# Supplementary material for: Photoinduced copper-catalyzed selective three-component 1,2-amino oxygenation of 1,3-dienes
Source: Royal Society of Chemistry journal article supplement (doi:10.1039/d3cc02769d), 2023-01-01
Supplement: d3cc02769d1.pdf [file d3cc02769d1.pdf]

## Supporting Information

### **Photoinduced copper-catalyzed selective three-component 1,2-amino oxygenation of 1,3-dienes**

Yonghong Liu,<sup>a</sup> Huaipu Yan,<sup>a</sup> Yuqing Chen,<sup>a</sup> Erjun Hao,<sup>\*b</sup> and Lei Shi <sup>\*a</sup>

- a. School of Chemistry, Dalian University of Technology, 116024, Dalian, China.
- b. Collaborative Innovation Center of Henan Province for Green Manufacturing of Fine Chemicals, Key Laboratory of Green Chemical Media and Reactions, Ministry of Education, School of Chemistry and Chemical Engineering, Henan Normal University, 453007, Xinxiang, China.

Corresponding author: Lei Shi, E-mail: [shilei17@dlut.edu.cn](mailto:shilei17@dlut.edu.cn)

## Table of Contents

|                                                                                            |    |
|--------------------------------------------------------------------------------------------|----|
| S1 General Information .....                                                               | 3  |
| S2 Picture of Reaction Set – Up .....                                                      | 4  |
| S3 Preparation of 3 .....                                                                  | 5  |
| S4 Optimization of Reaction Conditions .....                                               | 6  |
| S4.1. The Effect of ligands .....                                                          | 6  |
| S4.2. The Effect of Copper Salts .....                                                     | 7  |
| S4.3. The Effect of Light sources .....                                                    | 7  |
| S4.4. The Effect of Solvents .....                                                         | 8  |
| S5. Control Experiments .....                                                              | 9  |
| S6 The Mechanism Studies .....                                                             | 10 |
| 6.1 UV-Vis Absorption Spectra .....                                                        | 10 |
| 6.2 Luminescence Experiments .....                                                         | 11 |
| 6.3 Lifetime Chromatogram of Cu(CH <sub>3</sub> CN) <sub>4</sub> PF <sub>6</sub> /L4 ..... | 13 |
| 6.4 Cyclic Voltammetry of Cu(CH <sub>3</sub> CN) <sub>4</sub> PF <sub>6</sub> /L4 .....    | 14 |
| 6.5 Radical Trapping Experiment .....                                                      | 15 |
| S7 Photoinduced copper-catalyzed asymmetric 1,2-amino oxygenation of 1,3-dienes .....      | 16 |
| S8 Synthetic Application of the Reaction .....                                             | 19 |
| S8.1 Gram-Scale Reaction .....                                                             | 19 |
| S8.2 Reduction of 4a .....                                                                 | 19 |
| S8.3 Epoxidation of 9 .....                                                                | 20 |
| S9 General Procedure and Characterization Data .....                                       | 20 |
| S10 NMR Spectra .....                                                                      | 35 |

## S1 General Information

Unless otherwise noted, all reactions of substrates preparation were conducted in flame – dried glassware under a nitrogen atmosphere using anhydrous solvent passed through an activated alumina column (Innovative Technology). Commercially available reagents were used without further purification. Thin layer chromatography (TLC) was performed using Huanghai TLC silica gel plates HSG F254 and visualized using UV light, anisaldehyde or potassium permanganate. The photocatalytic reactions were performed on WATTCAS Parallel Light Reactor (WP – TEC – 1020L) with 10W LED. HP 8453 spectrometer was used as the light source for the UV-Vis data. The fluorescence emission spectra were collected on an Edinburgh Instruments (FLS1000). Cyclic voltammetry (CV) was taken using a CHI760E potentiostation.  $^1\text{H}$  and  $^{13}\text{C}$  NMR spectra were recorded in  $\text{CDCl}_3$  on a Bruker 400M spectrometer. Chemical shifts in  $^1\text{H}$  NMR spectra were reported in parts per million (ppm) on the  $\delta$  scale from an internal standard of residual  $\text{CDCl}_3$  (7.26 ppm). Data for  $^1\text{H}$  NMR were reported as follows: chemical shift, multiplicity (s = singlet, d = doublet, t = triplet, q = quartet, m = multiplet, br = broad), coupling constant in Hertz (Hz) and integration. Data for  $^{13}\text{C}$  NMR spectra were reported in terms of chemical shift in ppm from the central peak of  $\text{CDCl}_3$  (77.00 ppm). High performance liquid chromatography (HPLC) was carried out with Agress 1100 HPLC gradient system on a D1100 UV spectrophotometric detector (ELITE).

## S2 Picture of Reaction Set – Up

The photocatalytic reactions were performed on WATTCAS Parallel Light Reactor (WP – TEC – 1020L).

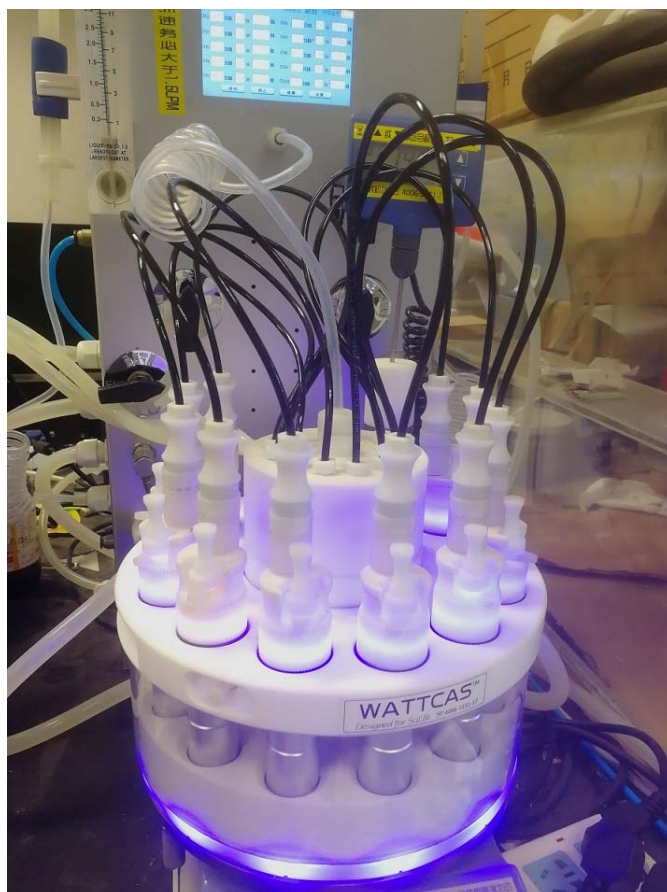

Picture of the photoreactor

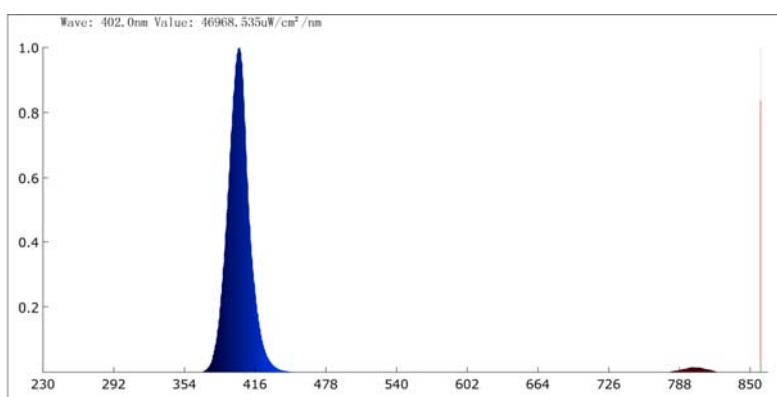

Emission spectra of the 10 W blue LED lamp (maximum emission at  $\lambda = 402$  nm). Wave length: 395 nm-405 nm Quartz glass was used as reaction vessel. Distance between light source and quartz tube was approximately 0.5 cm and no filter was used for the reaction.

### S3 Preparation of 3

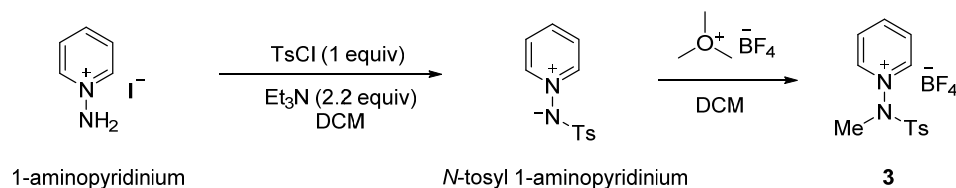

A round bottom flask equipped with a magnetic stir bar was charged with the raw material 1-aminopyridinium (20.0 mmol, 1.0 equiv.) and tosyl chloride (20.0 mmol, 1.1 equiv.) was added DCM (100 mL) and triethylamine (44.0 mmol, 2.2 equiv) at room temperature. The reaction mixture was stirred at room temperature for overnight. The resulting mixture was extracted with dichloromethane and water for three times, and washed with water. The combined organic layers were dried over magnesium sulfate, filtered and concentrated in vacuum. The resulting mixture was purified by flash column chromatography on silica gel ( $\text{CH}_2\text{Cl}_2$  : MeOH = 20 : 1) to obtain *N*-tosyl 1-aminopyridinium ylides. Then, to a solution of *N*-tosyl 1-aminopyridinium ylide (10.0 mmol, 1.0 equiv) in dichloromethane (50 mL) were added trimethyloxonium tetrafluoroborate (Meerwein's reagent, 12 mmol, 1.1 equiv) at room temperature. The reaction mixture was stirred at room temperature for 5 h. The resulting mixture was concentrated under reduced pressure. The product was recrystallized with diethylether from  $\text{CH}_2\text{Cl}_2$  and MeOH (20:1) solution at - 20 °C. A solid product **3a** was obtained.

**N-tosyl 1-aminopyridinium tetrafluoroborate salts (3)**,  $^1\text{H}$  NMR (400 MHz,  $\text{DMSO}-d_6$ )  $\delta$  9.27 – 8.95 (m, 3H), 8.26 (dd,  $J$  = 7.1, 1.5 Hz, 2H), 7.64 (d,  $J$  = 8.3 Hz, 2H), 7.57 (d,  $J$  = 8.2 Hz, 2H), 3.55 (s, 3H), 2.48 (s, 3H). (*J. Am. Chem. Soc.* 2020, 142, 26, 11370–11375)

## S4 Optimization of Reaction Conditions

### S4.1. The Effect of ligands

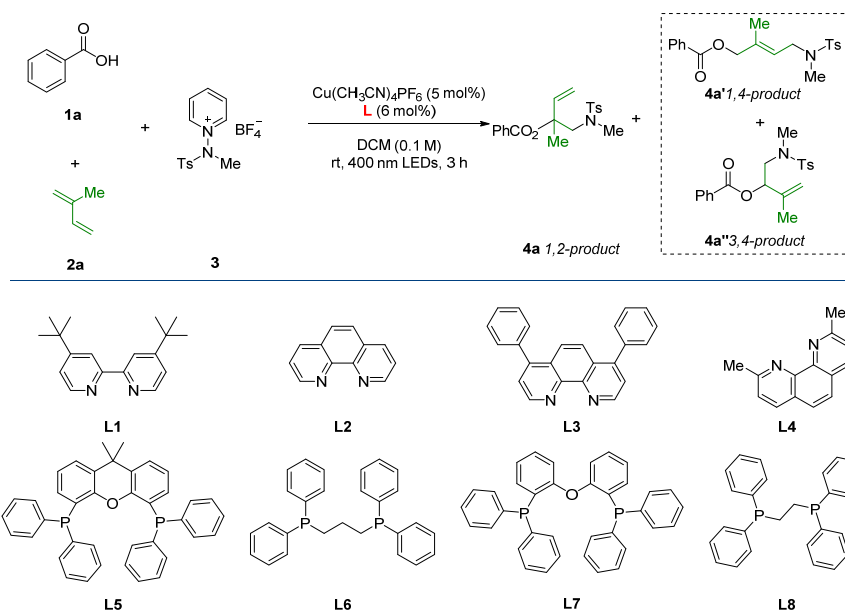

| Entry <sup>a</sup> | [L]       | yield of <b>4a</b> (%) <sup>b</sup> | <b>4a</b> : <b>4a'</b> : <b>4a''</b> |
|--------------------|-----------|-------------------------------------|--------------------------------------|
| 1                  | <b>L1</b> | 19                                  | 10:0:1                               |
| 2                  | <b>L2</b> | trace                               | ND                                   |
| 3                  | <b>L3</b> | 57                                  | 9:1:1                                |
| 4                  | <b>L4</b> | 85                                  | 21:1:2                               |
| 5                  | <b>L5</b> | 46                                  | 10:0:1                               |
| 6                  | <b>L6</b> | 24                                  | 10:0:1                               |
| 7                  | <b>L7</b> | trace                               | ND                                   |
| 8                  | <b>L8</b> | trace                               | ND                                   |

[a] Reaction conditions: **1a** (0.2 mmol), **2a** (0.6 mmol), **3** (0.3 mmol),  $\text{Cu}(\text{CH}_3\text{CN})_4\text{PF}_6$  (5 mol%), **L** (6 mol%) in DCM (0.1 M) under 400 nm LEDs reaction for 3 h. [b] Yields were determined by  $^1\text{H}$  NMR analysis with 1,3,5-trimethoxybenzene as the internal standard.

### S4.2. The Effect of Copper Salts

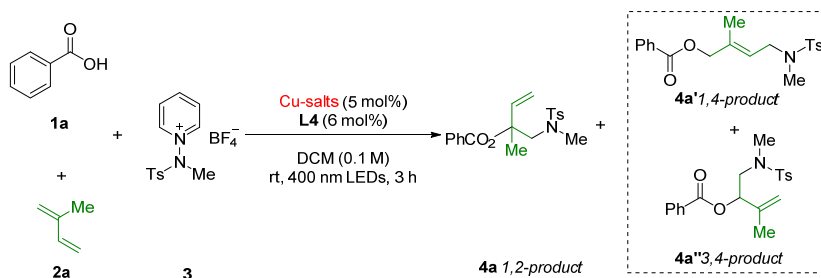

| Entry <sup>a</sup> | [Cu]                 | Yield of 4a (%) <sup>b</sup> | 4a:4a':4a'' |
|--------------------|----------------------|------------------------------|-------------|
| 1                  | Cu(OTf) <sub>2</sub> | 64                           | 14:1:2      |
| 2                  | CuI                  | 71                           | 15:1:2      |
| 3                  | CuCl                 | 72                           | 15:1:2      |

[a] Reaction conditions: **1a** (0.2 mmol), **2a** (0.6 mmol), **3** (0.3 mmol), Cu (5 mol%), **L4** (6 mol%) in DCM (0.1 M) under 400 nm LEDs reaction for 3 h. [b] Yields were determined by <sup>1</sup>H NMR analysis with 1,3,5-trimethoxybenzene as the internal standard.

### S4.3. The Effect of Light sources

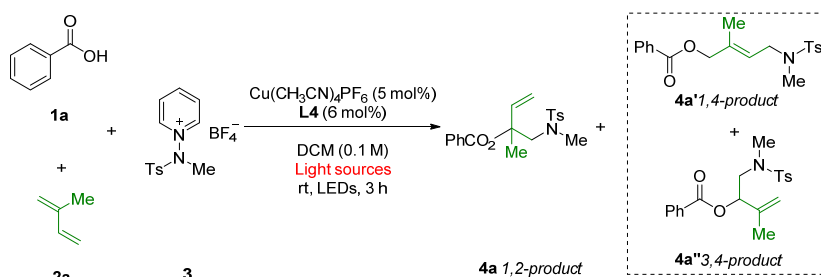

| Entry <sup>a</sup> | [Light source] | Yield of 4a (%) <sup>b</sup> | 4a:4a':4a'' |
|--------------------|----------------|------------------------------|-------------|
| 1                  | 400-405 nm     | 85                           | 21:1:2      |
| 2                  | 450-455 nm     | 62                           | 21:1:2      |

[a] Reaction conditions: **1a** (0.2 mmol), **2a** (0.6 mmol), **3** (0.3 mmol), Cu(CH<sub>3</sub>CN)<sub>4</sub>PF<sub>6</sub> (5 mol%), **L4** (6 mol%) in solvents (0.1 M) under LEDs reaction for 3 h. [b] Yields were determined by <sup>1</sup>H NMR analysis with 1,3,5-trimethoxybenzene as the internal standard.

#### S4.4. The Effect of Solvents

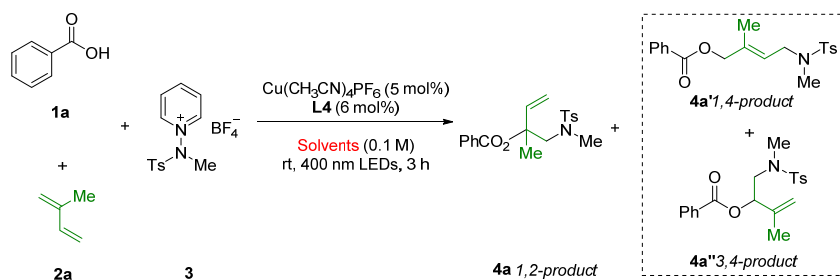

| Entry <sup>a</sup> | [Solvent]          | Yield of 4a (%) <sup>b</sup> | 4a:4a':4a'' |
|--------------------|--------------------|------------------------------|-------------|
| 1                  | THF                | 63                           | 9:0:1       |
| 2                  | CH <sub>3</sub> CN | 89                           | 18:0:1      |
| 3                  | DCE                | 85                           | 20:2:3      |

[a] Reaction conditions: **1a** (0.2 mmol), **2a** (0.6 mmol), **3** (0.3 mmol), Cu(CH<sub>3</sub>CN)<sub>4</sub>PF<sub>6</sub> (5 mol%), **L4** (6 mol%) in solvents (0.1 M) under 400 nm LEDs reaction for 3 h. [b] Yields were determined by <sup>1</sup>H NMR analysis with 1,3,5-trimethoxybenzene as the internal standard.

## S5. Control Experiments

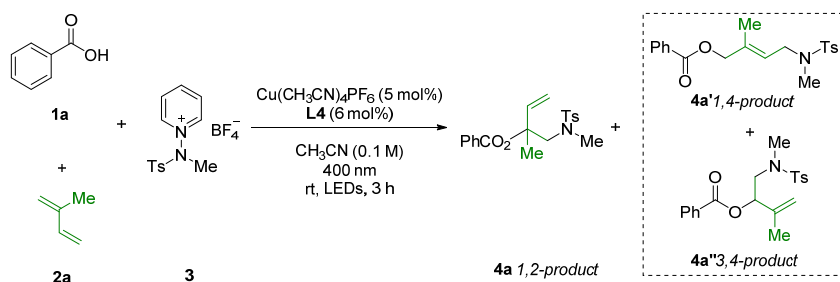

| Entry <sup>a</sup> | [variation from standard conditions]              | Yield of <b>4a</b> (%) <sup>b</sup> | <b>4a:4a':4a''</b> |
|--------------------|---------------------------------------------------|-------------------------------------|--------------------|
| 1                  | none                                              | 89                                  | 18:0:1             |
| 2                  | No ligands                                        | trace                               | ND                 |
| 3                  | No $\text{Cu}(\text{CH}_3\text{CN})_4\text{PF}_6$ | 0                                   | -                  |
| 4                  | No Light                                          | 0                                   | -                  |
| 5                  | <b>3</b> (1.3 equiv instead of 1.5 equiv)         | 89(87) <sup>c</sup>                 | 18:0:1             |
| 6                  | <b>3</b> (1.0 equiv instead of 1.5 equiv)         | 75                                  | 18:0:1             |

[a] Reaction conditions: **1a** (0.2 mmol), **2a** (0.6 mmol), **3** (0.3 mmol),  $\text{Cu}(\text{CH}_3\text{CN})_4\text{PF}_6$  (5 mol%), **L4** (6 mol%) in solvents (0.1 M) under 400 nm LEDs reaction for 3 h. [b] Yields were determined by  $^1\text{H}$  NMR analysis with 1,3,5-trimethoxybenzene as the internal standard.[c] Isolated yield.

## 6.1 UV-Vis Absorption Spectra

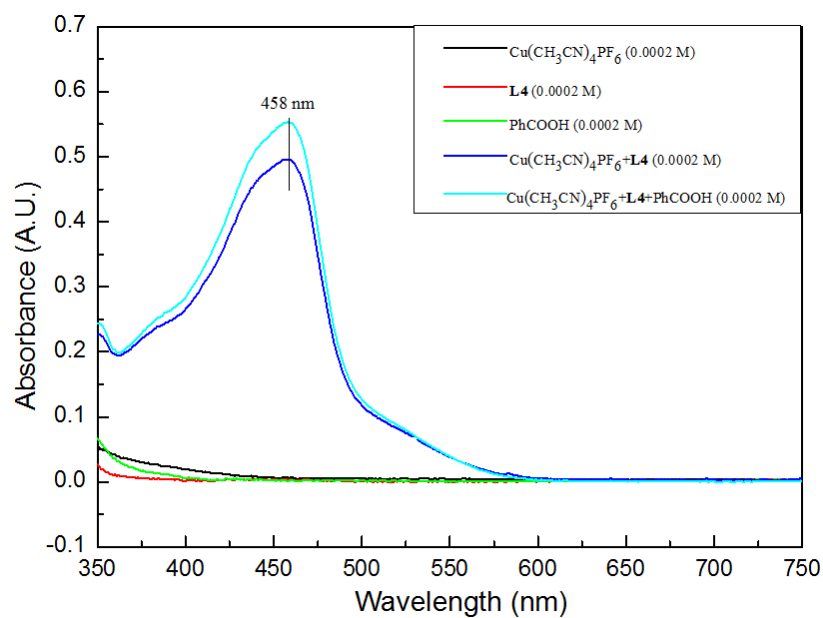

**Figure S1** UV-vis spectrum of the  $\text{Cu}(\text{CH}_3\text{CN})_4\text{PF}_6$  in DCM, **L4** in DCM,  $\text{PhCOOH}$  in DCM,  $\text{Cu}(\text{CH}_3\text{CN})_4\text{PF}_6 + \text{L4}$  in DCM and  $\text{Cu}(\text{CH}_3\text{CN})_4\text{PF}_6 + \text{L4} + \text{PhCOOH}$  in DCM, the peak at 458 nm.

## 6.2 Luminescence Experiments

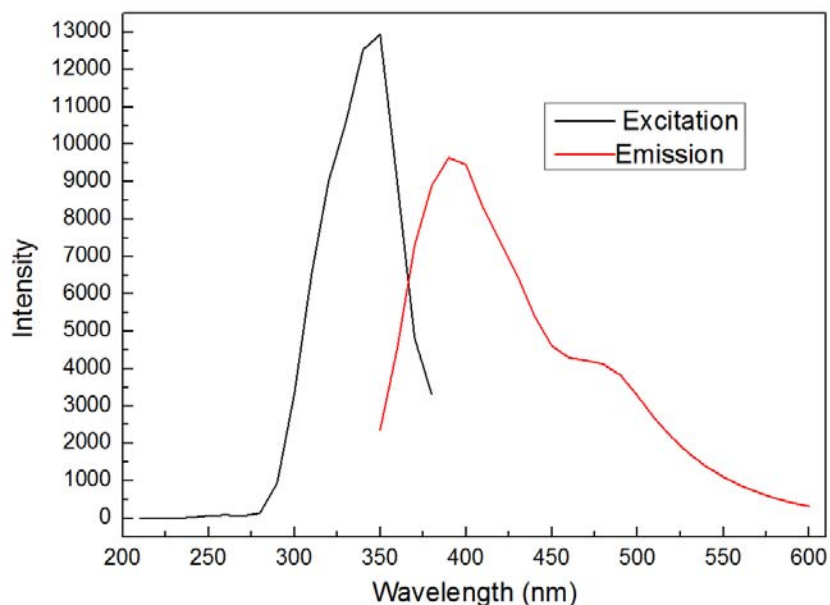

**Figure S2** Excitation and emission wavelengths of  $\text{Cu}(\text{CH}_3\text{CN})_4\text{PF}_6/\text{L4}$

Fluorescence spectra were collected on Edinburgh Instruments (FLS1000) for all experiments. All solutions were excited at 349 nm and the emission intensity was collected at 355 nm, slit is 3 nm. The concentration of  $\text{Cu}(\text{CH}_3\text{CN})_4\text{PF}_6/\text{L4}$  was 0.0002 M. The results revealed that the maximum excitation and emission peaks of  $\text{Cu}(\text{CH}_3\text{CN})_4\text{PF}_6/\text{L4}$  complex were found at 349 nm and 392 nm, and the cross peak was found at 366 nm.

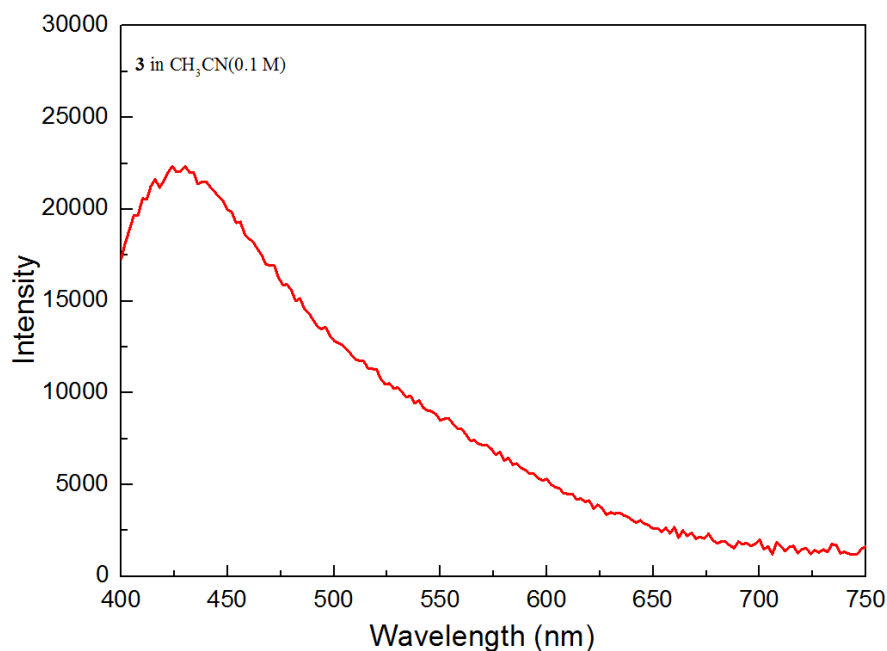

**Figure S3** Fluorescence spectra of **3**

Fluorescence spectra were collected on Edinburgh Instruments (FLS1000) for all experiments. All solutions were excited at 360 nm and the emission intensity was collected at 400 nm, slit is 4 nm. The

concentration of **3** was 0.1 M. The results suggest that **3** had obvious fluorescence at the 430 nm emission peak.

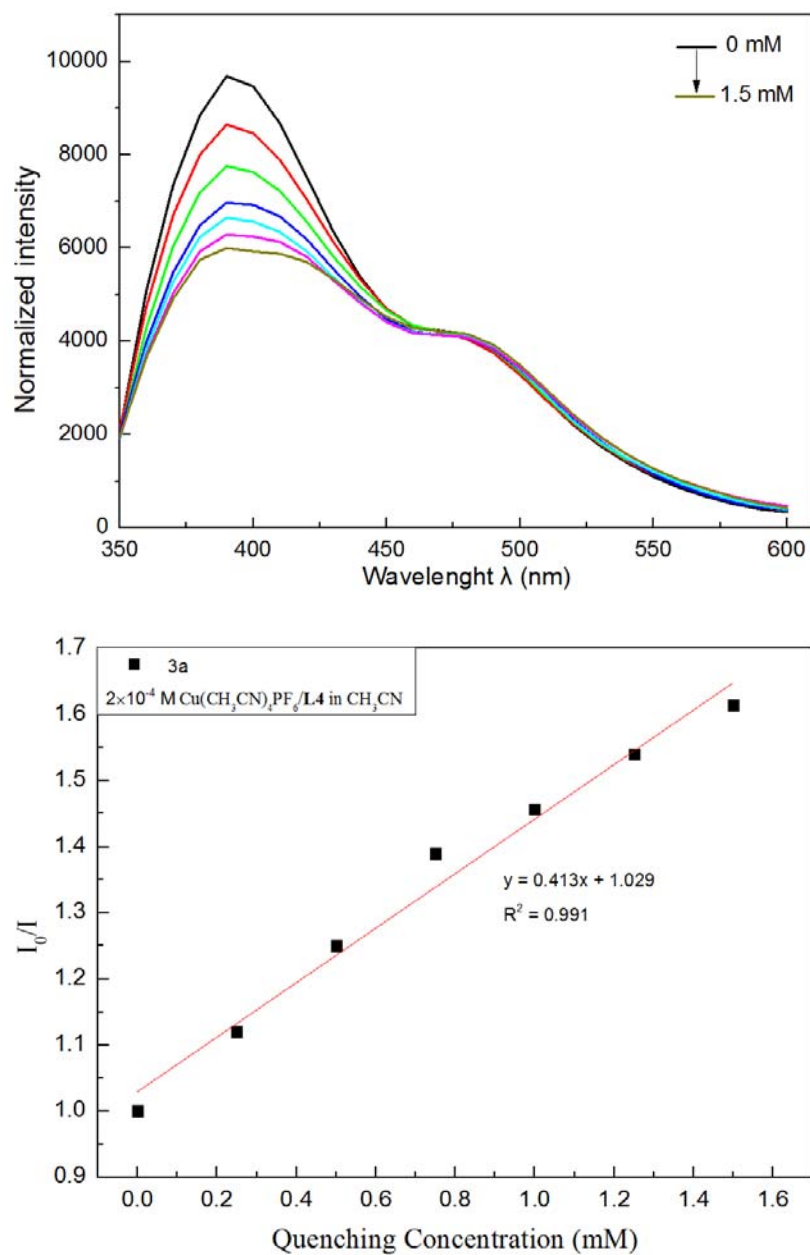

**Figure S4** Stern–volmer quenching studies of  $\text{Cu}(\text{CH}_3\text{CN})_4\text{PF}_6/\text{L4}$  by **3**

All solutions were excited at 349 nm and the emission intensity was collected at 392 nm, slit is 3 nm. The concentration of  $\text{Cu}(\text{CH}_3\text{CN})_4\text{PF}_6/\text{L4}$  was 0.0002 M. The significant decrease of  $[\text{Cu}]/\text{L4}$  luminescence could be observed in the presence of substrate **3**.

### 6.3 Lifetime Chromatogram of $\text{Cu}(\text{CH}_3\text{CN})_4\text{PF}_6/\text{L4}$

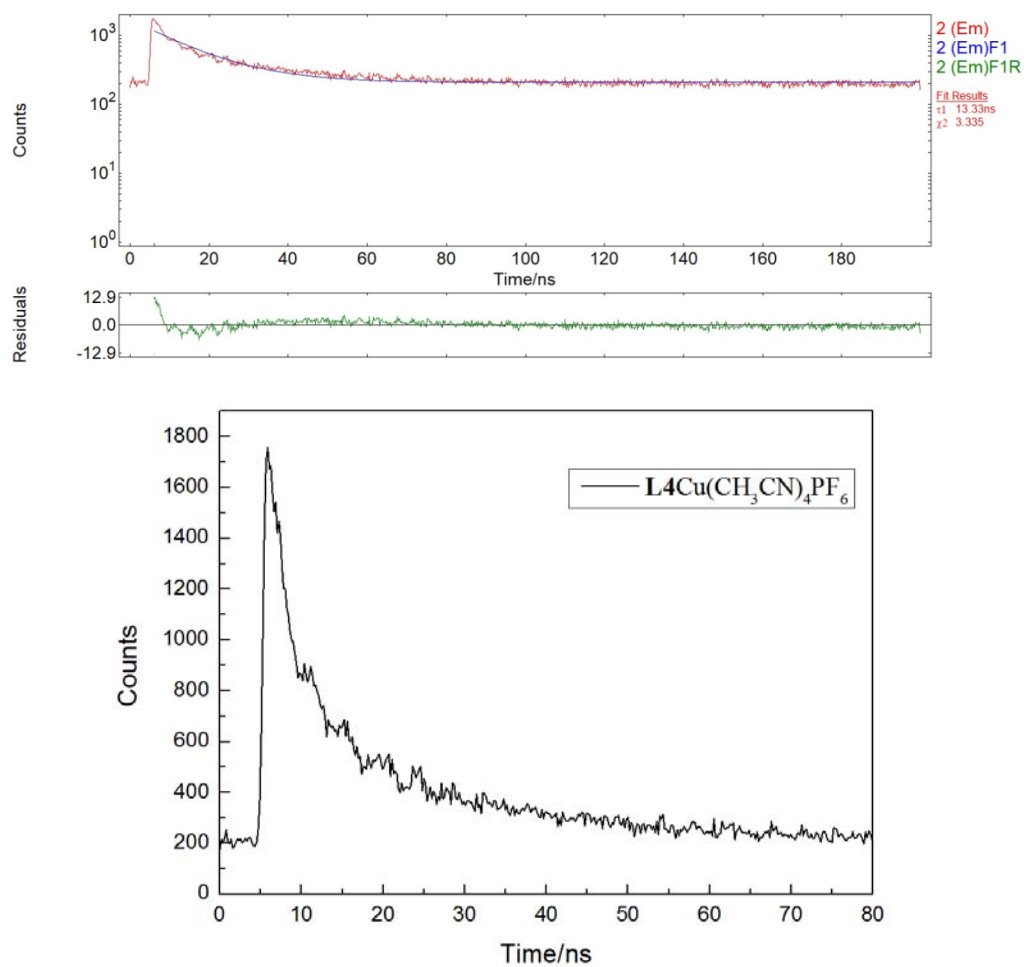

**Figure S5** Lifetime chromatogram of  $\text{Cu}(\text{CH}_3\text{CN})_4\text{PF}_6/\text{L4}$  excited at 405 nm EPL, 0.0002 M solution in  $\text{CH}_3\text{CN}$  (recorded on an Edinburgh Instrument FLS1000).

Lifetime:  $\tau = 13.33$  ns.

#### 6.4 Cyclic Voltammetry of $\text{Cu}(\text{CH}_3\text{CN})_4\text{PF}_6/\text{L4}$

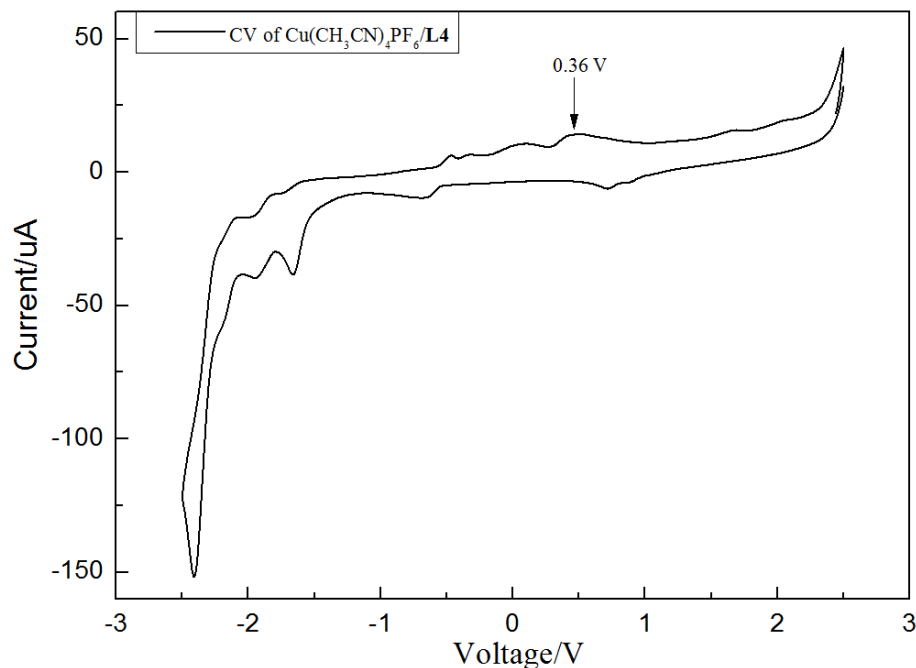

**Figure S6** Cyclic voltammograms of  $\text{Cu}(\text{CH}_3\text{CN})_4\text{PF}_6/\text{L4}$  (generated in situ by stirring a 1:1 mixture of  $\text{Cu}(\text{CH}_3\text{CN})_4\text{PF}_6$  and ligand **L4**) in  $\text{CH}_3\text{CN}$ .

Cyclic voltammetry (CV) was taken using a CHI760E potentiostation. CV measurement was carried out in 0.1 M of  $\text{nBu}_4\text{NPF}_6/\text{CH}_3\text{CN}$  at a scan rate of 100 mV/s with the protection of Ar. The working electrode was a glassy carbon, the counter electrode was a Pt wire, and the reference electrode was Ag/AgCl. The results were as follow:  $\text{Cu}(\text{CH}_3\text{CN})_4\text{PF}_6/\text{L4}$  ( $E_{p/2} = 0.36 \text{ V vs SCE}$  in  $\text{CH}_3\text{CN}$ ).

## 6.5 Radical Trapping Experiment

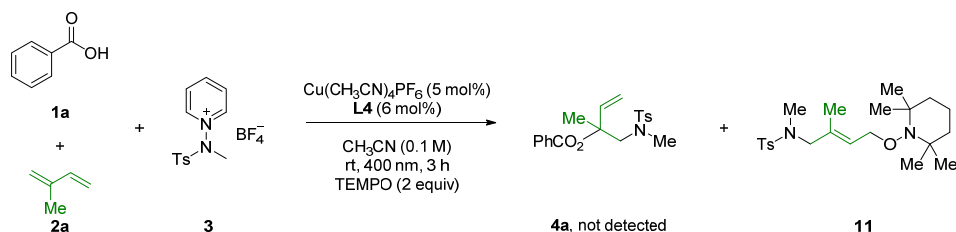

In a flame-dried 10 mL reaction tube equipped with a magnetic stirrer bar was charged sequentially with  $\text{Cu}(\text{CH}_3\text{CN})_4\text{PF}_6$  (0.05 equiv), **L4** (0.06 equiv), **1a** (0.2 mmol, 1.0 equiv). The Schlenk flask was transferred to an argon-filled glovebox and followed by the addition of dry  $\text{CH}_3\text{CN}$  (0.1 M). Then the mixture was stirred at room temperature for 30 min. To the resulting mixture were added **2a** (0.6 mmol, 3.0 equiv), **3** (0.26 mmol, 1.3 equiv) and TEMPO (0.4 mmol, 2.0 equiv). Next, the resulting mixture was removed out the glovebox. At last, the reaction mixture was stirred at room temperature with irradiation of 10 W 400 nm LED for 3 h. ( the reaction solution was detected by  $^1\text{H}$  NMR and HRMS analysis and the **4a** was not found, **11** was detected by HRMS)

**HRMS of 11:** Calc'd for  $\text{C}_{22}\text{H}_{37}\text{N}_2\text{O}_3\text{S}$ ,  $[\text{M}+\text{H}]^+$  409.2519 (100.0%), 410.2553 (23.8%), 411.2477 (4.5%); Found 409.2506, 410.2539, 411.2452.

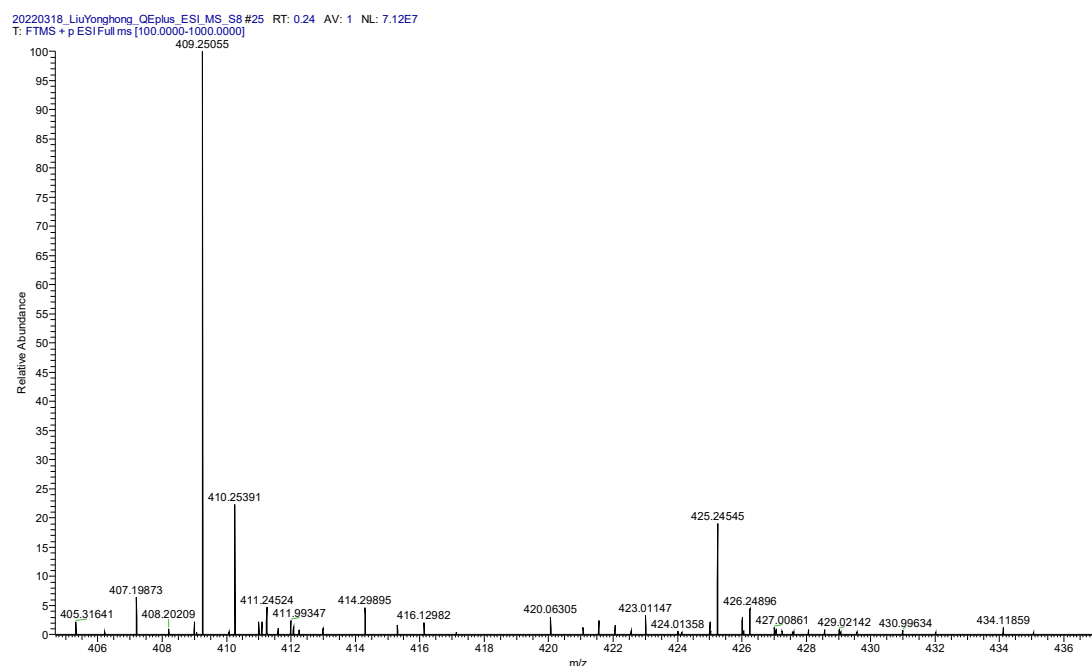

## S7 Photoinduced copper-catalyzed asymmetric 1,2-amino oxygenation of 1,3-dienes

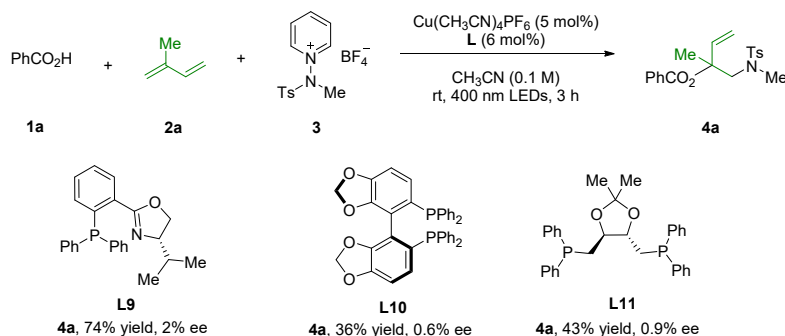

In a flame-dried 10 mL reaction tube equipped with a magnetic stirrer bar was charged sequentially with Cu(CH<sub>3</sub>CN)<sub>4</sub>PF<sub>6</sub> (0.05 equiv), **L** (0.06 equiv). The Schlenk flask was transferred to an argon-filled glovebox and followed by the addition of dry CH<sub>3</sub>CN (2 mL). Then the mixture was stirred at room temperature for 30 min. To the resulting mixture were added **1** (0.2 mmol, 1.0 equiv), **2** (0.6 mmol, 3.0 equiv) and **3** (0.26 mmol, 1.3 equiv). Next, the resulting mixture was removed out the glovebox. At last, the reaction mixture was stirred at room temperature with irradiation of 10 W 400 nm LED for 3 h. After completion of the reaction, the solvent was evaporated in vacuo and the crude material was purified by flash column chromatography to furnish the desired product.

### Racemic (**4a**)

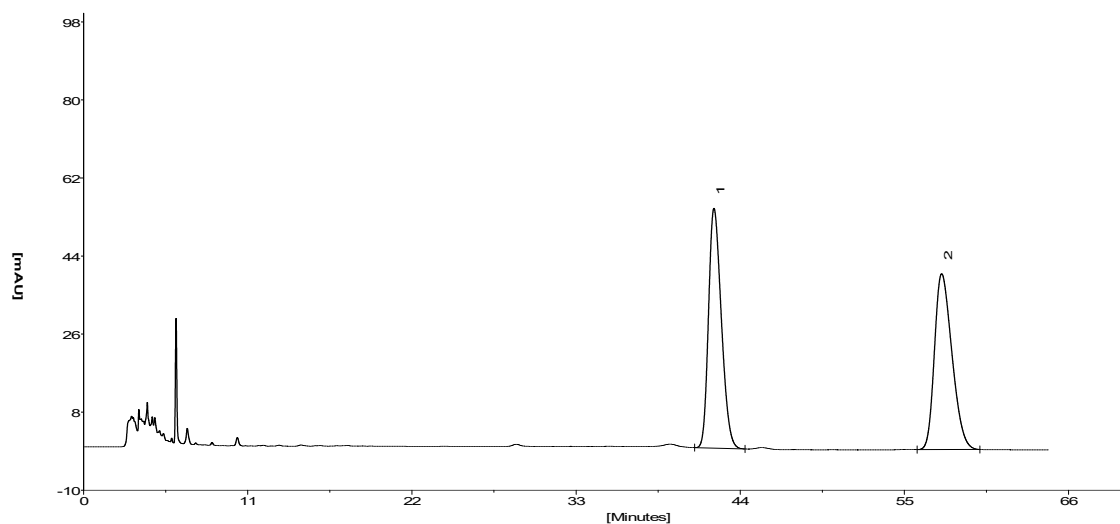

|          | Retention time (min) | Height (mV) | Area (mV.sec) |
|----------|----------------------|-------------|---------------|
| <b>1</b> | 42.23792             | 55.34       | 3294.85       |
| <b>2</b> | 57.49917             | 40.55       | 3299.59       |

HPLC analysis (Chiralpak AD-H column, n-hexane and i-PrOH, 98:2 v/v, flow rate 1.0 mL/min,  $\lambda$  = 254 nm, 25 °C),  $t_R$  (major) = 42.24 min,  $t_R$  (minor) = 57.50 min

## L9

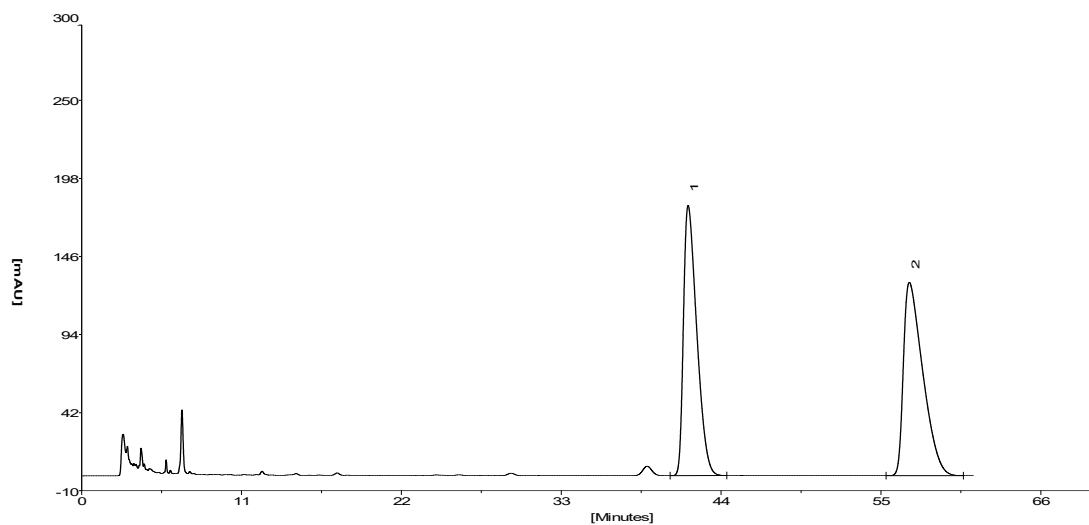

|   | Retention time (min) | Height (mV) | Area (mV.sec) |
|---|----------------------|-------------|---------------|
| 1 | 41.73083             | 179.94      | 11410.09      |
| 2 | 56.95417             | 128.73      | 11887.60      |

HPLC analysis (Chiralpak AD-H column, n-hexane and i-PrOH, 98:2 v/v, flow rate 1.0 mL/min,  $\lambda$  = 254 nm, 25 °C),  $t_R$  (major) = 41.73 min,  $t_R$  (minor) = 56.95 min

## L10

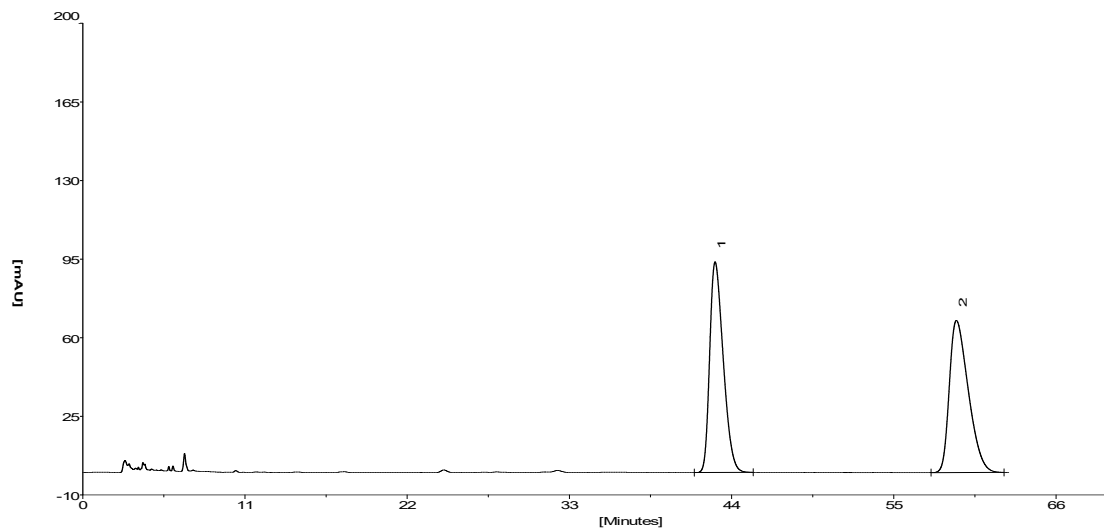

|   | Retention time (min) | Height (mV) | Area (mV.sec) |
|---|----------------------|-------------|---------------|
| 1 | 42.88333             | 93.75       | 5969.25       |
| 2 | 59.24833             | 67.73       | 6045.58       |

HPLC analysis (Chiralpak AD-H column, n-hexane and i-PrOH, 98:2 v/v, flow rate 1.0 mL/min,  $\lambda$  = 254 nm, 25 °C),  $t_R$  (major) = 41.73 min,  $t_R$  (minor) = 56.95 min

L11

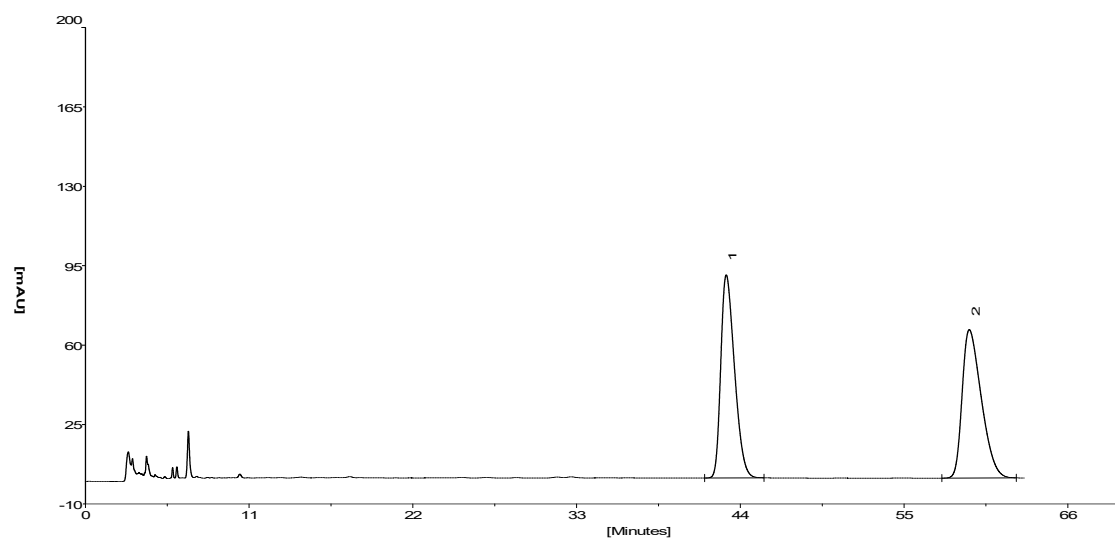

|   | Retention time (min) | Height (mV) | Area (mV.sec) |
|---|----------------------|-------------|---------------|
| 1 | 43.05167             | 89.52       | 5731.38       |
| 2 | 59.38083             | 65.39       | 5835.76       |

HPLC analysis (Chiralpak AD-H column, n-hexane and i-PrOH, 98:2 v/v, flow rate 1.0 mL/min,  $\lambda$  = 254 nm, 25 °C),  $t_R$  (major) = 41.73 min,  $t_R$  (minor) = 56.95 min

## S8 Synthetic Application of the Reaction

### S8.1 Gram-Scale Reaction

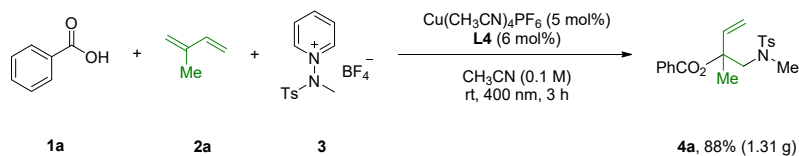

In a flame-dried 25 mL reaction tube equipped with a magnetic stirrer bar was charged sequentially with  $\text{Cu}(\text{CH}_3\text{CN})_4\text{PF}_6$  (0.05 equiv), **L4** (0.06 equiv), **1a** (3.0 mmol, 1.0 equiv). The Schlenk flask was transferred to an argon-filled glovebox and followed by the addition of dry  $\text{CH}_3\text{CN}$  (15 mL). Then the mixture was stirred at room temperature for 30 min. To the resulting mixture were added **2a** (9.0 mmol, 3.0 equiv) and **3** (3.9 mmol, 1.3 equiv). Next, the resulting mixture was removed out the glovebox. At last, the reaction mixture was stirred at room temperature with irradiation of 10 W 400 nm LED for 3 h. After completion of the reaction, the solvent was evaporated in vacuo and the crude material was purified by flash column chromatography to furnish the desired product **4a** (88%, 1.31 g).

### S8.2 Reduction of **4a**

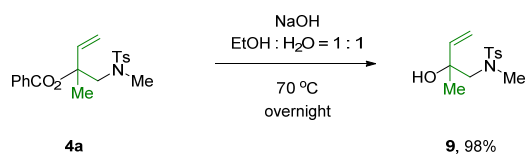

To a solution of **4a** (0.5 mmol, 1.0 equiv) in EtOH (5 mL) was added NaOH (1.5 mmol, 3.0 equiv) in  $\text{H}_2\text{O}$  (5 mL) and the reaction mixture was stirred for overnight at 70 °C. After completion of the reaction (TLC), the reaction was cooled to room temperature and DCM (5 mL) was added. The layers were separated and the aqueous layer extracted with DCM (50 mL x 3). The combined organic layers were washed with brine (20 mL), dried with  $\text{Na}_2\text{SO}_4$ , and concentrated in *vacuo* to yield the crude material. The crude material was purified by flash column chromatography (using petroleum ether/EtOAc = 6:1) to provide the  $\beta$ -amino alcohol compound **9** as a colorless oil in 98% yield (132 mg).  $R_f$  = 0.33 (PE:EA = 3:1).  $^1\text{H}$  NMR (400 MHz,  $\text{CDCl}_3$ )  $\delta$  7.66 (d,  $J$  = 7.9 Hz, 2H), 7.31 (d,  $J$  = 8.0 Hz, 2H), 5.91 (dd,  $J$  = 17.2, 10.7 Hz, 1H), 5.36 (dd,  $J$  = 17.3, 1.3 Hz, 1H), 5.14 (dd,  $J$  = 10.8, 1.3 Hz, 1H), 3.14 (d,  $J$  = 14.4 Hz, 1H), 2.86 (d,  $J$  = 14.4 Hz, 1H), 2.84 (s, 3H), 2.54 (s, 1H), 2.42 (s, 3H), 1.33 (s, 3H).  $^{13}\text{C}$  NMR (101 MHz,  $\text{CDCl}_3$ )  $\delta$  143.57, 142.59, 134.17, 129.71, 127.40, 113.79, 73.32, 59.76, 38.44, 25.76, 21.46. HRMS: Calc'd for  $\text{C}_{13}\text{H}_{19}\text{NNaO}_3\text{S}$ ,  $[\text{M}+\text{Na}]^+$  292.0983; found 292.0965.

### S8.3 Epoxidation of **9**

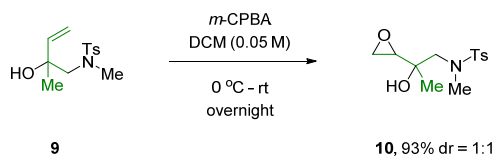

A solution of **9** (0.5 mmol, 1.0 equiv) in DCM (10 mL) was cooled by an ice bath and *m*-CPBA (2.0 mmol, 4 equiv) was added portion wise. The reaction mixture was allowed to warm to r.t. slowly and stirred vigorously overnight at r.t., then the reaction was quenched with saturated Na<sub>2</sub>S<sub>2</sub>O<sub>3</sub> solution and extracted with DCM. The concentrated organic layer was dried over anhydrous Na<sub>2</sub>SO<sub>4</sub>. The organic layer was then concentrated under reduced pressure and the crude material was purified by flash column chromatography (using petroleum ether/EtOAc = 4:1) to provide the **10** as a white solid in 93% yield (133 mg). R<sub>f</sub> = 0.2 and 0.21 (PE:EA = 2:1). <sup>1</sup>H NMR (400 MHz, CDCl<sub>3</sub>) δ 7.66 (dd, *J* = 8.2, 8.3 Hz, 2H), 7.31 (d, *J* = 8.0 Hz, 2H), 3.17 (d, *J* = 12 Hz, 1H), 3.10 – 3.00 (m, 2H), 2.87 (s, 3H), 2.79 – 2.71 (m, 1H), 2.41 (s, 3H), 2.35 (d, *J* = 16.2 Hz, 1H), 1.28 (s, 3H). <sup>13</sup>C NMR (101 MHz, CDCl<sub>3</sub>) δ 143.56, 134.28, 129.71, 127.42, 70.78, 58.68, 56.16, 44.46, 38.28, 24.22, 21.44. (Another Diastereomeric, <sup>1</sup>H NMR (400 MHz, CDCl<sub>3</sub>) δ 7.66 (dd, *J* = 8.2, 8.3 Hz, 2H), 7.31 (d, *J* = 8.0 Hz, 2H), 3.16 (d, *J* = 16 Hz, 1H), 3.10 – 3.00 (m, 2H), 2.85 (s, 3H), 2.79 – 2.71 (m, 1H), 2.41 (s, 3H), 2.35 (d, *J* = 16.2 Hz, 1H), 1.27 (s, 3H). <sup>13</sup>C NMR (101 MHz, CDCl<sub>3</sub>) δ 143.52, 134.12, 129.71, 127.25, 70.14, 56.73, 56.07, 43.14, 37.91, 21.57, 21.44.) HRMS: Calc'd for C<sub>13</sub>H<sub>20</sub>NO<sub>4</sub>S, [M+H]<sup>+</sup> 286.1108; found 286.1104.

### S9 General Procedure and Characterization Data

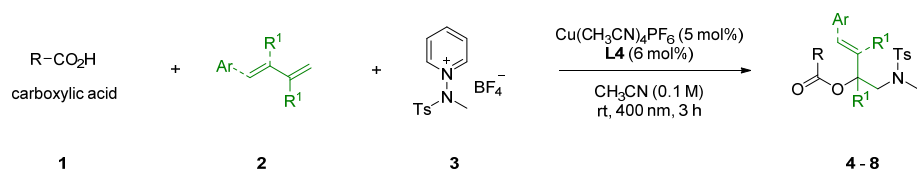

In a flame-dried 10 mL reaction tube equipped with a magnetic stirrer bar was charged sequentially with Cu(CH<sub>3</sub>CN)<sub>4</sub>PF<sub>6</sub> (0.05 equiv), **L4** (0.06 equiv). The Schlenk flask was transferred to an argon-filled glovebox and followed by the addition of dry CH<sub>3</sub>CN (2 mL). Then the mixture was stirred at room temperature for 30 min. To the resulting mixture were added **1** (0.2 mmol, 1.0 equiv), **2** (0.6 mmol, 3.0 equiv) and **3** (0.26 mmol, 1.3 equiv). Specification when alcohols were used (alcohols (5 equiv), **2a** (3 equiv), **3** (0.2 mmol, 1 equiv), stirred for 12 h). Next, the resulting mixture was removed out the glovebox. At last, the reaction mixture was stirred at room temperature with irradiation of 10 W 400 nm LED for 3 h. After completion of the reaction (TLC), the solvent was evaporated in vacuo and the crude material was purified by flash column chromatography to furnish the desired product.

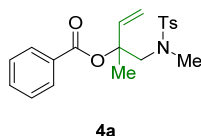

**1-((N,4-dimethylphenyl)sulfonamido)-2-methylbut-3-en-2-yl benzoate**, R<sub>f</sub> = 0.5 (PE:EA = 4:1). The crude material was purified by flash column chromatography (using petroleum ether/EtOAc =

10:1) to provide the title compound as a colorless oil in 87% yield (65 mg). **<sup>1</sup>H NMR** (400 MHz, CDCl<sub>3</sub>) δ 8.06 – 7.93 (m, 2H), 7.73 – 7.61 (m, 2H), 7.58 – 7.50 (m, 1H), 7.42 (dd, *J* = 8.4, 7.1 Hz, 2H), 7.31 (d, *J* = 8.0 Hz, 2H), 6.16 (dd, *J* = 17.5, 11.0 Hz, 1H), 5.44 – 5.21 (m, 2H), 3.59 (d, *J* = 14.5 Hz, 1H), 3.45 (d, *J* = 14.5 Hz, 1H), 2.85 (s, 3H), 2.42 (s, 3H), 1.82 (s, 3H). **<sup>13</sup>C NMR** (101 MHz, CDCl<sub>3</sub>) δ 165.24, 143.44, 139.38, 134.69, 132.92, 130.90, 129.70, 129.41, 128.35, 127.30, 115.23, 83.78, 57.50, 37.45, 22.05, 21.43. **HRMS**: Calc'd for C<sub>20</sub>H<sub>24</sub>NO<sub>4</sub>S, [M+H]<sup>+</sup> 374.1421; found 374.1413.

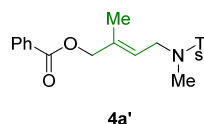

R<sub>f</sub> = 0.46 (PE:EA = 4:1). The crude material was purified by flash column chromatography (using petroleum ether/EtOAc = 10:1) to provide the title compound as a colorless oil. **<sup>1</sup>H NMR** (400 MHz, Chloroform-*d*) δ 8.06 – 7.99 (m, 2H), 7.70 – 7.66 (m, 2H), 7.61 – 7.54 (m, 1H), 7.45 (t, *J* = 7.6 Hz, 2H), 7.30 (d, *J* = 8.0 Hz, 2H), 5.49 (tq, *J* = 7.0, 1.4 Hz, 1H), 4.69 (s, 2H), 3.72 (d, *J* = 7.0 Hz, 2H), 2.68 (s, 3H), 2.41 (s, 3H), 1.73 (s, 3H). **<sup>13</sup>C NMR** (101 MHz, CDCl<sub>3</sub>) δ 166.14, 143.39, 135.49, 134.34, 133.09, 129.95, 129.65, 129.58, 128.41, 127.50, 121.75, 68.98, 47.24, 34.33, 21.49, 14.05.

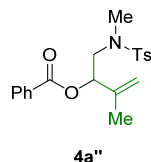

R<sub>f</sub> = 0.48 (PE:EA = 4:1). The crude material was purified by flash column chromatography (using petroleum ether/EtOAc = 10:1) to provide the title compound as a colorless oil. **<sup>1</sup>H NMR** (400 MHz, Chloroform-*d*) δ 8.05 (dd, *J* = 8.2, 1.4 Hz, 2H), 7.66 (d, *J* = 8.2 Hz, 2H), 7.61 – 7.51 (m, 1H), 7.45 (dd, *J* = 8.4, 7.1 Hz, 2H), 7.33 – 7.12 (m, 2H), 5.57 (dd, *J* = 8.1, 4.3 Hz, 1H), 5.15 – 5.08 (m, 1H), 5.08 – 4.98 (m, 1H), 3.48 (dd, *J* = 14.1, 8.1 Hz, 1H), 3.28 (dd, *J* = 14.1, 4.4 Hz, 1H), 2.84 (s, 3H), 2.39 (s, 3H), 1.87 (s, 3H). **<sup>13</sup>C NMR** (101 MHz, CDCl<sub>3</sub>) δ 165.46, 143.41, 140.76, 134.73, 133.13, 129.88, 129.67, 128.41, 127.31, 114.37, 75.03, 52.13, 35.82, 21.45, 18.54.

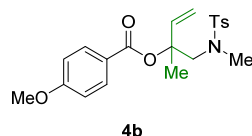

**1-((N,4-dimethylphenyl)sulfonamido)-2-methylbut-3-en-2-yl 4-methoxybenzoate**, R<sub>f</sub> = 0.3 (PE:EA = 4:1). The crude material was purified by flash column chromatography (using petroleum ether/EtOAc = 6:1) to provide the title compound as a colorless oil in 94% yield (76 mg). **<sup>1</sup>H NMR** (400 MHz, CDCl<sub>3</sub>) δ 8.06 – 7.86 (m, 2H), 7.80 – 7.59 (m, 2H), 7.31 (d, *J* = 8.0 Hz, 2H), 7.01 – 6.80 (m, 2H), 6.16 (dd, *J* = 17.5, 11.0 Hz, 1H), 5.48 – 5.18 (m, 2H), 3.84 (s, 3H), 3.58 (d, *J* = 14.5 Hz, 1H), 3.44 (d, *J* = 14.5 Hz, 1H), 2.83 (s, 3H), 2.42 (s, 3H), 1.79 (s, 3H). **<sup>13</sup>C NMR** (101 MHz, CDCl<sub>3</sub>) δ 165.06, 163.35, 143.42, 139.66, 134.74, 131.49, 129.70, 127.31, 123.28, 115.00, 113.60, 83.38, 57.45, 55.38, 37.39, 22.22, 21.44. **HRMS**: Calc'd for C<sub>21</sub>H<sub>25</sub>NNaO<sub>5</sub>S, [M+Na]<sup>+</sup> 426.1351; found 426.1333.

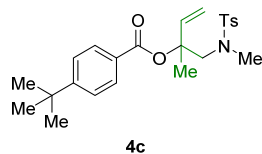

**1-((N,4-dimethylphenyl)sulfonamido)-2-methylbut-3-en-2-yl 4-(tert-butyl)benzoate**,  $R_f = 5$  (PE:EA = 4:1). The crude material was purified by flash column chromatography (using petroleum ether/EtOAc = 10:1) to provide the title compound as a colorless oil in 91% yield (78 mg). **<sup>1</sup>H NMR** (400 MHz, CDCl<sub>3</sub>)  $\delta$  8.00 – 7.79 (m, 2H), 7.67 (d,  $J = 8.2$  Hz, 2H), 7.44 (d,  $J = 8.5$  Hz, 2H), 7.32 (d,  $J = 8.0$  Hz, 2H), 6.15 (dd,  $J = 17.5, 11.0$  Hz, 1H), 5.46 – 5.11 (m, 2H), 3.58 (s, 1H), 3.46 (s, 1H), 2.85 (s, 3H), 2.43 (s, 3H), 1.80 (s, 3H), 1.32 (s, 9H). **<sup>13</sup>C NMR** (101 MHz, CDCl<sub>3</sub>)  $\delta$  165.30, 156.63, 143.42, 139.53, 134.75, 129.71, 129.68, 129.34, 129.31, 128.13, 127.32, 127.30, 125.36, 125.33, 115.09, 83.57, 57.48, 37.41, 37.38, 35.02, 31.04, 31.02, 22.16, 21.45, 21.43. **HRMS**: Calc'd for C<sub>24</sub>H<sub>31</sub>NNaO<sub>4</sub>S, [M+Na]<sup>+</sup> 452.1871; found 452.1853.

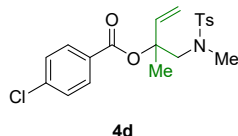

**1-((N,4-dimethylphenyl)sulfonamido)-2-methylbut-3-en-2-yl 4-chlorobenzoate**,  $R_f = 0.5$  (PE:EA = 4:1). The crude material was purified by flash column chromatography (using petroleum ether/EtOAc = 10:1) to provide the title compound as a colorless oil in 88% yield (72 mg). **<sup>1</sup>H NMR** (400 MHz, CDCl<sub>3</sub>)  $\delta$  7.93 (d,  $J = 8.6$  Hz, 2H), 7.66 (d,  $J = 8.3$  Hz, 2H), 7.38 (d,  $J = 8.6$  Hz, 2H), 7.31 (d,  $J = 8.0$  Hz, 2H), 6.15 (dd,  $J = 17.5, 11.0$  Hz, 1H), 5.43 – 5.21 (m, 2H), 3.57 (d,  $J = 14.5$  Hz, 1H), 3.43 (d,  $J = 14.6$  Hz, 1H), 2.82 (s, 3H), 2.42 (s, 3H), 1.80 (s, 3H). **<sup>13</sup>C NMR** (101 MHz, CDCl<sub>3</sub>)  $\delta$  164.39, 143.49, 139.35, 139.18, 134.62, 130.85, 129.72, 129.37, 128.69, 127.31, 115.43, 84.01, 57.57, 37.60, 21.97, 21.43. **HRMS**: Calc'd for C<sub>20</sub>H<sub>23</sub>ClNO<sub>4</sub>S, [M+H]<sup>+</sup> 408.1031; found 408.1017.

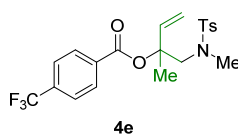

**1-((N,4-dimethylphenyl)sulfonamido)-2-methylbut-3-en-2-yl 4-(trifluoromethyl)benzoate**,  $R_f = 0.4$  (PE:EA = 4:1). The crude material was purified by flash column chromatography (using petroleum ether/EtOAc = 10:1) to provide the title compound as a colorless oil in 87% yield (77 mg). **<sup>1</sup>H NMR** (400 MHz, CDCl<sub>3</sub>)  $\delta$  8.12 (d,  $J = 8.1$  Hz, 2H), 7.67 (dd,  $J = 8.3, 6.5$  Hz, 4H), 7.32 (d,  $J = 8.1$  Hz, 2H), 6.16 (dd,  $J = 17.6, 11.0$  Hz, 1H), 5.44 – 5.23 (m, 2H), 3.59 (d,  $J = 14.6$  Hz, 1H), 3.44 (d,  $J = 14.6$  Hz, 1H), 2.84 (s, 3H), 2.42 (s, 3H), 1.82 (s, 3H). **<sup>13</sup>C NMR** (101 MHz, CDCl<sub>3</sub>)  $\delta$  164.06, 143.57, 138.98, 134.59, 134.34 (q,  $J_{C-F} = 32.1$  Hz), 134.22, 129.88, 129.75, 127.34, 125.40 (q,  $J_{C-F} = 3.9$  Hz), 123.56 (d,  $J_{C-F} = 272.6$  Hz), 115.67, 84.36, 77.32, 77.00, 76.68, 57.68, 37.74, 21.88, 21.43. **<sup>19</sup>F NMR** (377 MHz, CDCl<sub>3</sub>)  $\delta$  -63.12. **HRMS**: Calc'd for C<sub>21</sub>H<sub>22</sub>F<sub>3</sub>NNaO<sub>4</sub>S, [M+Na]<sup>+</sup> 464.1119; found 464.1102.

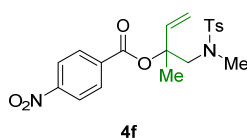

**1-((N,4-dimethylphenyl)sulfonamido)-2-methylbut-3-en-2-yl 4-nitrobenzoate**,  $R_f = 0.4$  (PE:EA = 4:1). The crude material was purified by flash column chromatography (using petroleum ether/EtOAc = 10:1) to provide the title compound as a pale-yellow oil in 69% yield (58 mg). **<sup>1</sup>H NMR** (400 MHz, CDCl<sub>3</sub>)  $\delta$  8.27 (dd,  $J = 8.8, 2.1$  Hz, 2H), 8.23 – 8.12 (m, 2H), 7.76 – 7.61 (m, 2H), 7.33 (d,  $J = 8.0$  Hz, 2H), 6.16 (dd,  $J = 17.5, 11.0$  Hz, 1H), 5.42 – 5.27 (m, 2H), 3.58 (d,  $J = 14.7$  Hz,

1H), 3.44 (d,  $J = 14.7$  Hz, 1H), 2.84 (s, 15H), 2.44 (s, 3H), 1.83 (s, 3H).  $^{13}\text{C}$  NMR (101 MHz,  $\text{CDCl}_3$ )  $\delta$  163.45, 150.46, 143.65, 138.77, 136.43, 134.52, 130.66, 129.80, 127.39, 123.54, 115.98, 84.70, 57.79, 38.01, 21.81, 21.49. HRMS: Calc'd for  $\text{C}_{20}\text{H}_{23}\text{N}_2\text{O}_6\text{S}$ ,  $[\text{M}+\text{H}]^+ 419.1271$ ; found 419.1262.

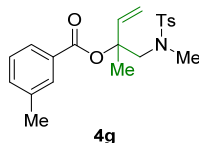

**1-((N,4-dimethylphenyl)sulfonamido)-2-methylbut-3-en-2-yl 3-methylbenzoate**,  $R_f = 0.5$  (PE:EA = 4:1). The crude material was purified by flash column chromatography (using petroleum ether/EtOAc = 3:1) to provide the title compound as a colorless oil in 90% yield (70 mg).  $^1\text{H}$  NMR (400 MHz,  $\text{CDCl}_3$ )  $\delta$  7.84 – 7.72 (m, 2H), 7.71 – 7.62 (m, 2H), 7.43 – 7.18 (m, 4H), 6.16 (dd,  $J = 17.5$ , 11.0 Hz, 1H), 5.52 – 5.19 (m, 2H), 3.60 (d,  $J = 14.5$  Hz, 1H), 3.46 (d,  $J = 14.5$  Hz, 1H), 2.84 (s, 3H), 2.42 (s, 3H), 2.37 (s, 3H), 1.81 (s, 3H).  $^{13}\text{C}$  NMR (101 MHz,  $\text{CDCl}_3$ )  $\delta$  165.42, 143.42, 139.42, 138.13, 134.69, 133.67, 130.82, 129.99, 129.68, 128.24, 127.29, 126.51, 115.16, 83.68, 57.39, 37.40, 22.11, 21.42, 21.20. HRMS: Calc'd for  $\text{C}_{21}\text{H}_{26}\text{NO}_4\text{S}$ ,  $[\text{M}+\text{Na}]^+ 388.1577$ ; found 388.1571.

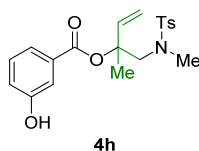

**1-((N,4-dimethylphenyl)sulfonamido)-2-methylbut-3-en-2-yl 3-hydroxybenzoate**,  $R_f = 0.33$  (PE:EA = 2:1). The crude material was purified by flash column chromatography (using petroleum ether/EtOAc = 4:1) to provide the title compound as a colorless oil in 63% yield (49 mg).  $^1\text{H}$  NMR (400 MHz,  $\text{CDCl}_3$ )  $\delta$  7.66 (d,  $J = 7.9$  Hz, 2H), 7.60 – 7.48 (m, 2H), 7.41 – 7.20 (m, 3H), 7.10 – 6.98 (m, 1H), 6.32 – 5.92 (m, 2H), 5.45 – 5.12 (m, 2H), 3.57 (d,  $J = 14.6$  Hz, 1H), 3.40 (d,  $J = 14.5$  Hz, 1H), 2.84 (s, 3H), 2.42 (s, 3H), 1.79 (s, 3H).  $^{13}\text{C}$  NMR (101 MHz,  $\text{CDCl}_3$ )  $\delta$  165.27, 155.98, 143.62, 139.23, 134.55, 132.21, 129.79, 129.66, 127.34, 121.66, 120.31, 116.27, 115.46, 83.88, 57.75, 37.61, 21.97, 21.48. HRMS: Calc'd for  $\text{C}_{20}\text{H}_{23}\text{NNaO}_5\text{S}$ ,  $[\text{M}+\text{Na}]^+ 412.1195$ ; found 412.1178.

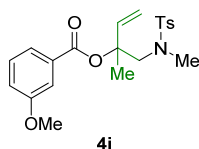

**1-((N,4-dimethylphenyl)sulfonamido)-2-methylbut-3-en-2-yl 3-methoxybenzoate**,  $R_f = 0.3$  (PE:EA = 4:1). The crude material was purified by flash column chromatography (using petroleum ether/EtOAc = 5:1) to provide the title compound as a colorless oil in 90% yield (83 mg).  $^1\text{H}$  NMR (400 MHz,  $\text{CDCl}_3$ )  $\delta$  7.76 – 7.63 (m, 2H), 7.60 – 7.52 (m, 2H), 7.38 – 7.27 (m, 3H), 7.08 (ddd,  $J = 8.3$ , 2.7, 1.1 Hz, 1H), 6.15 (dd,  $J = 17.6$ , 11.0 Hz, 1H), 5.42 – 5.23 (m, 2H), 3.82 (s, 3H), 3.58 (d,  $J = 14.5$  Hz, 1H), 3.42 (d,  $J = 14.5$  Hz, 1H), 2.85 (s, 3H), 2.42 (s, 3H), 1.81 (s, 3H).  $^{13}\text{C}$  NMR (101 MHz,  $\text{CDCl}_3$ )  $\delta$  165.12, 159.54, 143.46, 139.35, 134.70, 132.21, 129.71, 129.36, 127.32, 121.77, 119.41, 115.28, 114.01, 83.77, 57.72, 55.38, 37.53, 21.95, 21.44. HRMS: Calc'd for  $\text{C}_{21}\text{H}_{25}\text{NNaO}_5\text{S}$ ,  $[\text{M}+\text{Na}]^+ 426.1351$ ; found 426.1337.

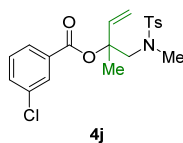

**1-((N,4-dimethylphenyl)sulfonamido)-2-methylbut-3-en-2-yl 3-chlorobenzoate**, R<sub>f</sub> = 4 (PE:EA = 4:1). The crude material was purified by flash column chromatography (using petroleum ether/EtOAc = 10:1) to provide the title compound as a colorless oil in 91% yield (74 mg). **<sup>1</sup>H NMR** (400 MHz, CDCl<sub>3</sub>) δ 7.95 (d, *J* = 1.9 Hz, 1H), 7.88 (d, *J* = 7.8 Hz, 1H), 7.67 (d, *J* = 8.3 Hz, 2H), 7.51 (ddd, *J* = 8.1, 2.2, 1.1 Hz, 1H), 7.40 – 7.29 (m, 3H), 6.15 (dd, *J* = 17.5, 11.0 Hz, 1H), 5.42 – 5.17 (m, 2H), 3.58 (d, *J* = 14.6 Hz, 1H), 3.44 (d, *J* = 14.6 Hz, 1H), 2.83 (s, 3H), 2.43 (s, 3H), 1.81 (s, 3H). **<sup>13</sup>C NMR** (101 MHz, CDCl<sub>3</sub>) δ 164.03, 143.52, 139.05, 134.64, 134.51, 132.94, 132.70, 129.74, 129.72, 129.53, 127.60, 127.34, 115.60, 84.30, 57.53, 37.62, 21.96, 21.46. **HRMS**: Calc'd for C<sub>20</sub>H<sub>22</sub>ClNNaO<sub>4</sub>S, [M+Na]<sup>+</sup> 430.0856; found 430.0839.

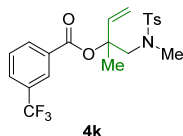

**1-((N,4-dimethylphenyl)sulfonamido)-2-methylbut-3-en-2-yl 3-(trifluoromethyl)benzoate**, R<sub>f</sub> = 0.4 (PE:EA = 4:1). The crude material was purified by flash column chromatography (using petroleum ether/EtOAc = 10:1) to provide the title compound as a colorless oil in 94% yield (83 mg). **<sup>1</sup>H NMR** (400 MHz, CDCl<sub>3</sub>) δ 8.25 (s, 1H), 8.20 (d, *J* = 7.9 Hz, 1H), 7.80 (d, *J* = 7.9 Hz, 1H), 7.67 (d, *J* = 8.4 Hz, 2H), 7.57 (t, *J* = 7.8 Hz, 1H), 7.33 (t, *J* = 5.4 Hz, 2H), 6.16 (dd, *J* = 17.6, 11.0 Hz, 1H), 5.52 – 5.22 (m, 2H), 3.59 (d, *J* = 14.6 Hz, 1H), 3.45 (d, *J* = 14.6 Hz, 1H), 2.85 (d, *J* = 3.4 Hz, 3H), 2.43 (d, *J* = 3.4 Hz, 3H), 1.83 (d, *J* = 3.4 Hz, 3H). **<sup>13</sup>C NMR** (101 MHz, CDCl<sub>3</sub>) δ 163.94, 143.57, 138.95, 134.62, 132.70, 131.03 (q, *J*<sub>C-F</sub> = 33.2 Hz), 130.54, 129.76, 129.44, 129.42 (d, *J*<sub>C-F</sub> = 3.6 Hz), 127.36, 126.36 (d, *J*<sub>C-F</sub> = 4.2 Hz), 123.59 (d, *J*<sub>C-F</sub> = 272.2 Hz), 115.74, 84.46, 57.73, 37.73, 21.85, 21.45. **<sup>19</sup>F NMR** (377 MHz, CDCl<sub>3</sub>) δ -62.84. **HRMS**: Calc'd for C<sub>21</sub>H<sub>22</sub>F<sub>3</sub>NNaO<sub>4</sub>S, [M+Na]<sup>+</sup> 464.1119; found 464.1099.

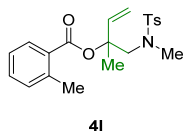

**1-((N,4-dimethylphenyl)sulfonamido)-2-methylbut-3-en-2-yl 2-methylbenzoate**, R<sub>f</sub> = 0.35 (PE:EA = 4:1). The crude material was purified by flash column chromatography (using petroleum ether/EtOAc = 10:1) to provide the title compound as a colorless oil in 92% yield (71 mg). **<sup>1</sup>H NMR** (400 MHz, CDCl<sub>3</sub>) δ 7.83 (dd, *J* = 8.1, 1.5 Hz, 1H), 7.66 (d, *J* = 8.3 Hz, 2H), 7.38 (td, *J* = 7.5, 1.5 Hz, 1H), 7.31 (d, *J* = 8.0 Hz, 2H), 7.22 (d, *J* = 7.4 Hz, 2H), 6.18 (dd, *J* = 17.6, 11.0 Hz, 1H), 5.43 – 5.22 (m, 2H), 3.57 (d, *J* = 14.5 Hz, 1H), 3.44 (d, *J* = 14.5 Hz, 1H), 2.83 (s, 3H), 2.56 (s, 3H), 2.43 (s, 3H), 1.82 (s, 3H). **<sup>13</sup>C NMR** (101 MHz, CDCl<sub>3</sub>) δ 166.29, 143.44, 140.05, 139.60, 134.69, 131.82, 131.71, 130.38, 130.11, 129.71, 127.35, 125.69, 115.23, 83.71, 57.53, 37.55, 22.10, 21.55, 21.46. **HRMS**: Calc'd for C<sub>21</sub>H<sub>26</sub>NO<sub>4</sub>S, [M+H]<sup>+</sup> 388.1577; found 388.1566.

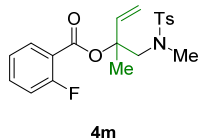

**1-((N,4-dimethylphenyl)sulfonamido)-2-methylbut-3-en-2-yl 2-fluorobenzoate**, R<sub>f</sub> = 0.4 (PE:EA = 4:1). The crude material was purified by flash column chromatography (using petroleum ether/EtOAc = 10:1) to provide the title compound as a colorless oil in 93% yield (73 mg). **<sup>1</sup>H NMR** (400 MHz, CDCl<sub>3</sub>) δ 7.88 (td, *J* = 7.6, 1.9 Hz, 1H), 7.70 – 7.62 (m, 2H), 7.53 – 7.45 (m, 1H),

7.31 (d,  $J = 8.0$  Hz, 2H), 7.18 (td,  $J = 7.6, 1.2$  Hz, 1H), 7.09 (ddd,  $J = 11.0, 8.3, 1.1$  Hz, 1H), 6.13 (dd,  $J = 17.5, 11.0$  Hz, 1H), 5.50 – 5.14 (m, 2H), 3.56 (d,  $J = 14.6$  Hz, 1H), 3.37 (d,  $J = 14.5$  Hz, 1H), 2.84 (s, 3H), 2.42 (s, 3H), 1.83 (s, 3H).  $^{13}\text{C}$  NMR (101 MHz,  $\text{CDCl}_3$ )  $\delta$  163.05 (d,  $J_{\text{C-F}} = 3.6$  Hz), 161.62 (d,  $J_{\text{C-F}} = 258.7$  Hz), 143.42, 139.07, 134.69, 134.38 (d,  $J_{\text{C-F}} = 9.2$  Hz), 132.05, 129.69, 127.32, 124.01 (d,  $J_{\text{C-F}} = 3.8$  Hz), 119.52 (d,  $J_{\text{C-F}} = 10.2$  Hz), 116.89 (d,  $J_{\text{C-F}} = 22.6$  Hz), 115.55, 84.69, 57.78, 37.32, 37.29, 21.83, 21.44.  $^{19}\text{F}$  NMR (377 MHz,  $\text{CDCl}_3$ )  $\delta$  -109.38. HRMS: Calc'd for  $\text{C}_{20}\text{H}_{23}\text{FNO}_4\text{S}$ ,  $[\text{M}+\text{H}]^+$  392.1326; found 392.1313.

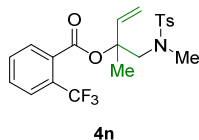

**1-((N,4-dimethylphenyl)sulfonamido)-2-methylbut-3-en-2-yl 2-(trifluoromethyl)benzoate**,  $R_f = 0.5$  (PE:EA = 4:1). The crude material was purified by flash column chromatography (using petroleum ether/EtOAc = 10:1) to provide the title compound as a colorless oil in 91% yield (80 mg).  $^1\text{H}$  NMR (400 MHz,  $\text{CDCl}_3$ )  $\delta$  7.76 – 7.68 (m, 2H), 7.68 – 7.62 (m, 2H), 7.62 – 7.53 (m, 2H), 7.30 (d,  $J = 8.0$  Hz, 2H), 6.17 (dd,  $J = 17.6, 11.0$  Hz, 1H), 5.45 – 5.26 (m, 2H), 3.50 (d,  $J = 14.6$  Hz, 1H), 3.38 (d,  $J = 14.6$  Hz, 1H), 2.76 (s, 3H), 2.42 (s, 3H), 1.83 (s, 3H).  $^{13}\text{C}$  NMR (101 MHz,  $\text{CDCl}_3$ )  $\delta$  165.32, 143.50, 138.48, 134.54, 132.13, 131.81, 130.87, 129.83, 129.72, 128.11 (d,  $J_{\text{C-F}} = 32.1$  Hz), 127.34, 126.56 (d,  $J_{\text{C-F}} = 5.7$  Hz), 123.37 (d,  $J_{\text{C-F}} = 273.3$  Hz) 85.32, 77.32, 77.00, 76.68, 57.68, 37.65, 21.43, 21.12.  $^{19}\text{F}$  NMR (377 MHz,  $\text{CDCl}_3$ )  $\delta$  -58.78. HRMS: Calc'd for  $\text{C}_{21}\text{H}_{23}\text{F}_3\text{NO}_4\text{S}$ ,  $[\text{M}+\text{H}]^+$  442.1294; found 442.1283.

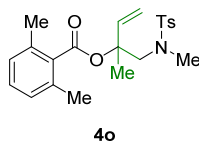

**1-((N,4-dimethylphenyl)sulfonamido)-2-methylbut-3-en-2-yl 2,6-dimethylbenzoate**,  $R_f = 5$  (PE:EA = 4:1). The crude material was purified by flash column chromatography (using petroleum ether/EtOAc = 10:1) to provide the title compound as a colorless oil in 91% yield (73 mg).  $^1\text{H}$  NMR (400 MHz,  $\text{CDCl}_3$ )  $\delta$  7.64 (d,  $J = 8.3$  Hz, 2H), 7.30 (d,  $J = 8.0$  Hz, 2H), 7.16 (t,  $J = 7.6, 7.6$  Hz, 1H), 7.00 (d,  $J = 7.6$  Hz, 2H), 6.21 (dd,  $J = 17.6, 11.0$  Hz, 1H), 5.46 – 5.28 (m, 2H), 3.40 (d,  $J = 14.4$  Hz, 1H), 3.22 (d,  $J = 14.3$  Hz, 1H), 2.76 (s, 3H), 2.42 (s, 3H), 2.32 (s, 6H), 1.91 (s, 3H).  $^{13}\text{C}$  NMR (101 MHz,  $\text{CDCl}_3$ )  $\delta$  168.27, 143.46, 139.20, 134.49, 134.36, 134.17, 129.68, 129.06, 127.54, 127.33, 116.16, 84.33, 58.81, 37.75, 21.42, 20.74, 19.49. HRMS: Calc'd for  $\text{C}_{22}\text{H}_{28}\text{NO}_4\text{S}$ ,  $[\text{M}+\text{H}]^+$  402.1734; found 402.1721.

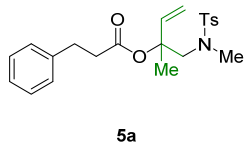

**1-((N,4-dimethylphenyl)sulfonamido)-2-methylbut-3-en-2-yl 3-phenylpropanoate**,  $R_f = 0.4$  (PE:EA = 4:1). The crude material was purified by flash column chromatography (using petroleum ether/EtOAc = 10:1) to provide the title compound as a colorless oil in 92% yield (74 mg).  $^1\text{H}$  NMR (400 MHz,  $\text{CDCl}_3$ )  $\delta$  7.76 – 7.57 (m, 2H), 7.34 – 7.24 (m, 4H), 7.22 – 7.15 (m, 3H), 5.97 (dd,  $J = 17.8, 10.8$  Hz, 1H), 5.33 – 5.12 (m, 2H), 3.36 (d,  $J = 14.5$  Hz, 1H), 3.17 (d,  $J = 14.4$  Hz, 1H), 2.91 (t,  $J = 7.7$  Hz, 2H), 2.72 (s, 3H), 2.59 (dd,  $J = 8.3, 7.2$  Hz, 2H), 2.43 (s, 3H), 1.65 (s, 3H).  $^{13}\text{C}$  NMR (101

MHz, CDCl<sub>3</sub>)  $\delta$  171.41, 143.39, 140.27, 139.20, 134.65, 129.67, 128.41, 128.26, 127.30, 126.23, 115.17, 83.25, 57.64, 37.44, 36.77, 30.77, 21.52, 21.43. **HRMS**: Calc'd for C<sub>22</sub>H<sub>28</sub>NO<sub>4</sub>S, [M+H]<sup>+</sup> 402.1734; found 402.1723.

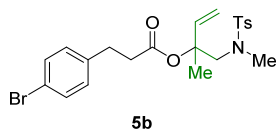

**1-((N,4-dimethylphenyl)sulfonamido)-2-methylbut-3-en-2-yl 3-(4-bromophenyl)propanoate**, R<sub>f</sub> = 0.4 (PE:EA = 4:1). The crude material was purified by flash column chromatography (using petroleum ether/EtOAc = 10:1) to provide the title compound as a colorless oil in 94% yield (90 mg). **<sup>1</sup>H NMR** (400 MHz, CDCl<sub>3</sub>)  $\delta$  7.75 – 7.56 (m, 2H), 7.37 (d, *J* = 8.4 Hz, 2H), 7.31 (d, *J* = 8.0 Hz, 2H), 7.13 – 7.00 (m, 2H), 5.96 (dd, *J* = 17.4, 11.2 Hz, 1H), 5.29 – 5.09 (m, 2H), 3.36 (d, *J* = 14.5 Hz, 1H), 3.17 (d, *J* = 14.5 Hz, 1H), 2.85 (t, *J* = 7.6 Hz, 2H), 2.73 (s, 3H), 2.56 (t, *J* = 7.6 Hz, 2H), 2.42 (s, 3H), 1.64 (s, 3H). **<sup>13</sup>C NMR** (101 MHz, CDCl<sub>3</sub>)  $\delta$  171.11, 143.42, 139.31, 139.14, 134.57, 131.43, 130.08, 129.69, 127.29, 119.98, 115.24, 83.30, 57.57, 37.56, 36.44, 30.10, 21.56, 21.43. **HRMS**: Calc'd for C<sub>22</sub>H<sub>27</sub>BrNO<sub>4</sub>S, [M+H]<sup>+</sup> 480.0839; found 480.0822.

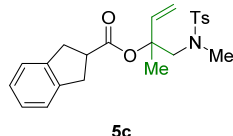

**1-((N,4-dimethylphenyl)sulfonamido)-2-methylbut-3-en-2-yl 2,3-dihydro-1H-indene-2-carboxylate**, R<sub>f</sub> = 0.4 (PE:EA = 4:1). The crude material was purified by flash column chromatography (using petroleum ether/EtOAc = 10:1) to provide the title compound as a colorless oil in 88% yield (73 mg). **<sup>1</sup>H NMR** (400 MHz, CDCl<sub>3</sub>)  $\delta$  7.65 (d, *J* = 8.3 Hz, 2H), 7.32 (d, *J* = 8.0 Hz, 2H), 7.23 – 7.08 (m, 4H), 6.04 (dd, *J* = 17.5, 11.0 Hz, 1H), 5.32 – 5.17 (m, 2H), 3.43 (d, *J* = 14.5 Hz, 1H), 3.36 – 3.09 (m, 6H), 2.79 (s, 3H), 2.43 (s, 3H). **<sup>13</sup>C NMR** (101 MHz, CDCl<sub>3</sub>)  $\delta$  173.69, 143.43, 141.34, 139.28, 134.63, 129.70, 127.32, 126.58, 124.26, 115.24, 83.31, 57.85, 44.36, 37.52, 36.01, 35.97, 21.52, 21.44. **HRMS**: Calc'd for C<sub>23</sub>H<sub>28</sub>NO<sub>4</sub>S, [M+H]<sup>+</sup> 414.1734; found 414.1720.

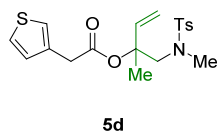

**1-((N,4-dimethylphenyl)sulfonamido)-2-methylbut-3-en-2-yl 2-(thiophen-3-yl)acetate**, R<sub>f</sub> = 0.35 (PE:EA = 4:1). The crude material was purified by flash column chromatography (using petroleum ether/EtOAc = 10:1) to provide the title compound as a colorless oil in 65% yield (51 mg). **<sup>1</sup>H NMR** (400 MHz, CDCl<sub>3</sub>)  $\delta$  7.74 – 7.52 (m, 2H), 7.40 – 7.20 (m, 3H), 7.10 (dd, *J* = 2.9, 1.2 Hz, 1H), 7.00 (dd, *J* = 4.9, 1.3 Hz, 1H), 5.99 (dd, *J* = 17.6, 10.9 Hz, 1H), 5.33 – 5.09 (m, 2H), 3.61 (s, 2H), 3.39 (d, *J* = 14.5 Hz, 1H), 3.16 (d, *J* = 14.5 Hz, 1H), 2.65 (s, 3H), 2.42 (s, 3H), 1.68 (s, 3H). **<sup>13</sup>C NMR** (101 MHz, CDCl<sub>3</sub>)  $\delta$  169.55, 143.41, 138.98, 134.63, 133.49, 129.68, 128.37, 127.29, 125.79, 122.84, 115.35, 83.73, 57.62, 37.26, 36.93, 21.51, 21.44. **HRMS**: Calc'd for C<sub>19</sub>H<sub>24</sub>NO<sub>4</sub>S<sub>2</sub>, [M+H]<sup>+</sup> 394.1141; found 394.1133.

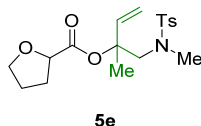

**1-((N,4-dimethylphenyl)sulfonamido)-2-methylbut-3-en-2-yl tetrahydrofuran-2-carboxylate**,  $R_f = 0.3$  (PE:EA = 3:1). The crude material was purified by flash column chromatography (using petroleum ether/EtOAc = 4:1) to provide the title compound as a colorless oil in 79% yield (58 mg).  **$^1\text{H}$  NMR** (400 MHz,  $\text{CDCl}_3$ )  $\delta$  7.63 (d,  $J = 8.3$  Hz, 2H), 7.30 (d,  $J = 8.1$  Hz, 2H), 6.01 (ddd,  $J = 17.5, 11.0, 4.1$  Hz, 1H), 5.35 – 5.07 (m, 2H), 4.34 (ddd,  $J = 8.5, 5.2, 2.0$  Hz, 1H), 3.99 – 3.80 (m, 2H), 3.40 (dd,  $J = 19.7, 14.5$  Hz, 1H), 3.20 (dd,  $J = 14.5, 13.1$  Hz, 1H), 2.82 (s, 3H), 2.41 (s, 3H), 2.18 (ddd,  $J = 10.9, 6.2, 3.2$  Hz, 1H), 2.05 – 1.79 (m, 3H), 1.69 (d,  $J = 2.5$  Hz, 3H).  **$^{13}\text{C}$  NMR** (101 MHz,  $\text{CDCl}_3$ )  $\delta$  171.82, 143.43, 138.77, 134.53, 129.68, 127.29, 115.54, 83.84, 69.22, 57.84, 57.73, 37.49, 29.94, 29.90, 25.19, 21.41. **HRMS**: Calc'd for  $\text{C}_{18}\text{H}_{26}\text{NO}_5\text{S}$ ,  $[\text{M}+\text{H}]^+ 368.1526$ ; found 368.1515.

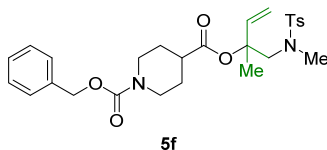

**1-benzyl 4-(1-((N,4-dimethylphenyl)sulfonamido)-2-methylbut-3-en-2-yl)piperidine-1,4-dicarboxylate**,  $R_f = 0.4$  (PE:EA = 2:1). The crude material was purified by flash column chromatography (using petroleum ether/EtOAc = 5:1) to provide the title compound as a pale yellow oil in 92% yield (95 mg).  **$^1\text{H}$  NMR** (400 MHz,  $\text{CDCl}_3$ )  $\delta$  7.64 (d,  $J = 8.3$  Hz, 2H), 7.40 – 7.27 (m, 7H), 5.99 (dd,  $J = 17.5, 11.0$  Hz, 1H), 5.34 – 5.18 (m, 2H), 5.11 (s, 2H), 4.09 (d,  $J = 12.9$  Hz, 2H), 3.41 (d,  $J = 14.6$  Hz, 1H), 3.22 (d,  $J = 14.6$  Hz, 1H), 2.89 (t,  $J = 12.2$  Hz, 2H), 2.79 (s, 3H), 2.46 – 2.38 (m, 4H), 1.87 (d,  $J = 13.5$  Hz, 2H), 1.66 (s, 3H), 1.64 – 1.51 (m, 2H).  **$^{13}\text{C}$  NMR** (101 MHz,  $\text{CDCl}_3$ )  $\delta$  172.91, 155.04, 143.44, 139.20, 136.63, 134.49, 129.67, 128.39, 127.90, 127.77, 127.27, 115.22, 83.14, 67.01, 57.55, 43.12, 41.66, 37.74, 27.76, 21.64, 21.40. **HRMS**: Calc'd for  $\text{C}_{27}\text{H}_{35}\text{N}_2\text{O}_6\text{S}$ ,  $[\text{M}+\text{H}]^+ 515.2210$ ; found 515.2168.

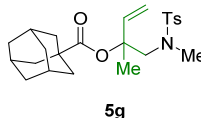

**1-((N,4-dimethylphenyl)sulfonamido)-2-methylbut-3-en-2-yl adamantane-1-carboxylate**,  $R_f = 0.55$  (PE:EA = 4:1). The crude material was purified by flash column chromatography (using petroleum ether/EtOAc = 10:1) to provide the title compound as a colorless oil in 88% yield (76 mg).  **$^1\text{H}$  NMR** (400 MHz,  $\text{CDCl}_3$ )  $\delta$  7.63 (d,  $J = 8.3$  Hz, 2H), 7.30 (d,  $J = 8.0$  Hz, 2H), 5.97 (dd,  $J = 17.5, 11.0$  Hz, 1H), 5.40 – 5.03 (m, 2H), 3.43 (d,  $J = 14.4$  Hz, 1H), 3.21 (d,  $J = 14.5$  Hz, 1H), 2.81 (s, 3H), 2.41 (s, 3H), 2.06 – 1.90 (m, 3H), 1.83 (d,  $J = 2.9$  Hz, 6H), 1.79 – 1.56 (m, 9H).  **$^{13}\text{C}$  NMR** (101 MHz,  $\text{CDCl}_3$ )  $\delta$  176.24, 143.36, 139.73, 134.67, 129.66, 127.28, 114.68, 82.57, 57.65, 41.06, 38.75, 37.44, 36.37, 27.83, 21.77, 21.42. **HRMS**: Calc'd for  $\text{C}_{24}\text{H}_{34}\text{NO}_4\text{S}$ ,  $[\text{M}+\text{H}]^+ 432.2203$ ; found 432.2190.

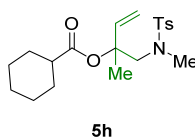

**1-((N,4-dimethylphenyl)sulfonamido)-2-methylbut-3-en-2-yl cyclohexanecarboxylate**,  $R_f = 0.55$  (PE:EA = 4:1). The crude material was purified by flash column chromatography (using petroleum ether/EtOAc = 10:1) to provide the title compound as a colorless oil in 90% yield (68 mg). **<sup>1</sup>H NMR** (400 MHz, CDCl<sub>3</sub>)  $\delta$  7.64 (d,  $J = 8.3$  Hz, 2H), 7.31 (d,  $J = 8.0$  Hz, 2H), 6.00 (dd,  $J = 17.5, 11.0$  Hz, 1H), 5.37 – 5.16 (m, 2H), 3.41 (d,  $J = 14.4$  Hz, 1H), 3.21 (d,  $J = 14.4$  Hz, 1H), 2.81 (s, 3H), 2.43 (s, 3H), 2.21 (tt,  $J = 11.3, 3.6$  Hz, 1H), 1.93 – 1.80 (m, 2H), 1.77 – 1.69 (m, 2H), 1.67 – 1.58 (m, 4H), 1.44 – 1.32 (m, 2H), 1.31 – 1.12 (m, 3H). **<sup>13</sup>C NMR** (101 MHz, CDCl<sub>3</sub>)  $\delta$  174.70, 143.41, 139.60, 134.73, 129.70, 127.35, 114.94, 82.75, 57.72, 43.97, 37.50, 28.93, 25.70, 25.38, 21.73, 21.48. **HRMS**: Calc'd for C<sub>20</sub>H<sub>30</sub>NO<sub>4</sub>S, [M+H]<sup>+</sup> 380.1890; found 380.1882.

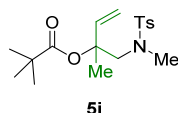

**1-((N,4-dimethylphenyl)sulfonamido)-2-methylbut-3-en-2-yl pivalate**,  $R_f = 0.55$  (PE:EA = 4:1). The crude material was purified by flash column chromatography (using petroleum ether/EtOAc = 10:1) to provide the title compound as a colorless oil in 64% yield (45 mg). **<sup>1</sup>H NMR** (400 MHz, CDCl<sub>3</sub>)  $\delta$  7.64 (d,  $J = 8.3$  Hz, 2H), 7.31 (d,  $J = 8.0$  Hz, 2H), 5.99 (dd,  $J = 17.5, 11.0$  Hz, 1H), 5.33 – 5.16 (m, 2H), 3.43 (d,  $J = 14.4$  Hz, 1H), 3.21 (d,  $J = 14.5$  Hz, 1H), 2.82 (s, 3H), 2.42 (s, 3H), 1.66 (s, 3H), 1.16 (s, 9H). **<sup>13</sup>C NMR** (101 MHz, CDCl<sub>3</sub>)  $\delta$  177.05, 143.42, 139.64, 134.70, 129.70, 127.33, 114.83, 82.79, 57.88, 39.15, 37.45, 27.08, 21.55, 21.46. **HRMS**: Calc'd for C<sub>18</sub>H<sub>28</sub>NO<sub>4</sub>S, [M+H]<sup>+</sup> 354.1734; found 354.1724.

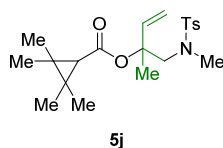

#### 1-((N,4-dimethylphenyl)sulfonamido)-2-methylbut-3-en-2-yl

**2,2,3,3-tetramethylcyclopropane-1-carboxylate**,  $R_f = 0.6$  (PE:EA = 4:1). The crude material was purified by flash column chromatography (using petroleum ether/EtOAc = 10:1) to provide the title compound as a white solid in 92% yield (73 mg). **<sup>1</sup>H NMR** (400 MHz, CDCl<sub>3</sub>)  $\delta$  7.63 (d,  $J = 8.3$  Hz, 2H), 7.30 (d,  $J = 8.1$  Hz, 2H), 6.02 (dd,  $J = 17.6, 11.0$  Hz, 1H), 5.35 – 4.98 (m, 2H), 3.38 (d,  $J = 14.3$  Hz, 1H), 3.21 (d,  $J = 14.3$  Hz, 1H), 2.82 (s, 3H), 2.41 (s, 3H), 1.64 (s, 3H), 1.18 (s, 3H), 1.16 (s, 3H), 1.14 (s, 3H), 1.13 (s, 3H), 1.07 (s, 1H). **<sup>13</sup>C NMR** (101 MHz, CDCl<sub>3</sub>)  $\delta$  170.72, 143.31, 140.12, 134.69, 129.64, 127.26, 114.45, 82.53, 57.59, 37.32, 36.13, 29.97, 23.48, 23.46, 21.93, 21.41, 16.42, 16.34. **HRMS**: Calc'd for C<sub>21</sub>H<sub>32</sub>NO<sub>4</sub>S, [M+H]<sup>+</sup> 394.2047; found 394.2036.

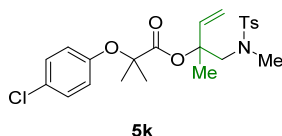

#### 1-((N,4-dimethylphenyl)sulfonamido)-2-methylbut-3-en-2-yl

**2-(4-chlorophenoxy)-2-methylpropanoate**,  $R_f = 0.5$  (PE:EA = 4:1). The crude material was purified by flash column chromatography (using petroleum ether/EtOAc = 10:1) to provide the title compound as a colorless oil in 90% yield (84 mg). **<sup>1</sup>H NMR** (400 MHz, CDCl<sub>3</sub>)  $\delta$  7.79 – 7.44 (m, 2H), 7.30 (d,  $J = 8.1$  Hz, 2H), 7.16 (d,  $J = 9.0$  Hz, 2H), 6.72 (d,  $J = 8.9$  Hz, 2H), 5.96 (dd,  $J = 17.6, 10.9$  Hz, 1H), 5.26 (dd,  $J = 14.3, 3.2$  Hz, 2H), 3.30 (d,  $J = 14.5$  Hz, 1H), 2.97 (d,  $J = 14.5$  Hz, 1H), 2.71 (s, 3H), 2.42 (s, 3H), 1.71 (s, 3H), 1.56 (s, 6H). **<sup>13</sup>C NMR** (101 MHz, CDCl<sub>3</sub>)  $\delta$  172.27, 153.92, 143.49,

138.36, 134.51, 129.71, 129.09, 127.35, 126.88, 119.69, 116.15, 84.52, 79.46, 58.60, 37.41, 25.21, 25.09, 21.46, 20.34. **HRMS**: Calc'd for  $C_{23}H_{29}ClNO_5S$ ,  $[M+H]^+$  466.1449; found 466.1438.

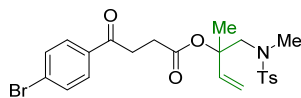

5i

**1-((N,4-dimethylphenyl)sulfonamido)-2-methylbut-3-en-2-yl 4-(4-bromophenyl)-4-oxobutanoate**,  $R_f$  = 0.27 (PE:EA = 4:1). The crude material was purified by flash column chromatography (using petroleum ether/EtOAc = 7:1) to provide the title compound as a colorless oil in 89% yield (90 mg).  **$^1H$  NMR** (400 MHz,  $CDCl_3$ )  $\delta$  7.81 (d,  $J$  = 8.6 Hz, 2H), 7.64 (d,  $J$  = 8.3 Hz, 2H), 7.58 (d,  $J$  = 8.5 Hz, 2H), 7.31 (d,  $J$  = 8.0 Hz, 2H), 6.01 (dd,  $J$  = 17.6, 11.0 Hz, 1H), 5.34 – 5.13 (m, 2H), 3.40 (d,  $J$  = 14.5 Hz, 1H), 3.32 – 3.13 (m, 3H), 2.84 (s, 3H), 2.71 (td,  $J$  = 6.4, 3.9 Hz, 2H), 2.42 (s, 3H), 1.67 (s, 3H).  **$^{13}C$  NMR** (101 MHz,  $CDCl_3$ )  $\delta$  197.05, 171.34, 143.42, 139.16, 135.17, 134.62, 131.86, 129.70, 129.49, 128.33, 127.32, 127.28, 115.22, 83.50, 57.61, 37.65, 33.12, 28.99, 21.61, 21.46. **HRMS**: Calc'd for  $C_{23}H_{27}BrNO_5S$ ,  $[M+H]^+$  508.0788; found 508.0771.

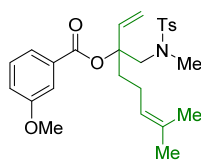

6a

**3-(((N,4-dimethylphenyl)sulfonamido)methyl)-7-methylocta-1,6-dien-3-yl 3-methoxybenzoate**,  $R_f$  = 0.4 (PE:EA = 5:1). The crude material was purified by flash column chromatography (using petroleum ether/EtOAc = 10:1) to provide the title compound as a colorless oil in 77% yield (73 mg).  **$^1H$  NMR** (400 MHz,  $CDCl_3$ )  $\delta$  7.62 (dd,  $J$  = 14.7, 7.8 Hz, 3H), 7.53 (s, 1H), 7.39 – 7.27 (m, 3H), 7.10 (dd,  $J$  = 8.3, 2.6 Hz, 1H), 6.01 (dd,  $J$  = 17.5, 11.1 Hz, 1H), 5.51 – 5.31 (m, 2H), 5.11 (t,  $J$  = 7.2 Hz, 1H), 3.83 (s, 3H), 3.78 (d,  $J$  = 14.6 Hz, 1H), 3.66 (d,  $J$  = 14.6 Hz, 1H), 2.72 (s, 3H), 2.51 – 2.31 (m, 4H), 2.18 – 1.92 (m, 2H), 1.86 (ddd,  $J$  = 13.7, 11.1, 5.0 Hz, 1H), 1.62 (s, 3H), 1.55 (s, 3H).  **$^{13}C$  NMR** (101 MHz,  $CDCl_3$ )  $\delta$  165.25, 159.55, 143.41, 138.43, 134.63, 132.15, 132.12, 129.70, 129.46, 127.31, 123.39, 121.85, 119.42, 115.22, 114.08, 86.31, 55.37, 54.75, 37.08, 35.28, 25.60, 21.67, 21.46, 17.59. **HRMS**: Calc'd for  $C_{26}H_{33}NNaO_5S$ ,  $[M+Na]^+$  494.1977; found 494.1953.

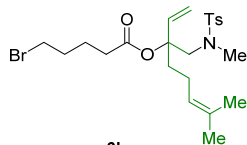

6b

**3-(((N,4-dimethylphenyl)sulfonamido)methyl)-7-methylocta-1,6-dien-3-yl 5-bromopentanoate**,  $R_f$  = 0.4 (PE:EA = 5:1). The crude material was purified by flash column chromatography (using petroleum ether/EtOAc = 10:1) to provide the title compound as a colorless oil in 67% yield (67 mg).  **$^1H$  NMR** (400 MHz,  $CDCl_3$ )  $\delta$  7.63 (d,  $J$  = 8.2 Hz, 2H), 7.30 (d,  $J$  = 8.0 Hz, 2H), 5.98 – 5.74 (m, 1H), 5.37 – 5.20 (m, 2H), 5.07 (t,  $J$  = 1.5 Hz, 1H), 3.61 (d,  $J$  = 14.7 Hz, 1H), 3.48 – 3.33 (m, 3H), 2.73 (s, 3H), 2.42 (s, 3H), 2.35 (t,  $J$  = 7.3 Hz, 2H), 2.27 (ddd,  $J$  = 13.6, 11.5, 5.3 Hz, 1H), 1.99 (qd,  $J$  = 11.7, 10.6, 5.2 Hz, 1H), 1.94 – 1.83 (m, 3H), 1.80 – 1.70 (m, 3H), 1.66 (s, 3H), 1.58 (s, 3H).  **$^{13}C$  NMR** (101 MHz,  $CDCl_3$ )  $\delta$  172.03, 143.43, 138.27, 134.45, 132.11, 129.70, 127.35, 123.31, 115.26, 85.35, 54.84, 37.62, 34.92, 34.16, 33.06, 31.90, 25.66, 23.29, 21.63, 21.47, 17.61. **HRMS**: Calc'd for  $C_{23}H_{35}BrNO_4S$ ,  $[M+H]^+$  500.1465; found 500.1270.

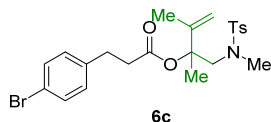

**1-((N,4-dimethylphenyl)sulfonamido)-2,3-dimethylbut-3-en-2-yl 3-(4-bromophenyl)propanoate**,  $R_f = 0.4$  (PE:EA = 5:1). The crude material was purified by flash column chromatography (using petroleum ether/EtOAc = 10:1) to provide the title compound as a colorless oil in 92% yield (91 mg).  **$^1\text{H}$  NMR** (400 MHz,  $\text{CDCl}_3$ )  $\delta$  7.64 (d,  $J = 8.2$  Hz, 2H), 7.38 (d,  $J = 8.4$  Hz, 2H), 7.32 (d,  $J = 8.0$  Hz, 2H), 7.06 (d,  $J = 8.3$  Hz, 2H), 5.06 – 4.91 (m, 1H), 4.88 (s, 1H), 3.32 (d,  $J = 14.4$  Hz, 1H), 3.06 (d,  $J = 14.4$  Hz, 1H), 2.86 (t,  $J = 7.6$  Hz, 2H), 2.76 (s, 3H), 2.56 (t,  $J = 7.3$  Hz, 2H), 2.43 (s, 3H), 1.71 (s, 3H), 1.69 (s, 3H).  **$^{13}\text{C}$  NMR** (101 MHz,  $\text{CDCl}_3$ )  $\delta$  170.75, 145.07, 143.47, 139.31, 134.57, 131.49, 130.10, 129.73, 127.34, 120.04, 112.65, 85.36, 57.77, 37.48, 36.35, 30.09, 21.49, 21.04, 19.26. **HRMS**: Calc'd for  $\text{C}_{23}\text{H}_{29}\text{BrNO}_4\text{S}$ ,  $[\text{M}+\text{H}]^+ 494.0995$ ; found 494.0983.

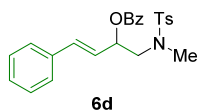

**(E)-1-((N,4-dimethylphenyl)sulfonamido)-4-phenylbut-3-en-2-yl benzoate**,  $R_f = 0.5$  (PE:EA = 5:1). The crude material was purified by flash column chromatography (using petroleum ether/EtOAc = 10:1) to provide the title compound as a colorless oil in 47% yield (41 mg).  **$^1\text{H}$  NMR** (400 MHz,  $\text{CDCl}_3$ )  $\delta$  8.13 – 8.05 (m, 2H), 7.71 – 7.64 (m, 2H), 7.61 – 7.55 (m, 1H), 7.47 – 7.42 (m, 2H), 7.39 (d,  $J = 7.1$  Hz, 2H), 7.35 – 7.29 (m, 2H), 7.29 – 7.22 (m, 3H), 6.77 (d,  $J = 16.0$  Hz, 1H), 6.26 (dd,  $J = 16.0, 7.1$  Hz, 1H), 5.86 (td,  $J = 7.3, 4.7$  Hz, 1H), 3.59 (dd,  $J = 14.1, 7.6$  Hz, 1H), 3.33 (dd,  $J = 14.1, 4.7$  Hz, 1H), 2.88 (s, 3H), 2.39 (s, 3H).  **$^{13}\text{C}$  NMR** (101 MHz,  $\text{CDCl}_3$ )  $\delta$  165.63, 143.44, 135.87, 134.84, 134.39, 133.16, 129.95, 129.74, 129.71, 128.58, 128.42, 128.37, 128.26, 127.34, 126.75, 124.26, 72.59, 53.35, 36.19, 21.47. **HRMS**: Calc'd for  $\text{C}_{25}\text{H}_{25}\text{NO}_4\text{SNa}$ ,  $[\text{M}+\text{Na}]^+ 458.1402$ ; found 458.1396.

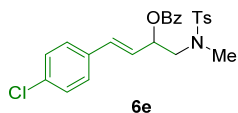

**(E)-4-(4-chlorophenyl)-1-((N,4-dimethylphenyl)sulfonamido)but-3-en-2-yl benzoate**,  $R_f = 0.5$  (PE:EA = 5:1). The crude material was purified by flash column chromatography (using petroleum ether/EtOAc = 10:1) to provide the title compound as a colorless oil in 44% yield (41 mg).  **$^1\text{H}$  NMR** (400 MHz,  $\text{CDCl}_3$ )  $\delta$  8.10 – 8.03 (m, 2H), 7.70 – 7.64 (m, 2H), 7.60 – 7.55 (m, 1H), 7.48 – 7.42 (m, 2H), 7.29 (ddd,  $J = 16.6, 9.0, 4.9$  Hz, 6H), 6.72 (d,  $J = 15.9$  Hz, 1H), 6.25 (dd,  $J = 16.0, 6.9$  Hz, 1H), 5.94 – 5.81 (m, 1H), 3.56 (dd,  $J = 14.1, 7.4$  Hz, 1H), 3.34 (dd,  $J = 14.1, 4.9$  Hz, 1H), 2.88 (s, 3H), 2.39 (s, 3H).  **$^{13}\text{C}$  NMR** (101 MHz,  $\text{CDCl}_3$ )  $\delta$  165.57, 143.49, 134.74, 134.40, 133.89, 133.23, 132.98, 129.80, 129.71, 128.86, 128.74, 128.44, 128.35, 127.96, 127.59, 127.40, 127.29, 125.02, 72.47, 53.26, 36.25, 21.45. **HRMS**: Calc'd for  $\text{C}_{25}\text{H}_{25}\text{ClNO}_4\text{S}$ ,  $[\text{M}+\text{H}]^+ 470.1187$ ; found 470.1185.

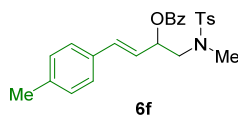

**(E)-1-((N,4-dimethylphenyl)sulfonamido)-4-(p-tolyl)but-3-en-2-yl benzoate**,  $R_f = 0.5$  (PE:EA = 5:1). The crude material was purified by flash column chromatography (using petroleum ether/EtOAc = 10:1) to provide the title compound as a colorless oil in 58% yield (52 mg).  **$^1\text{H}$**

**NMR** (400 MHz, CDCl<sub>3</sub>)  $\delta$  8.08 (d,  $J$  = 7.0 Hz, 2H), 7.67 (d,  $J$  = 8.1 Hz, 2H), 7.60 – 7.54 (m, 1H), 7.48 – 7.42 (m, 2H), 7.33 – 7.21 (m, 4H), 7.12 (d,  $J$  = 7.9 Hz, 2H), 6.73 (d,  $J$  = 15.9 Hz, 1H), 6.20 (dd,  $J$  = 15.9, 7.2 Hz, 1H), 5.85 (td,  $J$  = 7.3, 4.4 Hz, 1H), 3.59 (dd,  $J$  = 14.1, 7.7 Hz, 1H), 3.31 (dd,  $J$  = 14.1, 4.6 Hz, 1H), 2.88 (s, 3H), 2.39 (s, 3H), 2.33 (s, 3H). **<sup>13</sup>C NMR** (101 MHz, CDCl<sub>3</sub>)  $\delta$  165.63, 143.40, 138.19, 134.85, 134.35, 133.10, 133.06, 129.99, 129.72, 129.68, 129.26, 128.39, 128.31, 127.32, 126.65, 123.14, 72.68, 53.38, 36.15, 21.45, 21.20. **HRMS**: Calc'd for C<sub>26</sub>H<sub>27</sub>NO<sub>4</sub>SN<sub>a</sub>, [M+Na]<sup>+</sup> 472.1558; found 472.1552.

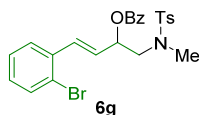

**(E)-4-(2-bromophenyl)-1-((N,4-dimethylphenyl)sulfonamido)but-3-en-2-yl benzoate**, R<sub>f</sub> = 0.5 (PE:EA = 5:1). The crude material was purified by flash column chromatography (using petroleum ether/EtOAc = 10:1) to provide the title compound as a colorless oil in 36% yield (37 mg). **<sup>1</sup>H NMR** (400 MHz, CDCl<sub>3</sub>)  $\delta$  8.09 (d,  $J$  = 6.9 Hz, 2H), 7.67 (d,  $J$  = 8.1 Hz, 2H), 7.56 (dddd,  $J$  = 13.5, 7.8, 6.3, 1.3 Hz, 3H), 7.49 – 7.43 (m, 2H), 7.34 – 7.20 (m, 3H), 7.19 – 7.03 (m, 2H), 6.26 (dd,  $J$  = 15.9, 6.6 Hz, 1H), 5.88 (dtd,  $J$  = 7.4, 5.8, 5.4, 2.7 Hz, 1H), 3.58 (dd,  $J$  = 14.1, 7.0 Hz, 1H), 3.37 (dd,  $J$  = 14.0, 5.0 Hz, 1H), 2.90 (s, 3H), 2.39 (s, 3H). **<sup>13</sup>C NMR** (101 MHz, CDCl<sub>3</sub>)  $\delta$  165.55, 143.49, 135.93, 134.79, 133.24, 132.89, 132.64, 129.76, 129.73, 129.43, 128.46, 127.58, 127.41, 127.32, 123.85, 72.23, 53.21, 36.22, 21.48. **HRMS**: Calc'd for C<sub>25</sub>H<sub>25</sub>BrNO<sub>4</sub>S, [M+H]<sup>+</sup> 514.0682; found 514.0679.

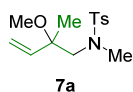

**N-(2-methoxy-2-methylbut-3-en-1-yl)-N,4-dimethylbenzenesulfonamide**, R<sub>f</sub> = 0.6 (PE:EA = 5:1). The crude material was purified by flash column chromatography (using petroleum ether/EtOAc = 10:1) to provide the title compound as a colorless oil in 41% yield (23 mg). **<sup>1</sup>H NMR** (400 MHz, CDCl<sub>3</sub>)  $\delta$  7.63 (d,  $J$  = 8.3 Hz, 2H), 7.29 (d,  $J$  = 8.0 Hz, 2H), 5.74 (dd,  $J$  = 17.6, 10.9 Hz, 1H), 5.35 – 5.14 (m, 2H), 3.16 – 3.08 (m, 4H), 2.91 – 2.81 (m, 4H), 1.38 (s, 3H). **<sup>13</sup>C NMR** (101 MHz, CDCl<sub>3</sub>)  $\delta$  143.14, 139.98, 134.86, 129.59, 127.35, 116.79, 78.83, 58.83, 50.07, 37.52, 21.46, 18.37. **HRMS**: Calc'd for C<sub>14</sub>H<sub>22</sub>NO<sub>3</sub>S, [M+H]<sup>+</sup> 284.1315; found 284.1314.

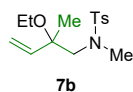

**N-(2-ethoxy-2-methylbut-3-en-1-yl)-N,4-dimethylbenzenesulfonamide**, R<sub>f</sub> = 0.6 (PE:EA = 5:1). The crude material was purified by flash column chromatography (using petroleum ether/EtOAc = 10:1) to provide the title compound as a colorless oil in 37% yield (22 mg). **<sup>1</sup>H NMR** (400 MHz, CDCl<sub>3</sub>)  $\delta$  7.64 (d,  $J$  = 8.3 Hz, 2H), 7.30 (d,  $J$  = 8.0 Hz, 2H), 5.87 – 5.65 (m, 1H), 5.32 – 5.16 (m, 2H), 3.39 – 3.22 (m, 2H), 3.12 (d,  $J$  = 13.8 Hz, 1H), 2.91 – 2.81 (m, 4H), 2.42 (s, 3H), 1.39 (s, 3H), 1.10 (t,  $J$  = 7.0 Hz, 3H). **<sup>13</sup>C NMR** (101 MHz, CDCl<sub>3</sub>)  $\delta$  143.09, 140.62, 134.89, 129.58, 127.36, 116.18, 78.54, 59.09, 57.66, 37.52, 21.46, 19.12, 15.87. **HRMS**: Calc'd for C<sub>15</sub>H<sub>24</sub>NO<sub>3</sub>S, [M+H]<sup>+</sup> 298.1471; found 298.1470.

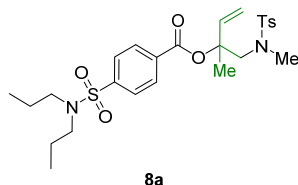

8a

**1-((N,4-dimethylphenyl)sulfonamido)-2-methylbut-3-en-2-yl 4-(N,N-dipropylsulfamoyl)benzoate**,  $R_f = 0.4$  (PE:EA = 3:1). The crude material was purified by flash column chromatography (using petroleum ether/EtOAc = 6:1) to provide the title compound as a colorless oil in 85% yield (91 mg). **<sup>1</sup>H NMR** (400 MHz, CDCl<sub>3</sub>)  $\delta$  8.25 – 8.00 (m, 2H), 7.84 (d,  $J = 8.1$  Hz, 2H), 7.74 – 7.59 (m, 2H), 7.32 (d,  $J = 8.0$  Hz, 2H), 6.14 (ddd,  $J = 17.6, 11.0, 1.0$  Hz, 1H), 5.46 – 5.18 (m, 2H), 3.56 (d,  $J = 14.6$  Hz, 1H), 3.40 (d,  $J = 14.6$  Hz, 1H), 3.15 – 2.99 (m, 4H), 2.83 (s, 3H), 2.42 (s, 3H), 1.81 (s, 3H), 1.53 (q,  $J = 7.8$  Hz, 4H), 0.85 (td,  $J = 7.3, 1.1$  Hz, 6H). **<sup>13</sup>C NMR** (101 MHz, CDCl<sub>3</sub>)  $\delta$  163.93, 144.07, 143.60, 138.88, 134.40, 134.19, 130.11, 129.76, 127.32, 126.97, 115.78, 84.37, 57.79, 49.94, 37.87, 21.92, 21.73, 21.47, 11.10. **HRMS**: Calc'd for C<sub>26</sub>H<sub>37</sub>N<sub>2</sub>O<sub>6</sub>S<sub>2</sub>, [M+H]<sup>+</sup> 537.2088; found 537.2070.

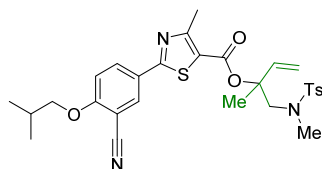

8b

**1-((N,4-dimethylphenyl)sulfonamido)-2-methylbut-3-en-2-yl 2-(3-cyano-4-isobutoxyphenyl)-4-methylthiazole-5-carboxylate**,  $R_f = 0.33$  (PE:EA = 3:1). The crude material was purified by flash column chromatography (using petroleum ether/EtOAc = 5:1) to provide the title compound as a white solid in 73% yield (83 mg). **<sup>1</sup>H NMR** (400 MHz, CDCl<sub>3</sub>)  $\delta$  8.12 (d,  $J = 2.3$  Hz, 1H), 8.07 (dd,  $J = 8.8, 2.3$  Hz, 1H), 7.66 (d,  $J = 8.2$  Hz, 2H), 7.32 (d,  $J = 8.1$  Hz, 2H), 6.99 (d,  $J = 8.9$  Hz, 1H), 6.13 (dd,  $J = 17.5, 11.0$  Hz, 1H), 5.50 – 5.07 (m, 2H), 3.88 (d,  $J = 6.5$  Hz, 2H), 3.54 (d,  $J = 14.6$  Hz, 1H), 3.35 (d,  $J = 14.6$  Hz, 1H), 2.87 (s, 3H), 2.71 (s, 3H), 2.42 (s, 3H), 2.18 (dt,  $J = 13.3, 6.7$  Hz, 1H), 1.80 (s, 3H), 1.08 (s, 3H), 1.06 (s, 3H). **<sup>13</sup>C NMR** (101 MHz, CDCl<sub>3</sub>)  $\delta$  166.91, 162.46, 161.76, 160.55, 143.53, 138.90, 134.55, 132.51, 132.01, 129.74, 127.29, 125.75, 121.57, 115.68, 115.31, 112.58, 102.82, 84.97, 77.20, 75.60, 57.62, 37.66, 28.06, 21.91, 21.45, 18.96, 17.37. **HRMS**: Calc'd for C<sub>29</sub>H<sub>34</sub>N<sub>3</sub>O<sub>5</sub>S<sub>2</sub>, [M+H]<sup>+</sup> 568.1934; found 568.1921.

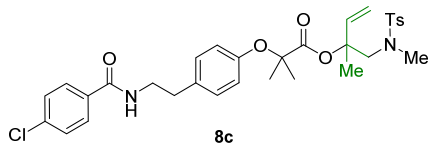

8c

**1-((N,4-dimethylphenyl)sulfonamido)-2-methylbut-3-en-2-yl 2-(4-(2-(4-chlorobenzamido)ethyl)phenoxy)-2-methylpropanoate**,  $R_f = 0.2$  (PE:EA = 2:1). The crude material was purified by flash column chromatography (using petroleum ether/EtOAc = 2:1) to provide the title compound as a white solid in 67% yield (82 mg). **<sup>1</sup>H NMR** (400 MHz, CDCl<sub>3</sub>)  $\delta$  7.72 (d,  $J = 8.2$  Hz, 2H), 7.50 (d,  $J = 7.9$  Hz, 2H), 7.34 (d,  $J = 8.2$  Hz, 2H), 7.27 (d,  $J = 7.7$  Hz, 2H), 7.06 (d,  $J = 8.1$  Hz, 2H), 6.75 (d,  $J = 6.0$  Hz, 1H), 6.69 (d,  $J = 8.1$  Hz, 2H), 5.94 (dd,  $J = 17.6, 10.9$  Hz, 1H), 5.41 – 5.17 (m, 2H), 3.67 (dt,  $J = 12.5, 6.4$  Hz, 1H), 3.57 (dt,  $J = 13.2, 6.4$  Hz, 1H), 3.25 (d,  $J = 14.5$  Hz, 1H), 2.88 (td,  $J = 14.0, 7.8$  Hz, 3H), 2.53 (s, 3H), 2.40 (s, 3H), 1.68 (s, 3H), 1.58 (s, 6H). **<sup>13</sup>C NMR** (101 MHz, CDCl<sub>3</sub>)  $\delta$  172.70, 166.62, 153.82, 143.56, 138.37, 137.30, 134.15, 133.04, 132.43,

129.69, 129.64, 128.61, 128.49, 127.17, 117.43, 116.06, 84.33, 78.55, 59.09, 41.85, 37.36, 34.48, 26.31, 23.97, 21.44, 19.77. **HRMS**: Calc'd for C<sub>32</sub>H<sub>38</sub>ClN<sub>2</sub>O<sub>6</sub>S, [M+H]<sup>+</sup> 613.2134; found 613.2116.

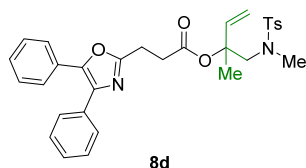

**1-((N,4-dimethylphenyl)sulfonamido)-2-methylbut-3-en-2-yl**

**3-(4,5-diphenyloxazol-2-yl)propanoate**, R<sub>f</sub> = 0.25 (PE:EA = 4:1). The crude material was purified by flash column chromatography (using petroleum ether/EtOAc = 5:1) to provide the title compound as a yellow solid in 82% yield (89 mg). **<sup>1</sup>H NMR** (400 MHz, CDCl<sub>3</sub>) δ 7.64 – 7.58 (m, 4H), 7.57 – 7.52 (m, 2H), 7.40 – 7.26 (m, 8H), 6.02 (dd, *J* = 17.5, 11.0 Hz, 1H), 5.34 – 5.16 (m, 2H), 3.39 (d, *J* = 14.5 Hz, 1H), 3.20 (d, *J* = 14.6 Hz, 1H), 3.14 (t, *J* = 7.1 Hz, 2H), 2.88 (t, *J* = 7.0 Hz, 2H), 2.79 (s, 3H), 2.41 (s, 3H), 1.70 (s, 3H). **<sup>13</sup>C NMR** (101 MHz, CDCl<sub>3</sub>) δ 170.56, 161.65, 145.36, 143.37, 139.04, 134.94, 134.54, 132.28, 129.66, 128.80, 128.56, 128.47, 128.41, 127.99, 127.76, 127.27, 126.40, 115.35, 83.69, 57.52, 37.61, 31.87, 23.27, 21.57, 21.43. **HRMS**: Calc'd for C<sub>31</sub>H<sub>33</sub>N<sub>2</sub>O<sub>5</sub>S, [M+H]<sup>+</sup> 545.2105; found 545.2093.

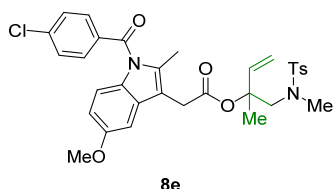

**1-((N,4-dimethylphenyl)sulfonamido)-2-methylbut-3-en-2-yl**

**2-(1-(4-chlorobenzoyl)-5-methoxy-2-methyl-1H-indol-3-yl)acetate**, R<sub>f</sub> = 0.46 (PE:EA = 2:1). The crude material was purified by flash column chromatography (using petroleum ether/EtOAc = 2:1) to provide the title compound as a yellow oil in 77% yield (94 mg). **<sup>1</sup>H NMR** (400 MHz, CDCl<sub>3</sub>) δ 7.61 (dd, *J* = 12.6, 8.4 Hz, 4H), 7.52 – 7.41 (m, 2H), 7.29 (d, *J* = 8.0 Hz, 2H), 6.93 (d, *J* = 2.5 Hz, 1H), 6.85 (d, *J* = 9.0 Hz, 1H), 6.65 (dd, *J* = 9.0, 2.6 Hz, 1H), 5.99 (dd, *J* = 17.5, 10.9 Hz, 1H), 5.19 (dd, *J* = 14.3, 3.2 Hz, 2H), 3.80 (s, 3H), 3.64 (s, 2H), 3.37 (d, *J* = 14.6 Hz, 1H), 3.15 (d, *J* = 14.6 Hz, 1H), 2.62 (s, 3H), 2.41 (s, 3H), 2.35 (s, 2H), 1.66 (s, 3H). **<sup>13</sup>C NMR** (101 MHz, CDCl<sub>3</sub>) δ 169.40, 168.18, 155.95, 143.46, 139.20, 138.97, 135.65, 134.40, 133.72, 131.08, 130.62, 130.49, 129.69, 129.61, 129.05, 129.02, 127.26, 127.16, 115.35, 114.87, 112.53, 111.78, 100.96, 83.75, 57.45, 55.59, 37.38, 31.38, 21.60, 21.43, 13.29. **HRMS**: Calc'd for C<sub>32</sub>H<sub>34</sub>ClN<sub>2</sub>O<sub>6</sub>S, [M+H]<sup>+</sup> 609.1821; found 609.1806.

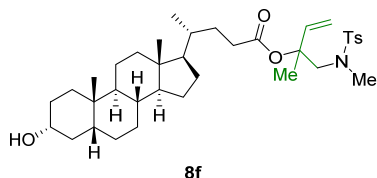

**1-((N,4-dimethylphenyl)sulfonamido)-2-methylbut-3-en-2-yl**

**(4R)-4-((3R,5R,8R,9S,10S,13R,14S,17R)-3-hydroxy-10,13-dimethylhexadecahydro-1H-cyclopenta[a]phenanthren-17-yl)pentanoate**, R<sub>f</sub> = 0.23 (PE:EA = 3:1). The crude material was purified by flash column chromatography (using petroleum ether/EtOAc = 5:1) to provide the title compound as a colorless oil in 69% yield (87 mg). **<sup>1</sup>H NMR** (400 MHz, CDCl<sub>3</sub>) δ 7.72 – 7.48 (m, 2H), 7.35 – 7.22 (m, 2H), 6.00 (ddd, *J* = 17.5, 11.0, 2.2 Hz, 1H), 5.35 – 5.10 (m, 2H), 3.66 – 3.49 (m, 1H), 3.37 (dd,

$J = 14.5, 2.5$  Hz, 1H), 3.18 (dd,  $J = 14.4, 4.7$  Hz, 1H), 2.81 (s, 3H), 2.42 (s, 3H), 2.28 (dddd,  $J = 15.4, 10.2, 5.3, 1.7$  Hz, 1H), 2.18 – 2.10 (m, 1H), 1.92 (dt,  $J = 12.3, 2.9$  Hz, 1H), 1.85 – 1.62 (m, 10H), 1.58 – 1.45 (m, 2H), 1.41 – 1.31 (m, 6H), 1.28 – 1.17 (m, 4H), 1.14 – 0.97 (m, 6H), 0.91 – 0.81 (m, 7H), 0.61 (s, 3H).  **$^{13}\text{C}$  NMR** (101 MHz,  $\text{CDCl}_3$ )  $\delta$  172.84, 143.40, 139.37, 134.56, 129.68, 127.31, 115.11, 82.92, 71.74, 57.73, 56.38, 55.82, 42.63, 41.98, 40.30, 40.06, 37.53, 36.32, 35.74, 35.25, 35.18, 34.48, 32.18, 30.80, 30.42, 28.12, 27.10, 26.33, 24.11, 23.30, 21.50, 21.47, 20.72, 18.19, 11.96. **HRMS:** Calc'd for  $\text{C}_{37}\text{H}_{58}\text{NO}_5\text{S}$ ,  $[\text{M}+\text{H}]^+$  628.4030; found 628.4013.

## S10 NMR Spectra

### $^1\text{H}$ NMR (400 MHz, $\text{CDCl}_3$ )

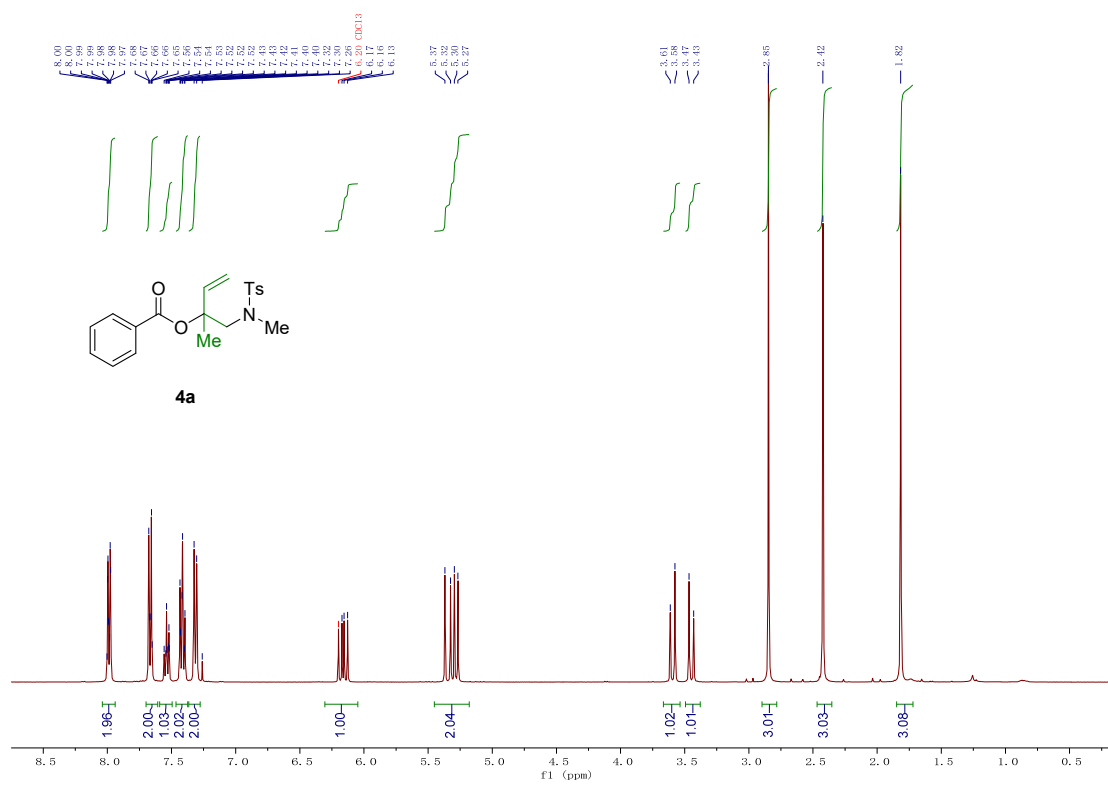

### $^{13}\text{C}$ NMR (101 MHz, $\text{CDCl}_3$ )

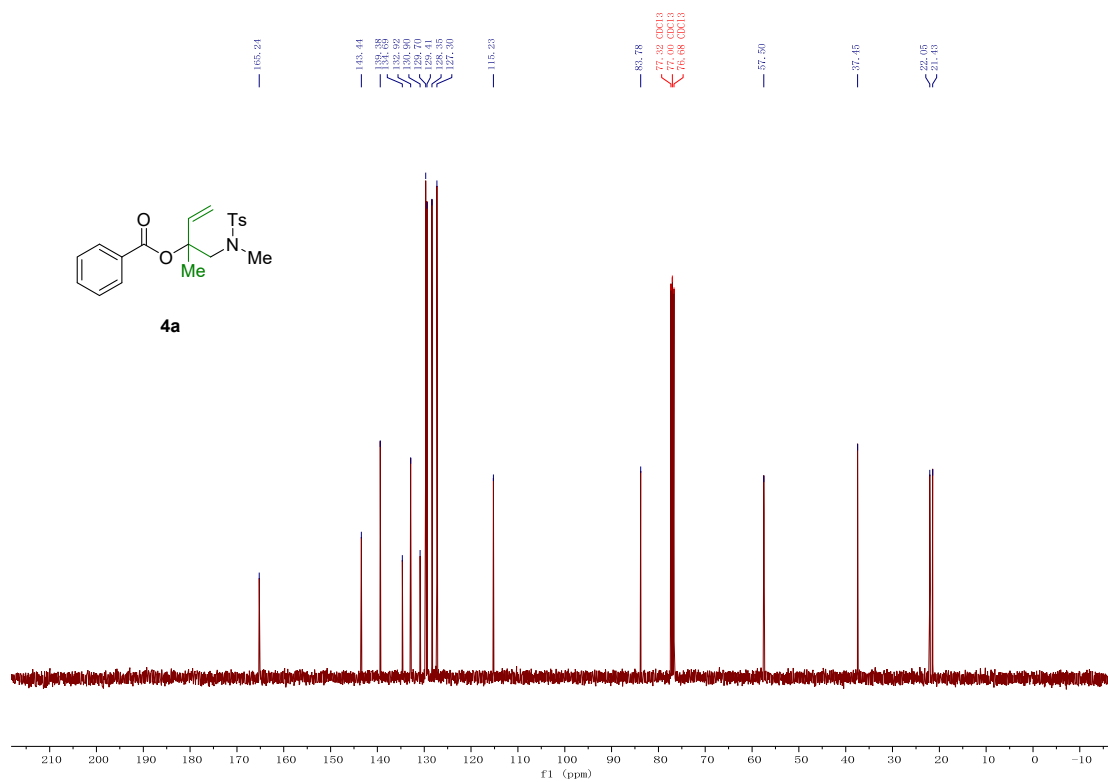

**<sup>1</sup>H NMR (400 MHz, CDCl<sub>3</sub>)**

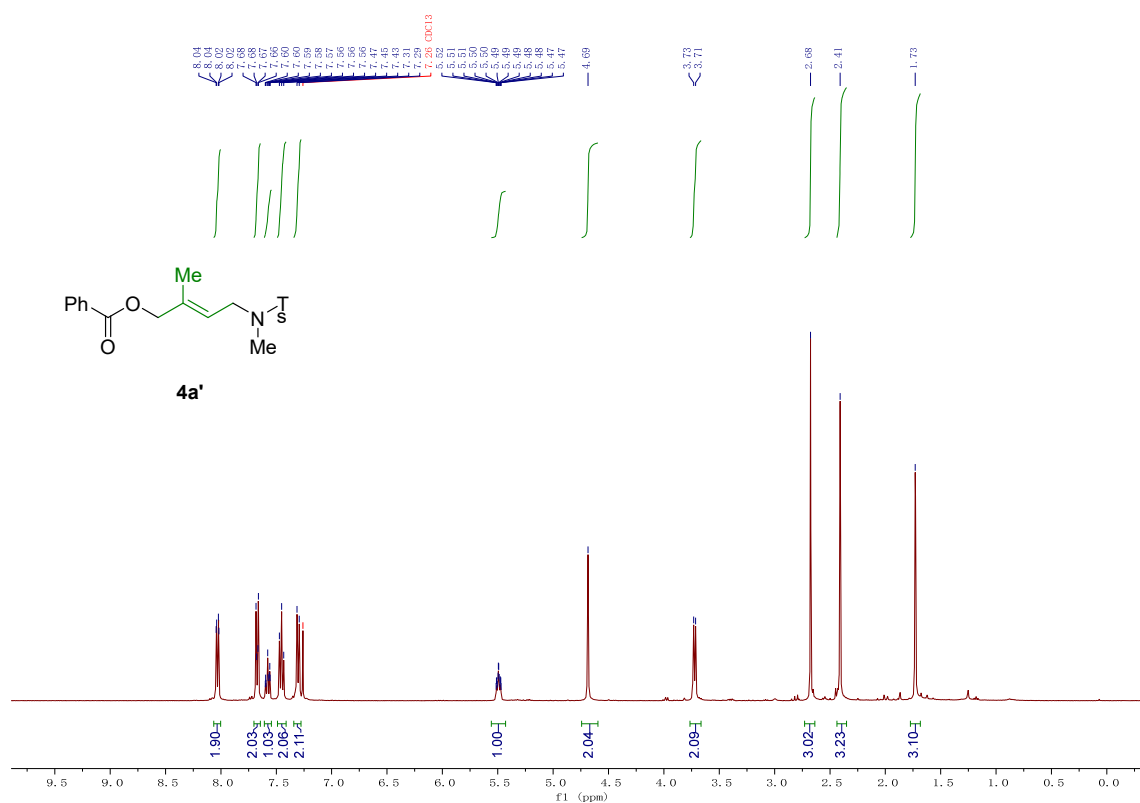

**<sup>13</sup>C NMR (101 MHz, CDCl<sub>3</sub>)**

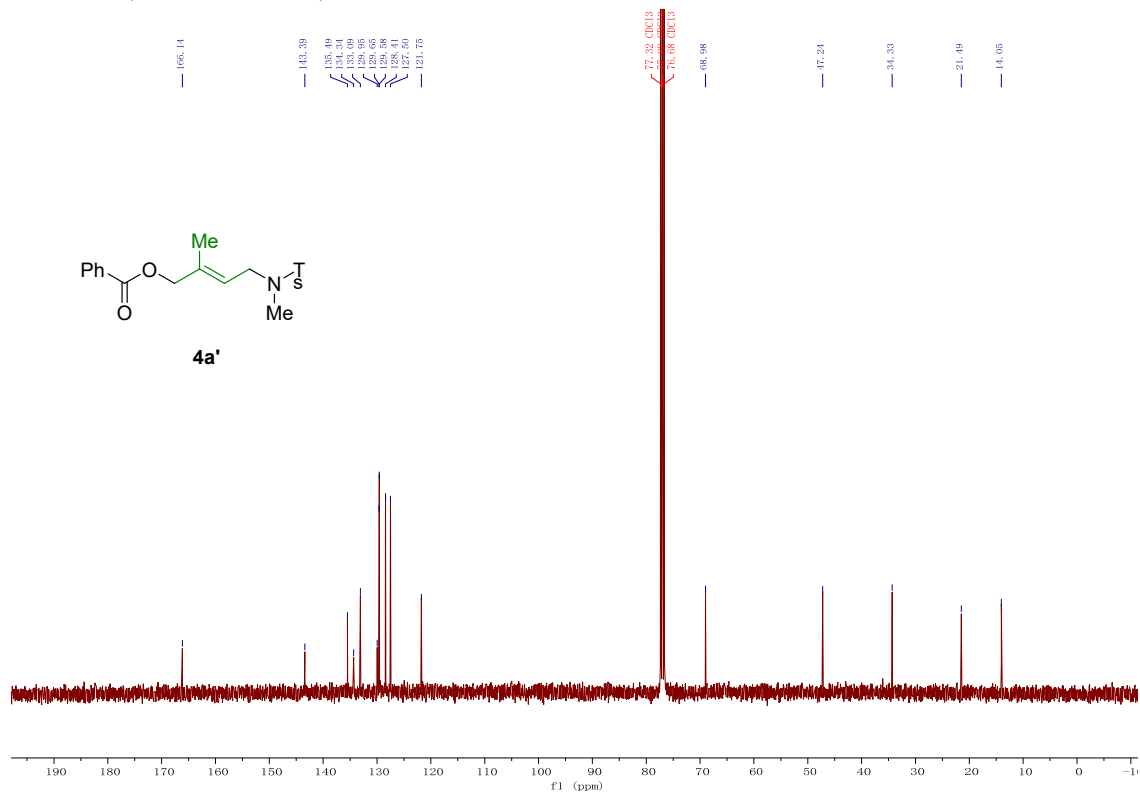

Chemical structure of **4a''** is shown as an inset. The structure is a phenyl ester derivative of a substituted allylamine, specifically (E)-1-methyl-2-methyl-3-((phenylcarbamoyloxy)methyl)prop-1-ene.

The  $^1\text{H}$  NMR spectrum (CDCl<sub>3</sub>) shows the following peaks and integrations:

- Aromatic protons (7.2–7.8 ppm): Integration 1.97, 1.92, 1.03, 1.95, 2.27.
- Methine proton (5.6 ppm): Integration 1.00.
- Methyl groups (5.1 and 1.9 ppm): Integration 1.00, 1.02.
- Methoxy group (3.7 ppm): Integration 1.03.
- N-methyl group (2.9 ppm): Integration 1.02.
- Phenyl ring protons (1.9 ppm): Integration 3.05.
- Methyl group (1.9 ppm): Integration 3.04.
- Methyl group (1.9 ppm): Integration 3.07.

**4a''**

Chemical structure of **4a''** is shown as an inset. The spectrum displays peaks corresponding to the structure, with the following chemical shifts (ppm) labeled above the peaks:

- 165.46
- 143.41
- 140.76
- 134.73
- 133.42
- 132.88
- 129.67
- 127.31
- 114.37
- 77.32, 77.06, 76.83 (CDCl<sub>3</sub>)
- 52.13
- 35.82
- 21.46
- 18.54

**<sup>1</sup>H NMR (400 MHz, CDCl<sub>3</sub>)**

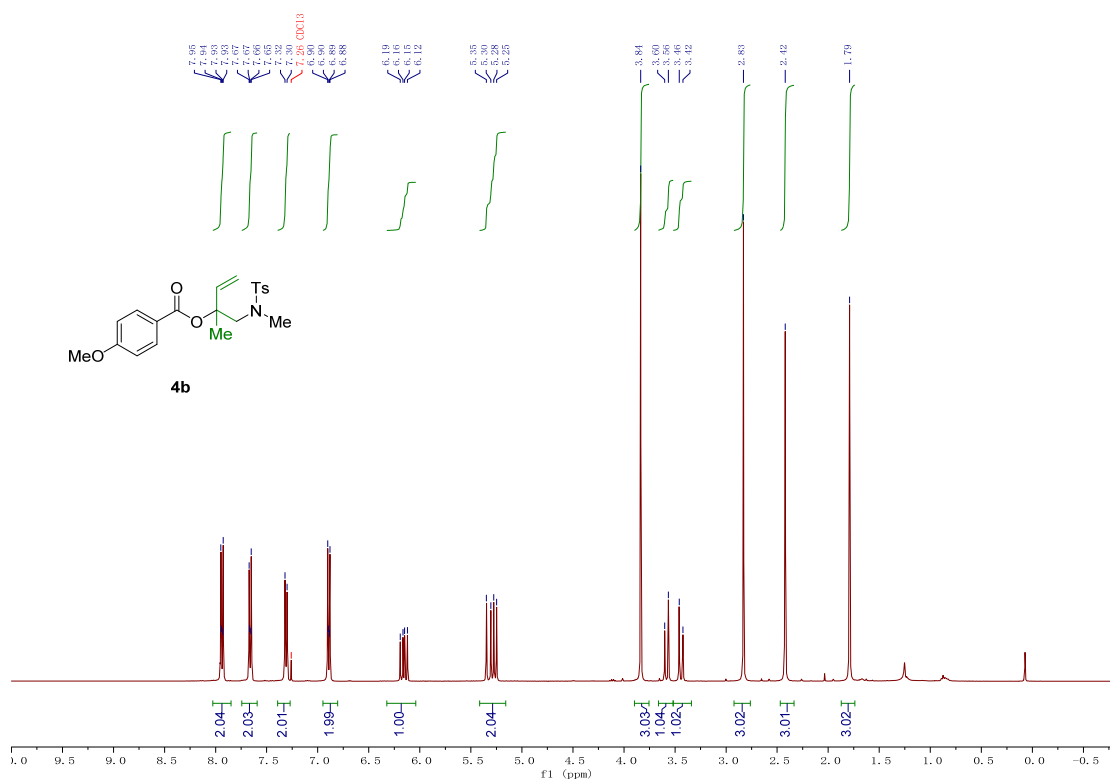

**<sup>13</sup>C NMR (101 MHz, CDCl<sub>3</sub>)**

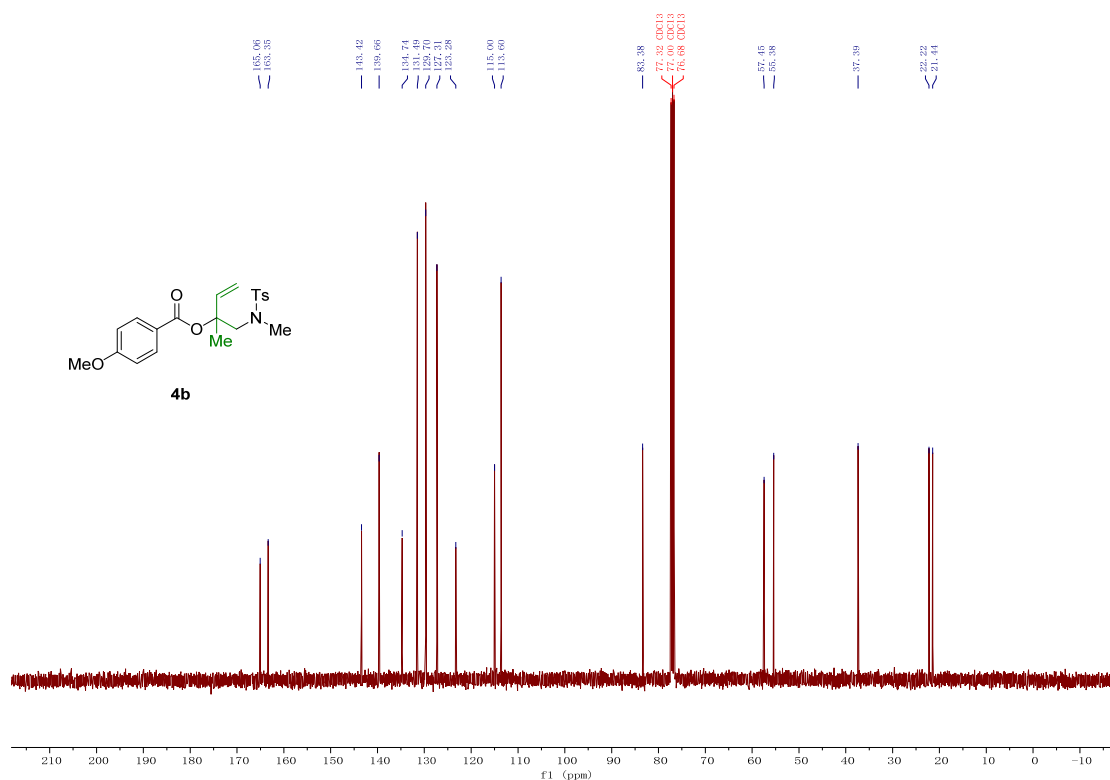

**<sup>1</sup>H NMR (400 MHz, CDCl<sub>3</sub>)**

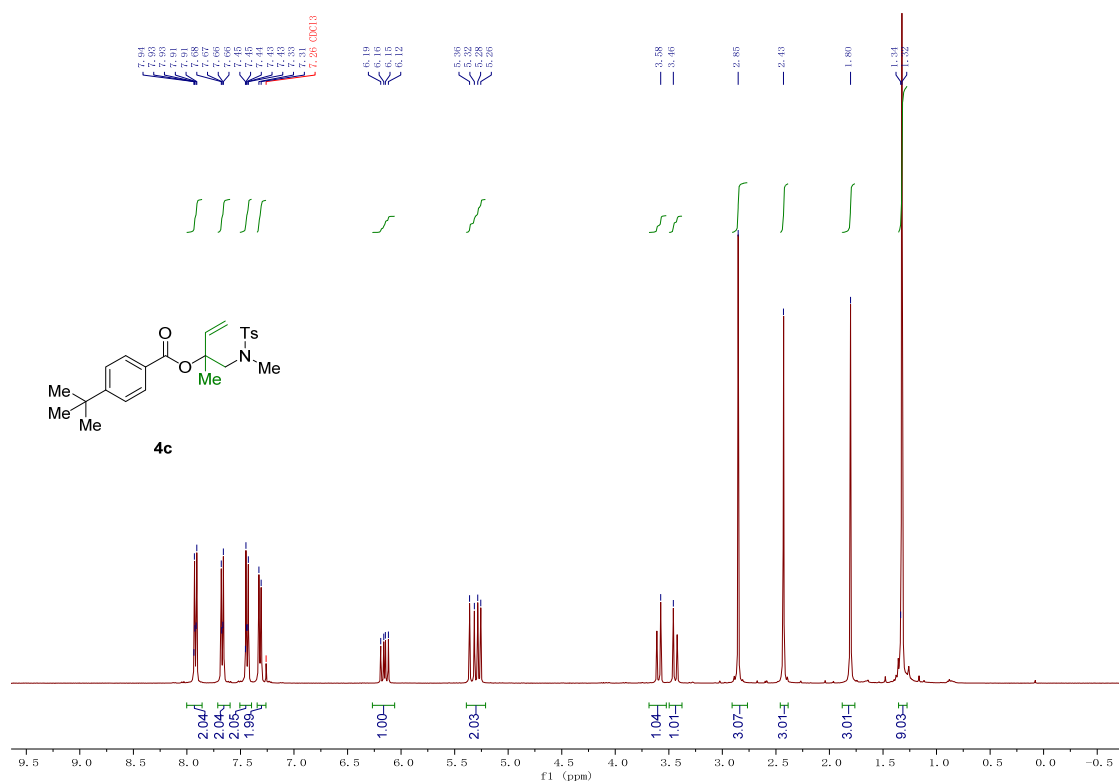

**<sup>13</sup>C NMR (101 MHz, CDCl<sub>3</sub>)**

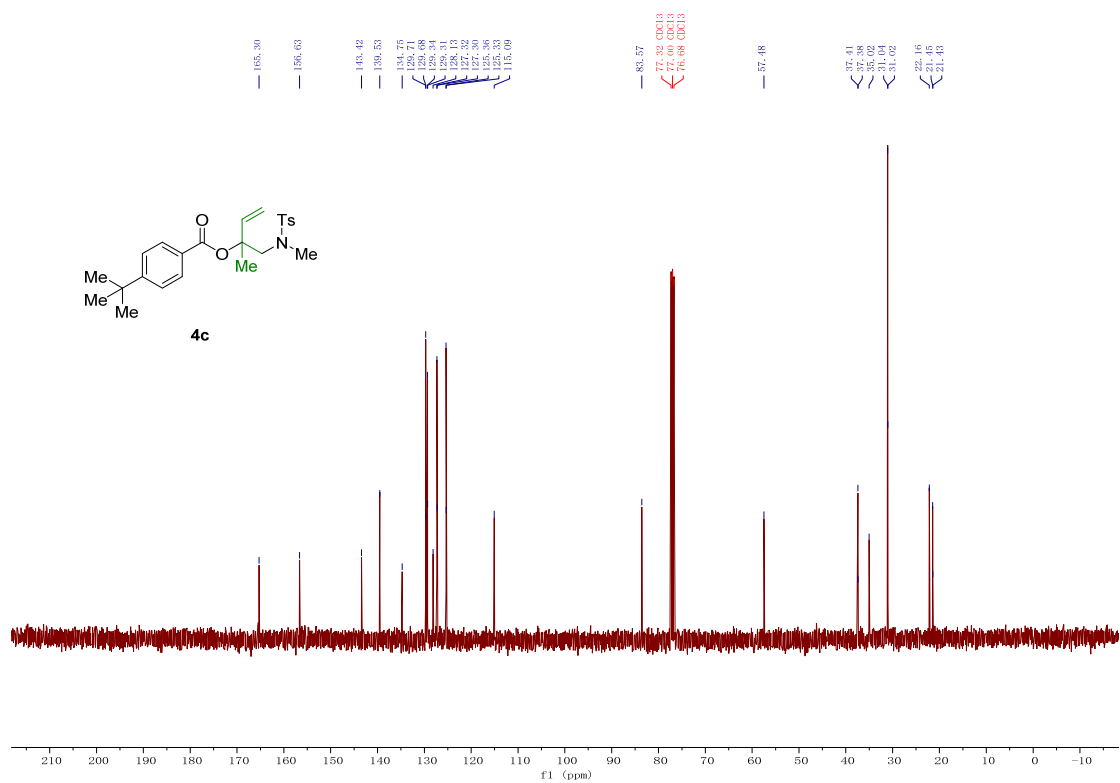

**<sup>1</sup>H NMR (400 MHz, CDCl<sub>3</sub>)**

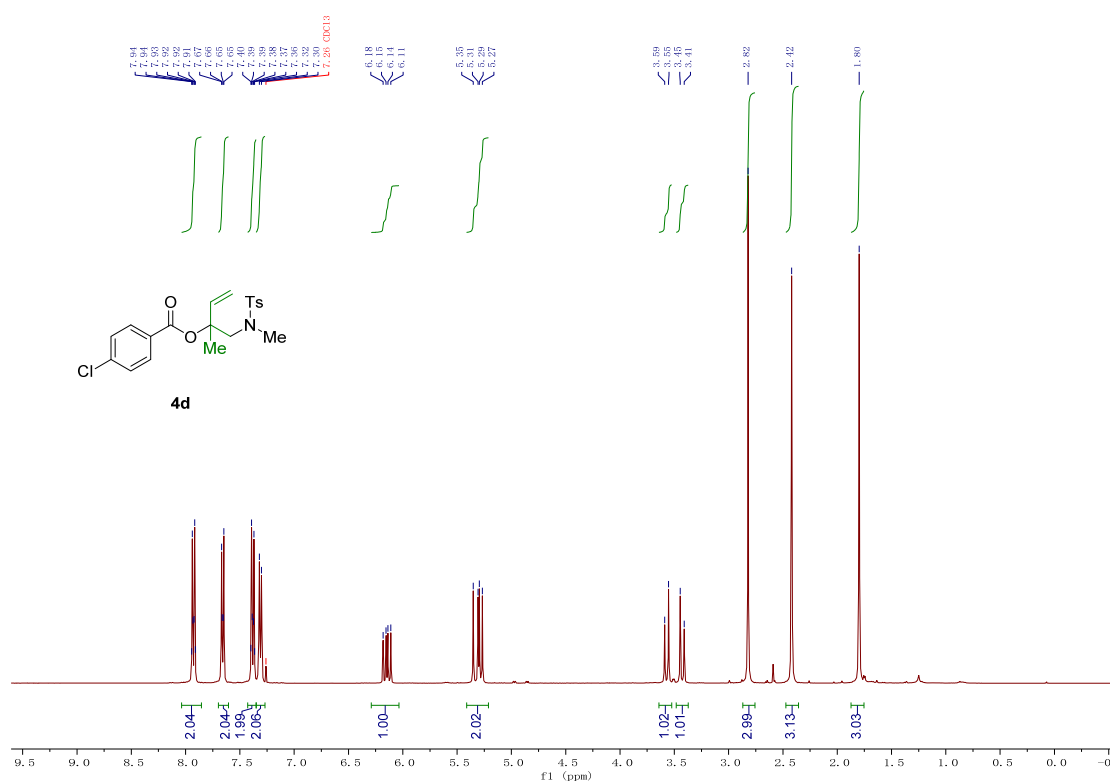

**<sup>13</sup>C NMR (101 MHz, CDCl<sub>3</sub>)**

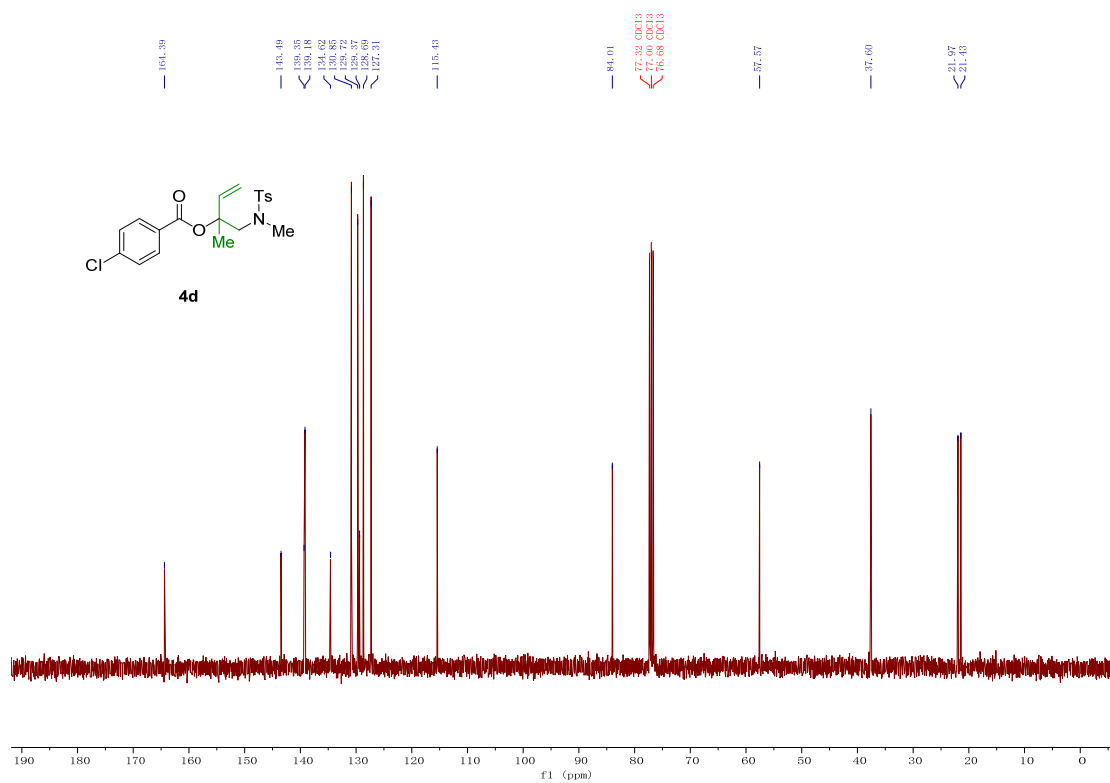

**<sup>1</sup>H NMR (400 MHz, CDCl<sub>3</sub>)**

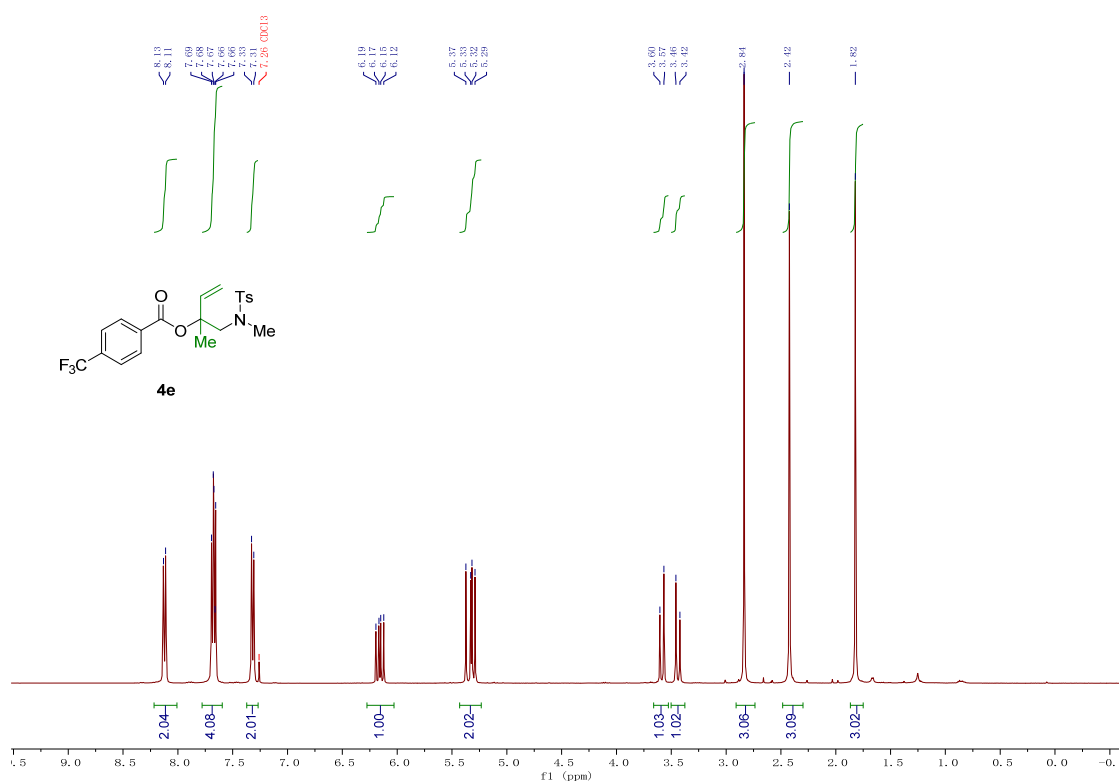

**<sup>13</sup>C NMR (101 MHz, CDCl<sub>3</sub>)**

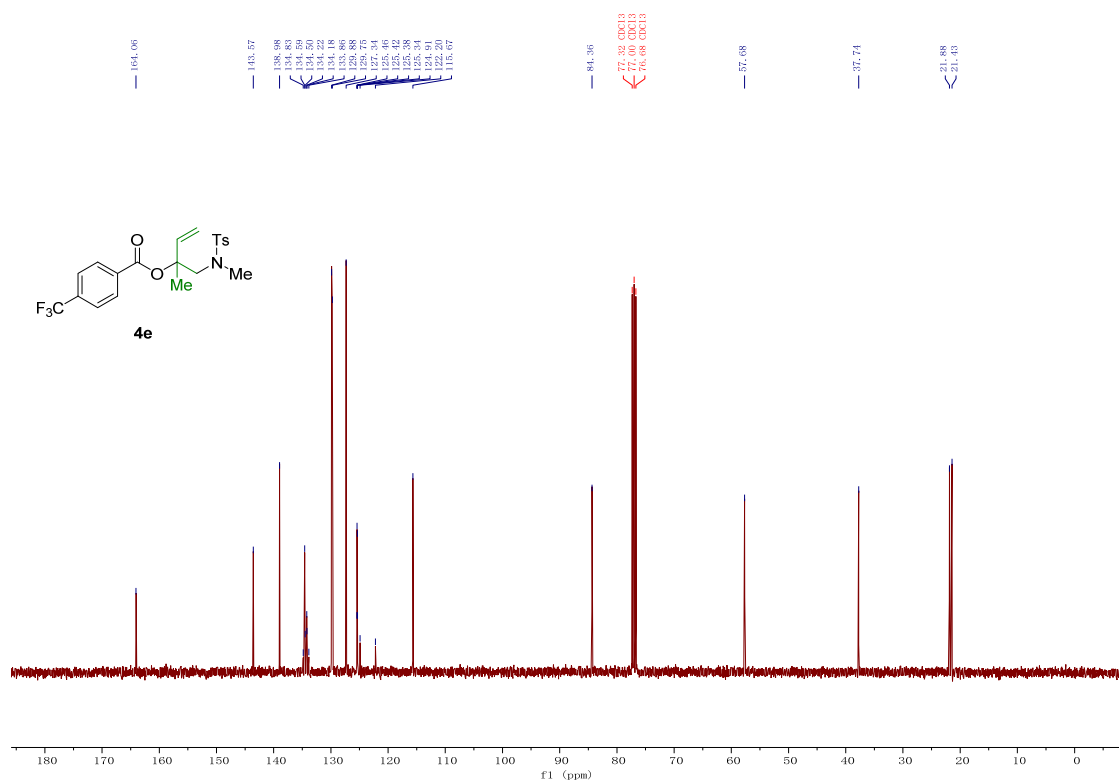

**$^{19}\text{F}$  NMR (377 MHz,  $\text{CDCl}_3$ )**

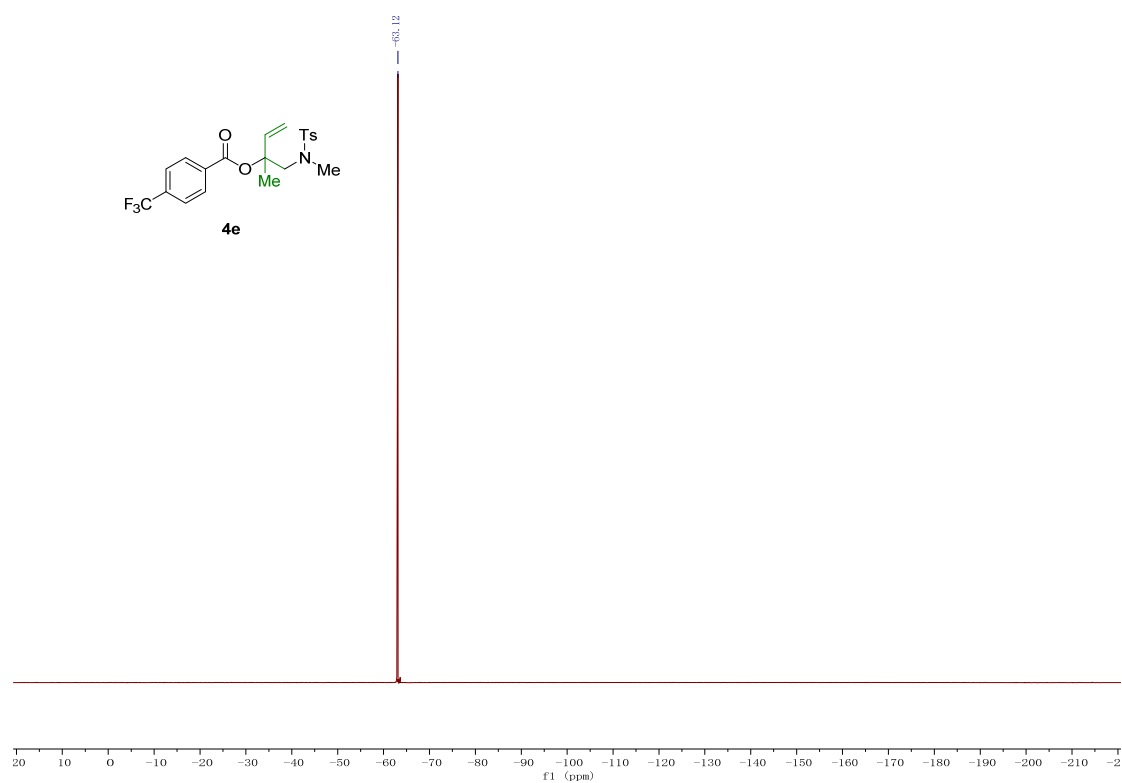

**<sup>1</sup>H NMR (400 MHz, CDCl<sub>3</sub>)**

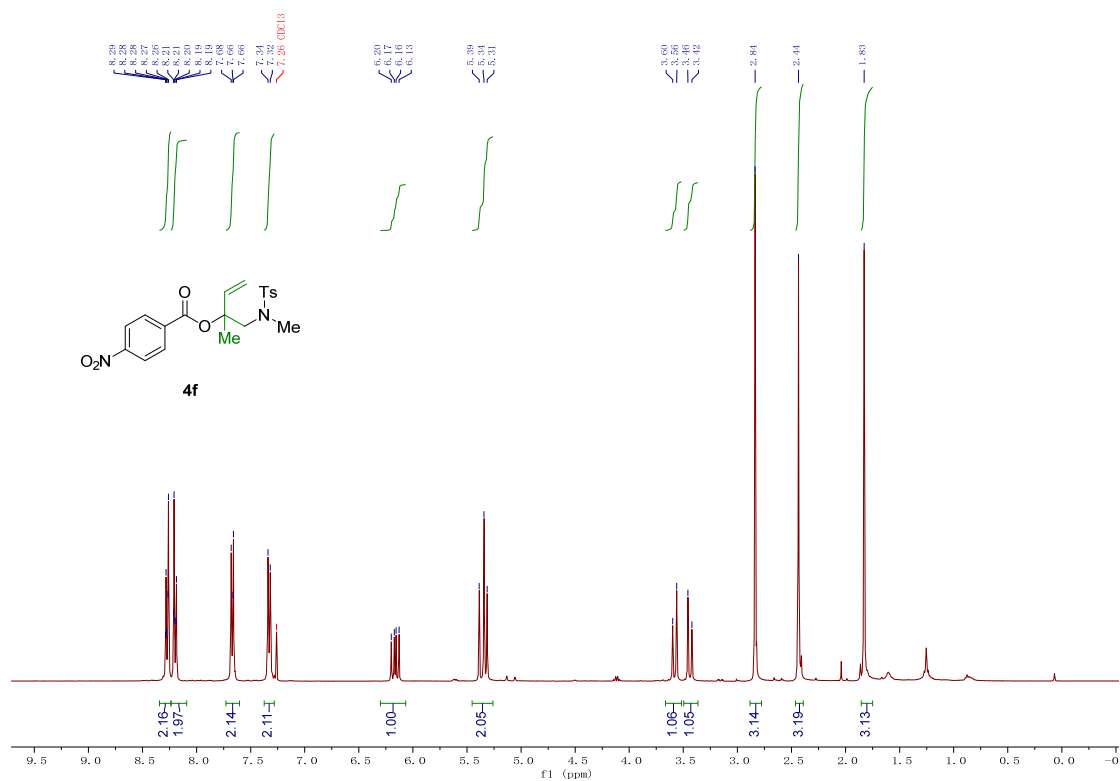

**<sup>13</sup>C NMR (101 MHz, CDCl<sub>3</sub>)**

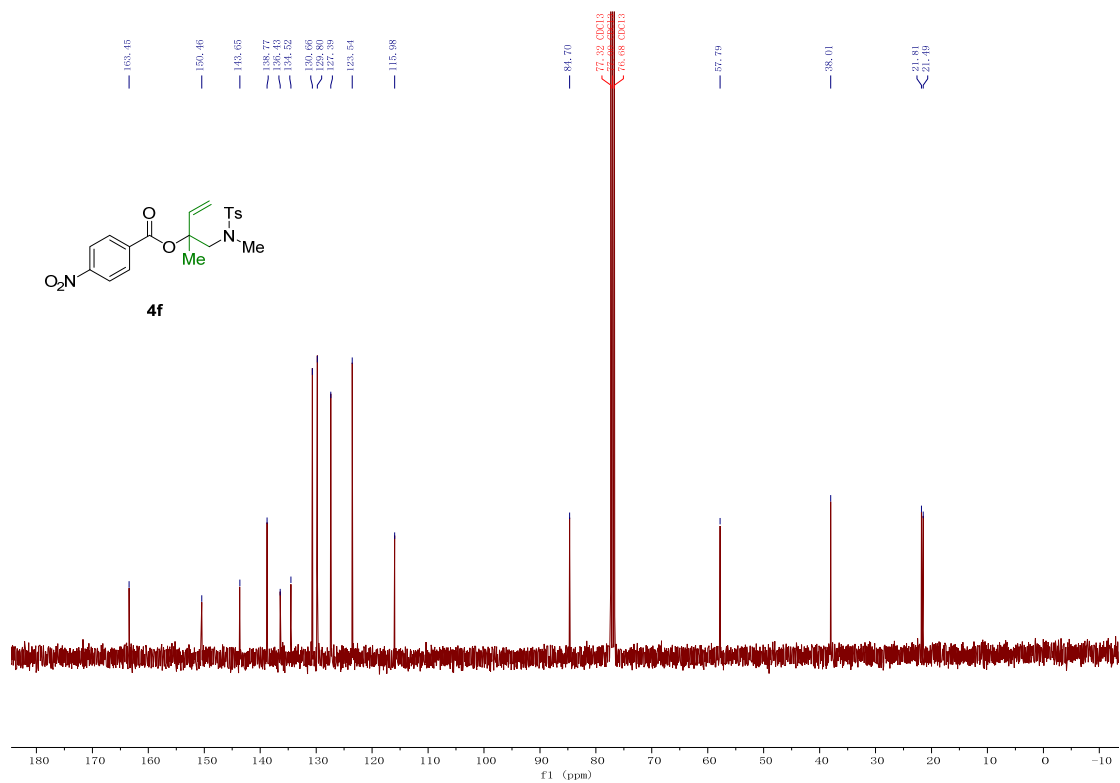

**<sup>1</sup>H NMR (400 MHz, CDCl<sub>3</sub>)**

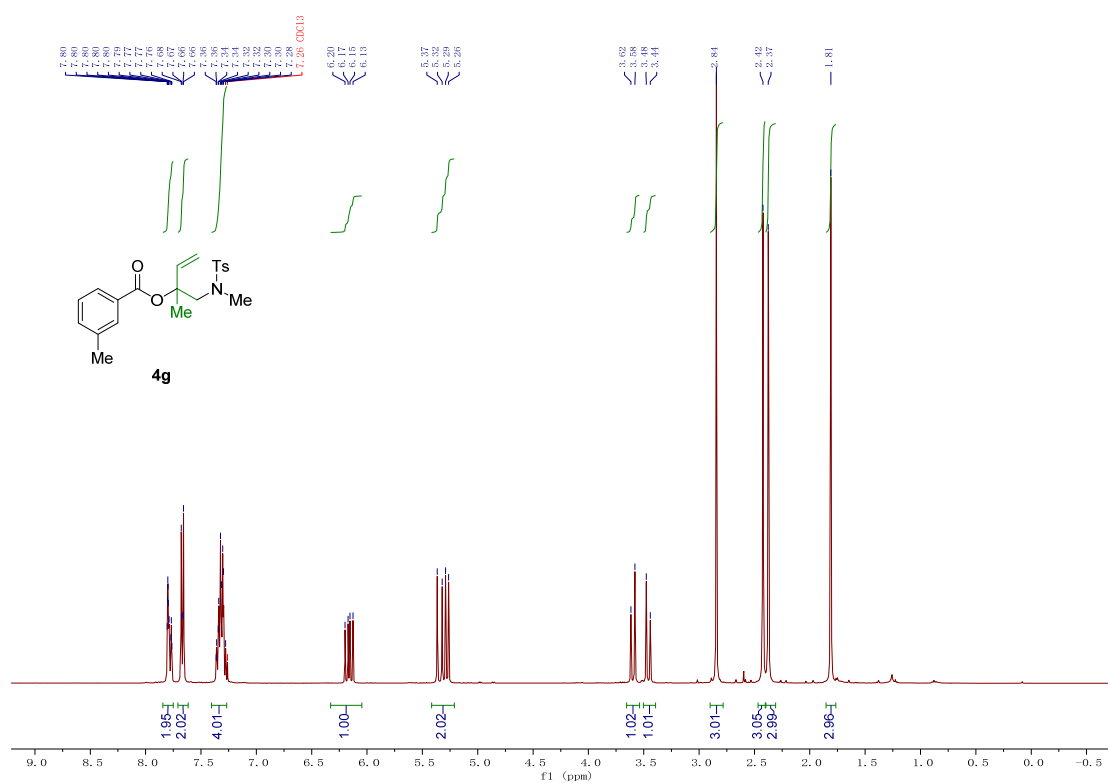

**<sup>13</sup>C NMR (101 MHz, CDCl<sub>3</sub>)**

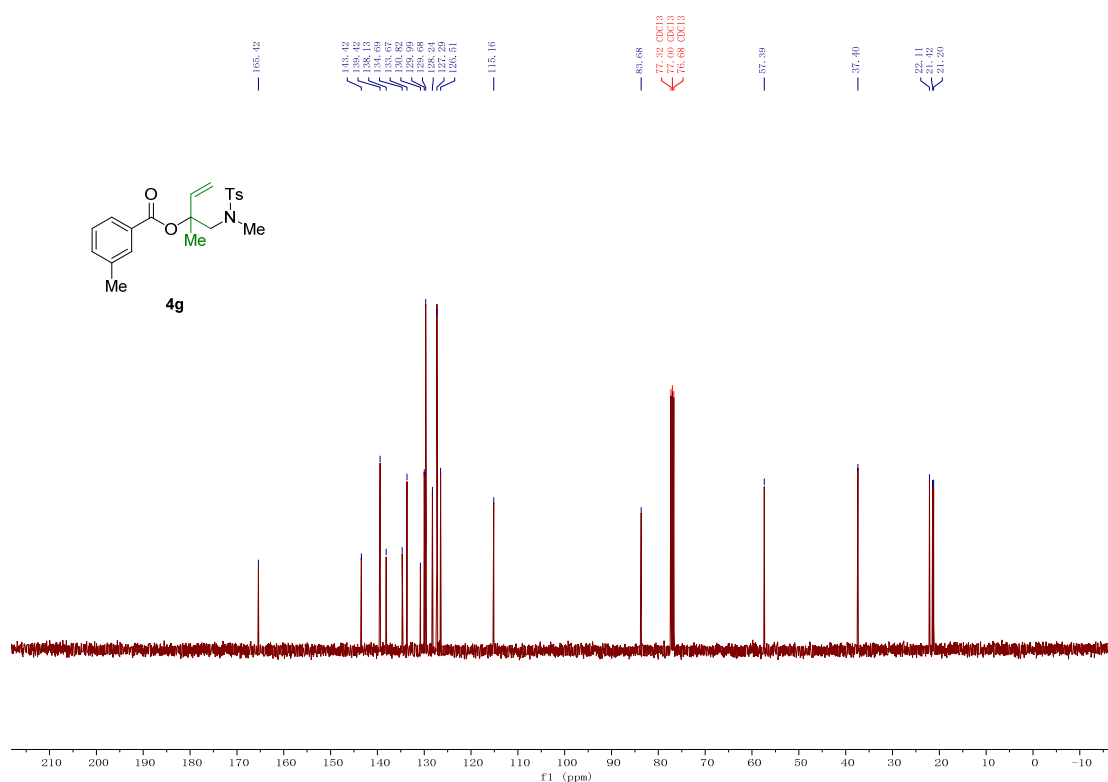

[illegible]

**4h**

CCN(Cc1ccc(O)cc1)C(=O)OC(C)=C

165.27  
155.98  
143.62  
139.23  
134.55  
132.21  
132.05  
129.66  
127.34  
121.66  
120.31  
118.27  
116.46  
83.88  
77.32 CDCl<sub>3</sub>  
76.68 CDCl<sub>3</sub>  
57.75  
37.61  
21.97  
21.46

f1 (ppm)

**4i**

COc1ccc(cc1)C(=O)OC(C)C(C)N(C)C2=CC=CC=C2

<sup>1</sup>H NMR spectrum (CDCl<sub>3</sub>) of compound **4i**. The spectrum shows peaks corresponding to the structure, with integration values indicated below the peaks.

| Chemical Shift (ppm)                                                                                                                                                                                                                                                                                                                                                                                                                                                                                                                                                                                                                                                                                                                                                                                                                                                                                                                                                                                                                                                                                                                                                                                                                                                                                                                                                                                                                                                                                                                                                                                                                                                                                                                                                                                                                                                                                                                                                                                                                                                                                                                                                                                                                                                                                                                                                                                                                                                                                                                                                                                                                                                                                                                                                                                                                                                                                                                                                                                                                                                                                                                                                                                                                                                                                                                                                                                                                                                                                                                                                                                                                                                                                                                                                                                                                                                                                                                                                                              | Integration |
|---------------------------------------------------------------------------------------------------------------------------------------------------------------------------------------------------------------------------------------------------------------------------------------------------------------------------------------------------------------------------------------------------------------------------------------------------------------------------------------------------------------------------------------------------------------------------------------------------------------------------------------------------------------------------------------------------------------------------------------------------------------------------------------------------------------------------------------------------------------------------------------------------------------------------------------------------------------------------------------------------------------------------------------------------------------------------------------------------------------------------------------------------------------------------------------------------------------------------------------------------------------------------------------------------------------------------------------------------------------------------------------------------------------------------------------------------------------------------------------------------------------------------------------------------------------------------------------------------------------------------------------------------------------------------------------------------------------------------------------------------------------------------------------------------------------------------------------------------------------------------------------------------------------------------------------------------------------------------------------------------------------------------------------------------------------------------------------------------------------------------------------------------------------------------------------------------------------------------------------------------------------------------------------------------------------------------------------------------------------------------------------------------------------------------------------------------------------------------------------------------------------------------------------------------------------------------------------------------------------------------------------------------------------------------------------------------------------------------------------------------------------------------------------------------------------------------------------------------------------------------------------------------------------------------------------------------------------------------------------------------------------------------------------------------------------------------------------------------------------------------------------------------------------------------------------------------------------------------------------------------------------------------------------------------------------------------------------------------------------------------------------------------------------------------------------------------------------------------------------------------------------------------------------------------------------------------------------------------------------------------------------------------------------------------------------------------------------------------------------------------------------------------------------------------------------------------------------------------------------------------------------------------------------------------------------------------------------------------------------------------|-------------|
| 7.68, 7.66, 7.65, 7.60, 7.59, 7.58, 7.57, 7.56, 7.55, 7.54, 7.53, 7.52, 7.50, 7.49, 7.09, 7.08, 7.07, 7.05, 7.04, 7.03, 7.02, 7.01, 7.00, 6.99, 6.98, 6.97, 6.96, 6.95, 6.94, 6.93, 6.92, 6.91, 6.90, 6.89, 6.88, 6.87, 6.86, 6.85, 6.84, 6.83, 6.82, 6.81, 6.80, 6.79, 6.78, 6.77, 6.76, 6.75, 6.74, 6.73, 6.72, 6.71, 6.70, 6.69, 6.68, 6.67, 6.66, 6.65, 6.64, 6.63, 6.62, 6.61, 6.60, 6.59, 6.58, 6.57, 6.56, 6.55, 6.54, 6.53, 6.52, 6.51, 6.50, 6.49, 6.48, 6.47, 6.46, 6.45, 6.44, 6.43, 6.42, 6.41, 6.40, 6.39, 6.38, 6.37, 6.36, 6.35, 6.34, 6.33, 6.32, 6.31, 6.30, 6.29, 6.28, 6.27, 6.26, 6.25, 6.24, 6.23, 6.22, 6.21, 6.20, 6.19, 6.18, 6.17, 6.16, 6.15, 6.14, 6.13, 6.12, 6.11, 6.10, 6.09, 6.08, 6.07, 6.06, 6.05, 6.04, 6.03, 6.02, 6.01, 6.00, 5.99, 5.98, 5.97, 5.96, 5.95, 5.94, 5.93, 5.92, 5.91, 5.90, 5.89, 5.88, 5.87, 5.86, 5.85, 5.84, 5.83, 5.82, 5.81, 5.80, 5.79, 5.78, 5.77, 5.76, 5.75, 5.74, 5.73, 5.72, 5.71, 5.70, 5.69, 5.68, 5.67, 5.66, 5.65, 5.64, 5.63, 5.62, 5.61, 5.60, 5.59, 5.58, 5.57, 5.56, 5.55, 5.54, 5.53, 5.52, 5.51, 5.50, 5.49, 5.48, 5.47, 5.46, 5.45, 5.44, 5.43, 5.42, 5.41, 5.40, 5.39, 5.38, 5.37, 5.36, 5.35, 5.34, 5.33, 5.32, 5.31, 5.30, 5.29, 5.28, 5.27, 5.26, 5.25, 5.24, 5.23, 5.22, 5.21, 5.20, 5.19, 5.18, 5.17, 5.16, 5.15, 5.14, 5.13, 5.12, 5.11, 5.10, 5.09, 5.08, 5.07, 5.06, 5.05, 5.04, 5.03, 5.02, 5.01, 5.00, 4.99, 4.98, 4.97, 4.96, 4.95, 4.94, 4.93, 4.92, 4.91, 4.90, 4.89, 4.88, 4.87, 4.86, 4.85, 4.84, 4.83, 4.82, 4.81, 4.80, 4.79, 4.78, 4.77, 4.76, 4.75, 4.74, 4.73, 4.72, 4.71, 4.70, 4.69, 4.68, 4.67, 4.66, 4.65, 4.64, 4.63, 4.62, 4.61, 4.60, 4.59, 4.58, 4.57, 4.56, 4.55, 4.54, 4.53, 4.52, 4.51, 4.50, 4.49, 4.48, 4.47, 4.46, 4.45, 4.44, 4.43, 4.42, 4.41, 4.40, 4.39, 4.38, 4.37, 4.36, 4.35, 4.34, 4.33, 4.32, 4.31, 4.30, 4.29, 4.28, 4.27, 4.26, 4.25, 4.24, 4.23, 4.22, 4.21, 4.20, 4.19, 4.18, 4.17, 4.16, 4.15, 4.14, 4.13, 4.12, 4.11, 4.10, 4.09, 4.08, 4.07, 4.06, 4.05, 4.04, 4.03, 4.02, 4.01, 4.00, 3.99, 3.98, 3.97, 3.96, 3.95, 3.94, 3.93, 3.92, 3.91, 3.90, 3.89, 3.88, 3.87, 3.86, 3.85, 3.84, 3.83, 3.82, 3.81, 3.80, 3.79, 3.78, 3.77, 3.76, 3.75, 3.74, 3.73, 3.72, 3.71, 3.70, 3.69, 3.68, 3.67, 3.66, 3.65, 3.64, 3.63, 3.62, 3.61, 3.60, 3.59, 3.58, 3.57, 3.56, 3.55, 3.54, 3.53, 3.52, 3.51, 3.50, 3.49, 3.48, 3.47, 3.46, 3.45, 3.44, 3.43, 3.42, 3.41, 3.40, 3.39, 3.38, 3.37, 3.36, 3.35, 3.34, 3.33, 3.32, 3.31, 3.30, 3.29, 3.28, 3.27, 3.26, 3.25, 3.24, 3.23, 3.22, 3.21, 3.20, 3.19, 3.18, 3.17, 3.16, 3.15, 3.14, 3.13, 3.12, 3.11, 3.10, 3.09, 3.08, 3.07, 3.06, 3.05, 3.04, 3.03, 3.02, 3.01, 3.00, 2.99, 2.98, 2.97, 2.96, 2.95, 2.94, 2.93, 2.92, 2.91, 2.90, 2.89, 2.88, 2.87, 2.86, 2.85, 2.84, 2.83, 2.82, 2.81, 2.80, 2.79, 2.78, 2.77, 2.76, 2.75, 2.74, 2.73, 2.72, 2.71, 2.70, 2.69, 2.68, 2.67, 2.66, 2.65, 2.64, 2.63, 2.62, 2.61, 2.60, 2.59, 2.58, 2.57, 2.56, 2.55, 2.54, 2.53, 2.52, 2.51, 2.50, 2.49, 2.48, 2.47, 2.46, 2.45, 2.44, 2.43, 2.42, 2.41, 2.40, 2.39, 2.38, 2.37, 2.36, 2.35, 2.34, 2.33, 2.32, 2.31, 2.30, 2.29, 2.28, 2.27, 2.26, 2.25, 2.24, 2.23, 2.22, 2.21, 2.20, 2.19, 2.18, 2.17, 2.16, 2.15, 2.14, 2.13, 2.12, 2.11, 2.10, 2.09, 2.08, 2.07, 2.06, 2.05, 2.04, 2.03, 2.02, 2.01, 2.00, 1.99, 1.98, 1.97, 1.96, 1.95, 1.94, 1.93, 1.92, 1.91, 1.90, 1.89, 1.88, 1.87, 1.86, 1.85, 1.84, 1.83, 1.82, 1.81, 1.80, 1.79, 1.78, 1.77, 1.76, 1.75, 1.74, 1.73, 1.72, 1.71, 1.70, 1.69, 1.68, 1.67, 1.66, 1.65, 1.64, 1.63, 1.62, 1.61, 1.60, 1.59, 1.58, 1.57, 1.56, 1.55, 1.54, 1.53, 1.52, 1.51, 1.50, 1.49, 1.48, 1.47, 1.46, 1.45, 1.44, 1.43, 1.42, 1.41, 1.40, 1.39, 1.38, 1.37, 1.36, 1.35, 1.34, 1.33, 1.32, 1.31, 1.30, 1.29, 1.28, 1.27, 1.26, 1.25, 1.24, 1.23, 1.22, 1.21, 1.20, 1.19, 1.18, 1.17, 1.16, 1.15, 1.14, 1.13, 1.12, 1.11, 1.10, 1.09, 1.08, 1.07, 1.06, 1.05, 1.04, 1.03, 1.02, 1.01, 1.00, 0.99, 0.98, 0.97, 0.96, 0.95, 0.94, 0.93, 0.92, 0.91, 0.90, 0.89, 0.88, 0.87, 0.86, 0.85, 0.84, 0.83, 0 |             |

**4i**

<sup>1</sup>H NMR spectrum (CDCl<sub>3</sub>) of compound **4i**. The spectrum shows peaks corresponding to the structure, with integration values indicated above the peaks.

Chemical structure of **4i** is shown above the spectrum.

Integration values (from left to right): 1.05, 1.2, 1.59, 5.4, 1.43, 4.6, 1.39, 3.5, 1.34, 7.0, 1.32, 2.1, 1.29, 7.1, 1.32, 2.5, 1.37, 3.2, 1.91, 7.7, 1.9, 4.1, 1.16, 2.8, 1.14, 0.1, 8.3, 7.7, 7.7, 3.2, 0.01, 3, 7.7, 0.01, 3, 7.7, 0.01, 3, 5.2, 7.2, 5.5, 3.8, 3.7, 5.3, 2.1, 5.5, 2.1, 4.4.

**<sup>1</sup>H NMR (400 MHz, CDCl<sub>3</sub>)**

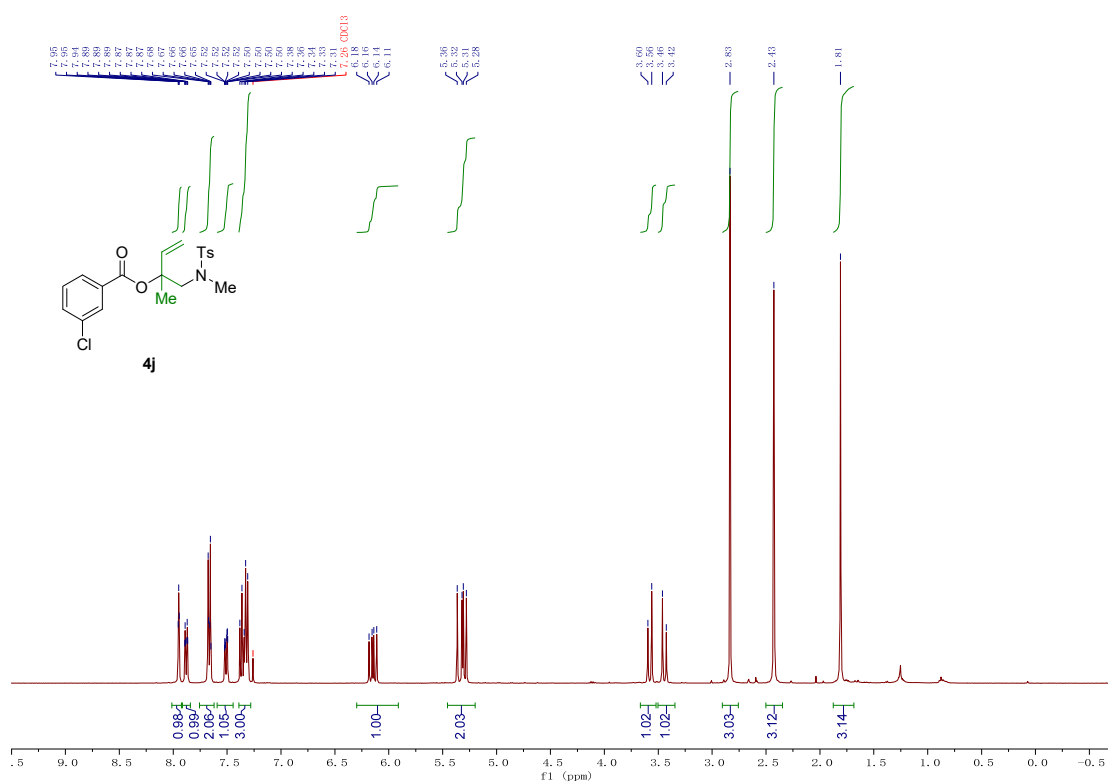

**<sup>13</sup>C NMR (101 MHz, CDCl<sub>3</sub>)**

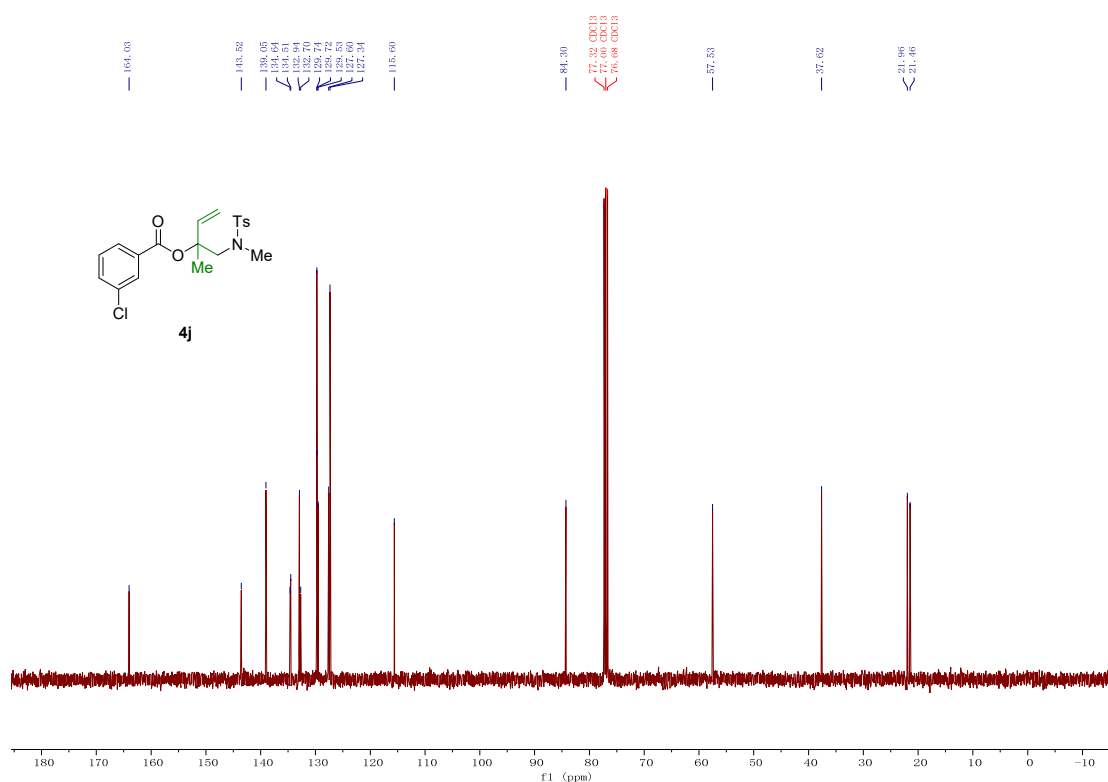

**4k**

CC(C)(C=C)C(=O)c1ccc(C(F)(F)F)cc1

<sup>1</sup>H NMR spectrum (CDCl<sub>3</sub>) of compound **4k**. The x-axis represents the chemical shift in ppm (f1), ranging from -0.5 to 9.5. The spectrum shows several multiplets and singlets, with integration values indicated below the baseline and chemical shifts listed above the peaks.

Chemical shifts (ppm) listed above the peaks:

- 8.25, 8.21, 8.19, 8.16, 7.79, 7.71, 7.66, 7.60, 7.59, 7.57, 7.56, 7.54, 7.53, 7.51, 7.26 (CDCl<sub>3</sub>), 6.29, 6.17, 6.15, 6.13, 5.98, 5.93, 5.92, 5.90, 3.61, 3.58, 3.57, 3.55, 3.13, 2.87, 2.87, 2.87, 2.85, 2.46, 2.44, 2.43, 1.85, 1.84, 1.83

Integration values (below the baseline):

- 1.05, 0.95, 1.04, 2.05, 1.04, 2.07, 1.00, 2.04, 1.03, 1.04, 3.05, 3.14, 3.06

**4k**

CN(C)C(C=C)OC(=O)c1ccc(C(F)(F)F)cc1

Chemical structure of **4k** is shown. The structure is a substituted benzene ring with a trifluoromethyl group (CF<sub>3</sub>) and a (4-methylphenyl)carbamate group. The carbamate group is highlighted in green in the original image.

<sup>1</sup>H NMR spectrum (CDCl<sub>3</sub>) of **4k** is shown. The spectrum displays peaks corresponding to the protons in the molecule. The x-axis represents the chemical shift in ppm, ranging from 0 to 10. The peaks are labeled with their chemical shifts (ppm):

- 7.73 (d, 2H, aromatic)
- 7.32 (d, 2H, aromatic)
- 7.29 (d, 2H, aromatic)
- 7.26 (d, 2H, aromatic)
- 7.23 (d, 2H, aromatic)
- 7.20 (d, 2H, aromatic)
- 7.17 (d, 2H, aromatic)
- 7.14 (d, 2H, aromatic)
- 7.11 (d, 2H, aromatic)
- 7.08 (d, 2H, aromatic)
- 7.05 (d, 2H, aromatic)
- 7.02 (d, 2H, aromatic)
- 7.00 (d, 2H, aromatic)
- 6.97 (d, 2H, aromatic)
- 6.94 (d, 2H, aromatic)
- 6.91 (d, 2H, aromatic)
- 6.88 (d, 2H, aromatic)
- 6.85 (d, 2H, aromatic)
- 6.82 (d, 2H, aromatic)
- 6.79 (d, 2H, aromatic)
- 6.76 (d, 2H, aromatic)
- 6.73 (d, 2H, aromatic)
- 6.70 (d, 2H, aromatic)
- 6.67 (d, 2H, aromatic)
- 6.64 (d, 2H, aromatic)
- 6.61 (d, 2H, aromatic)
- 6.58 (d, 2H, aromatic)
- 6.55 (d, 2H, aromatic)
- 6.52 (d, 2H, aromatic)
- 6.49 (d, 2H, aromatic)
- 6.46 (d, 2H, aromatic)
- 6.43 (d, 2H, aromatic)
- 6.40 (d, 2H, aromatic)
- 6.37 (d, 2H, aromatic)
- 6.34 (d, 2H, aromatic)
- 6.31 (d, 2H, aromatic)
- 6.28 (d, 2H, aromatic)
- 6.25 (d, 2H, aromatic)
- 6.22 (d, 2H, aromatic)
- 6.19 (d, 2H, aromatic)
- 6.16 (d, 2H, aromatic)
- 6.13 (d, 2H, aromatic)
- 6.10 (d, 2H, aromatic)
- 6.07 (d, 2H, aromatic)
- 6.04 (d, 2H, aromatic)
- 6.01 (d, 2H, aromatic)
- 5.98 (d, 2H, aromatic)
- 5.95 (d, 2H, aromatic)
- 5.92 (d, 2H, aromatic)
- 5.89 (d, 2H, aromatic)
- 5.86 (d, 2H, aromatic)
- 5.83 (d, 2H, aromatic)
- 5.80 (d, 2H, aromatic)
- 5.77 (d, 2H, aromatic)
- 5.74 (d, 2H, aromatic)
- 5.71 (d, 2H, aromatic)
- 5.68 (d, 2H, aromatic)
- 5.65 (d, 2H, aromatic)
- 5.62 (d, 2H, aromatic)
- 5.59 (d, 2H, aromatic)
- 5.56 (d, 2H, aromatic)
- 5.53 (d, 2H, aromatic)
- 5.50 (d, 2H, aromatic)
- 5.47 (d, 2H, aromatic)
- 5.44 (d, 2H, aromatic)
- 5.41 (d, 2H, aromatic)
- 5.38 (d, 2H, aromatic)
- 5.35 (d, 2H, aromatic)
- 5.32 (d, 2H, aromatic)
- 5.29 (d, 2H, aromatic)
- 5.26 (d, 2H, aromatic)
- 5.23 (d, 2H, aromatic)
- 5.20 (d, 2H, aromatic)
- 5.17 (d, 2H, aromatic)
- 5.14 (d, 2H, aromatic)
- 5.11 (d, 2H, aromatic)
- 5.08 (d, 2H, aromatic)
- 5.05 (d, 2H, aromatic)
- 5.02 (d, 2H, aromatic)
- 4.99 (d, 2H, aromatic)
- 4.96 (d, 2H, aromatic)
- 4.93 (d, 2H, aromatic)
- 4.90 (d, 2H, aromatic)
- 4.87 (d, 2H, aromatic)
- 4.84 (d, 2H, aromatic)
- 4.81 (d, 2H, aromatic)
- 4.78 (d, 2H, aromatic)
- 4.75 (d, 2H, aromatic)
- 4.72 (d, 2H, aromatic)
- 4.69 (d, 2H, aromatic)
- 4.66 (d, 2H, aromatic)
- 4.63 (d, 2H, aromatic)
- 4.60 (d, 2H, aromatic)
- 4.57 (d, 2H, aromatic)
- 4.54 (d, 2H, aromatic)
- 4.51 (d, 2H, aromatic)
- 4.48 (d, 2H, aromatic)
- 4.45 (d, 2H, aromatic)
- 4.42 (d, 2H, aromatic)
- 4.39 (d, 2H, aromatic)
- 4.36 (d, 2H, aromatic)
- 4.33 (d, 2H, aromatic)
- 4.30 (d, 2H, aromatic)
- 4.27 (d, 2H, aromatic)
- 4.24 (d, 2H, aromatic)
- 4.21 (d, 2H, aromatic)
- 4.18 (d, 2H, aromatic)
- 4.15 (d, 2H, aromatic)
- 4.12 (d, 2H, aromatic)
- 4.09 (d, 2H, aromatic)
- 4.06 (d, 2H, aromatic)
- 4.03 (d, 2H, aromatic)
- 4.00 (d, 2H, aromatic)
- 3.97 (d, 2H, aromatic)
- 3.94 (d, 2H, aromatic)
- 3.91 (d, 2H, aromatic)
- 3.88 (d, 2H, aromatic)
- 3.85 (d, 2H, aromatic)
- 3.82 (d, 2H, aromatic)
- 3.79 (d, 2H, aromatic)
- 3.76 (d, 2H, aromatic)
- 3.73 (d, 2H, aromatic)
- 3.70 (d, 2H, aromatic)
- 3.67 (d, 2H, aromatic)
- 3.64 (d, 2H, aromatic)
- 3.61 (d, 2H, aromatic)
- 3.58 (d, 2H, aromatic)
- 3.55 (d, 2H, aromatic)
- 3.52 (d, 2H, aromatic)
- 3.49 (d, 2H, aromatic)
- 3.46 (d, 2H, aromatic)
- 3.43 (d, 2H, aromatic)
- 3.40 (d, 2H, aromatic)
- 3.37 (d, 2H, aromatic)
- 3.34 (d, 2H, aromatic)
- 3.31 (d, 2H, aromatic)
- 3.28 (d, 2H, aromatic)
- 3.25 (d, 2H, aromatic)
- 3.22 (d, 2H, aromatic)
- 3.19 (d, 2H, aromatic)
- 3.16 (d, 2H, aromatic)
- 3.13 (d, 2H, aromatic)
- 3.10 (d, 2H, aromatic)
- 3.07 (d, 2H, aromatic)
- 3.04 (d, 2H, aromatic)
- 3.01 (d, 2H, aromatic)
- 2.98 (d, 2H, aromatic)
- 2.95 (d, 2H, aromatic)
- 2.92 (d, 2H, aromatic)
- 2.89 (d, 2H, aromatic)
- 2.86 (d, 2H, aromatic)
- 2.83 (d, 2H, aromatic)
- 2.80 (d, 2H, aromatic)
- 2.77 (d, 2H, aromatic)
- 2.74 (d, 2H, aromatic)
- 2.71 (d, 2H, aromatic)
- 2.68 (d, 2H, aromatic)
- 2.65 (d, 2H, aromatic)
- 2.62 (d, 2H, aromatic)
- 2.59 (d, 2H, aromatic)
- 2.56 (d, 2H, aromatic)
- 2.53 (d, 2H, aromatic)
- 2.50 (d, 2H, aromatic)
- 2.47 (d, 2H, aromatic)
- 2.44 (d, 2H, aromatic)
- 2.41 (d, 2H, aromatic)
- 2.38 (d, 2H, aromatic)
- 2.35 (d, 2H, aromatic)
- 2.32 (d, 2H, aromatic)
- 2.29 (d, 2H, aromatic)
- 2.26 (d, 2H, aromatic)
- 2.23 (d, 2H, aromatic)
- 2.20 (d, 2H, aromatic)
- 2.17 (d, 2H, aromatic)
- 2.14 (d, 2H, aromatic)
- 2.11 (d, 2H, aromatic)
- 2.08 (d, 2H, aromatic)
- 2.05 (d, 2H, aromatic)
- 2.02 (d, 2H, aromatic)
- 1.99 (d, 2H, aromatic)
- 1.96 (d, 2H, aromatic)
- 1.93 (d, 2H, aromatic)
- 1.90 (d, 2H, aromatic)
- 1.87 (d, 2H, aromatic)
- 1.84 (d, 2H, aromatic)
- 1.81 (d, 2H, aromatic)
- 1.78 (d, 2H, aromatic)
- 1.75 (d, 2H, aromatic)
- 1.72 (d, 2H, aromatic)
- 1.69 (d, 2H, aromatic)
- 1.66 (d, 2H, aromatic)
- 1.63 (d, 2H, aromatic)
- 1.60 (d, 2H, aromatic)
- 1.57 (d, 2H, aromatic)
- 1.54 (d, 2H, aromatic)
- 1.51 (d, 2H, aromatic)
- 1.48 (d, 2H, aromatic)
- 1.45 (d, 2H, aromatic)
- 1.42 (d, 2H, aromatic)
- 1.39 (d, 2H, aromatic)
- 1.36 (d, 2H, aromatic)
- 1.33 (d, 2H, aromatic)
- 1.30 (d, 2H, aromatic)
- 1.27 (d, 2H, aromatic)
- 1.24 (d, 2H, aromatic)
- 1.21 (d, 2H, aromatic)
- 1.18 (d, 2H, aromatic)
- 1.15 (d, 2H, aromatic)
- 1.12 (d, 2H, aromatic)
- 1.09 (d, 2H, aromatic)
- 1.06 (d, 2H, aromatic)
- 1.03 (d, 2H, aromatic)
- 1.00 (d, 2H, aromatic)
- 0.97 (d, 2H, aromatic)
- 0.94 (d, 2H, aromatic)
- 0.91 (d, 2H, aromatic)
- 0.88 (d, 2H, aromatic)
- 0.85 (d, 2H, aromatic)
- 0.82 (d, 2H, aromatic)
- 0.79 (d, 2H, aromatic)
- 0.76 (d, 2H, aromatic)
- 0.73 (d, 2H, aromatic)
- 0.70 (d, 2H, aromatic)
- 0.67 (d, 2H, aromatic)
- 0.64 (d, 2H, aromatic)
- 0.61 (d, 2H, aromatic)
- 0.58 (d, 2H, aromatic)
- 0.55 (d, 2H, aromatic)
- 0.52 (d, 2H, aromatic)
- 0.49 (d, 2

**$^{19}\text{F}$  NMR (377 MHz,  $\text{CDCl}_3$ )**

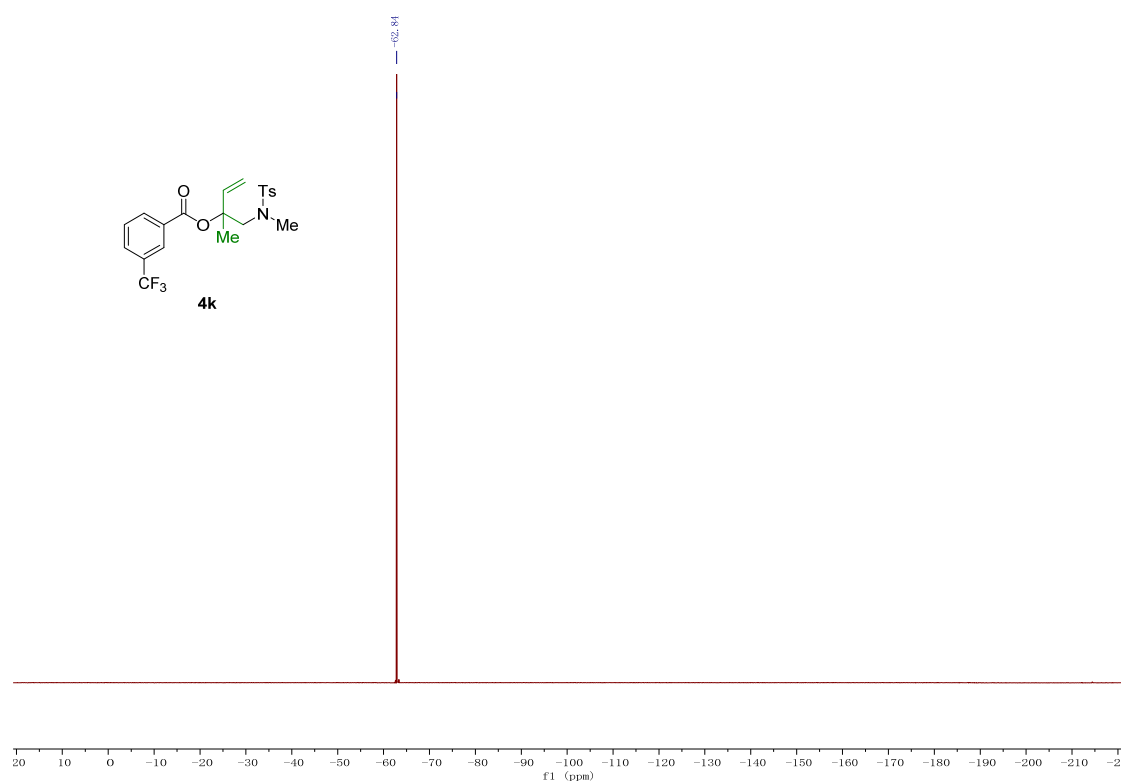

**<sup>1</sup>H NMR (400 MHz, CDCl<sub>3</sub>)**

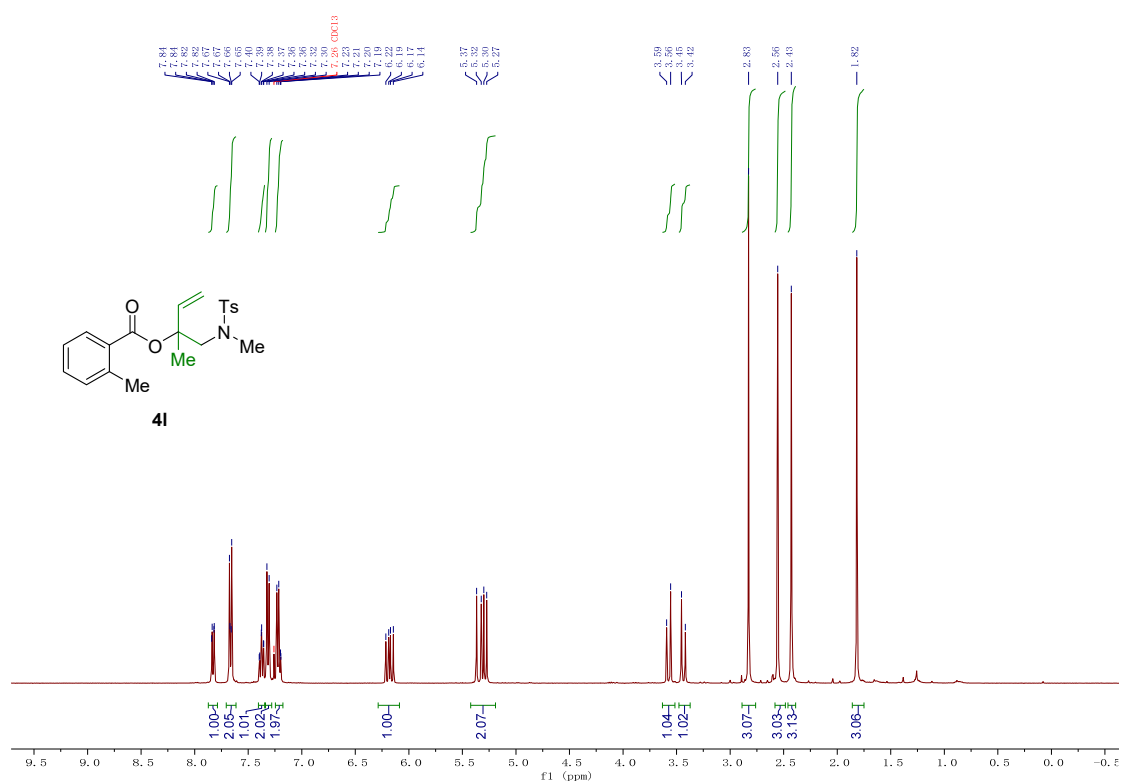

**<sup>13</sup>C NMR (101 MHz, CDCl<sub>3</sub>)**

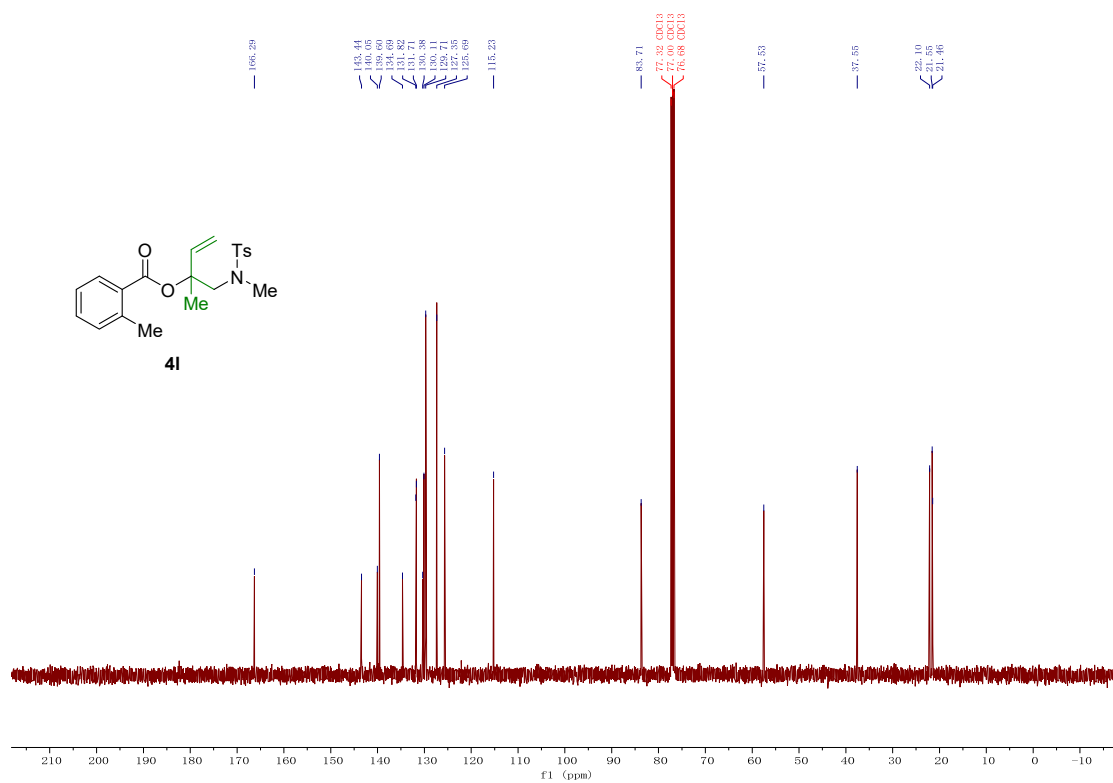

[illegible]

**4m**

CN(C)C(C=C)C(=O)c1ccccc1F

163.06  
163.03  
162.90  
160.33

143.42  
139.07  
138.28  
134.43  
134.33  
132.55  
129.69  
127.32  
127.32  
124.99  
124.55  
119.57  
117.47  
116.78  
115.55

84.69

77.36 CDCl<sub>3</sub>  
76.88 CDCl<sub>3</sub>  
76.88 CDCl<sub>3</sub>

57.78

37.29  
37.25

21.83  
21.44

f1 (ppm)

**$^{19}\text{F}$  NMR (377 MHz,  $\text{CDCl}_3$ )**

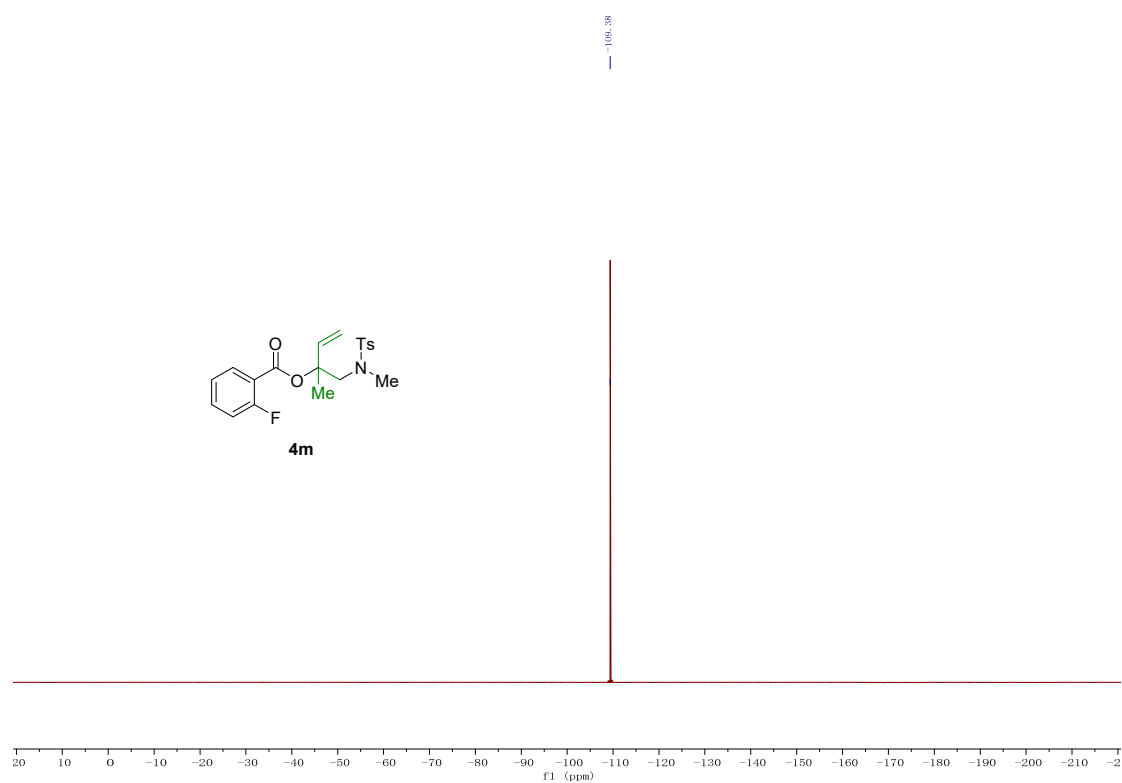

**4n**

CC(C=C)C(C)C(C)N(C)C1=CC=C(C=C1)C(=O)OC2=CC=CC=C2C(F)(F)F

Chemical structure of compound **4n** is shown. The structure features a 2-(trifluoromethyl)benzoate moiety linked to a 1-methyl-2-(trimethylsilyl)vinyl group.

**<sup>1</sup>H NMR spectrum (CDCl<sub>3</sub>):**

The spectrum displays several peaks corresponding to the protons in the molecule. Key peaks are observed in the aromatic region (7.4-7.7 ppm), the vinyl region (5.1-5.6 ppm), and the aliphatic region (1.3-2.8 ppm). Integration values are provided below the peaks.

**Peak Data:**

| Chemical Shift (ppm)                                                                                                                                                                                                                                                                                                                                                                                                                                                                                                                                                                                                                                                                                                                                                                                                                                                                                                                                                                                                                                                                                                                                                                                                                                                                                                                                                                                                                                                                                                                                                                                                                                                                                                                                                                                                                                                                                                                                                                                                                                                                                                                                                                                                                                                                                                                                                                                                                                                                                                                                                                                                                                                                                                                                                                                                                                                                                                                                                                                                                                                                                                                                                                                                                                                                                                                                                                                                                                                                                                                                                                                                                                                                                                                                                                                                                                                                                                                                                                      | Integration |
|-------------------------------------------------------------------------------------------------------------------------------------------------------------------------------------------------------------------------------------------------------------------------------------------------------------------------------------------------------------------------------------------------------------------------------------------------------------------------------------------------------------------------------------------------------------------------------------------------------------------------------------------------------------------------------------------------------------------------------------------------------------------------------------------------------------------------------------------------------------------------------------------------------------------------------------------------------------------------------------------------------------------------------------------------------------------------------------------------------------------------------------------------------------------------------------------------------------------------------------------------------------------------------------------------------------------------------------------------------------------------------------------------------------------------------------------------------------------------------------------------------------------------------------------------------------------------------------------------------------------------------------------------------------------------------------------------------------------------------------------------------------------------------------------------------------------------------------------------------------------------------------------------------------------------------------------------------------------------------------------------------------------------------------------------------------------------------------------------------------------------------------------------------------------------------------------------------------------------------------------------------------------------------------------------------------------------------------------------------------------------------------------------------------------------------------------------------------------------------------------------------------------------------------------------------------------------------------------------------------------------------------------------------------------------------------------------------------------------------------------------------------------------------------------------------------------------------------------------------------------------------------------------------------------------------------------------------------------------------------------------------------------------------------------------------------------------------------------------------------------------------------------------------------------------------------------------------------------------------------------------------------------------------------------------------------------------------------------------------------------------------------------------------------------------------------------------------------------------------------------------------------------------------------------------------------------------------------------------------------------------------------------------------------------------------------------------------------------------------------------------------------------------------------------------------------------------------------------------------------------------------------------------------------------------------------------------------------------------------------------|-------------|
| 7.74, 7.72, 7.70, 7.68, 7.65, 7.64, 7.60, 7.58, 7.57, 7.56, 7.55, 7.54, 7.53, 7.52, 7.51, 7.50, 7.49, 7.48, 7.47, 7.46, 7.45, 7.44, 7.43, 7.42, 7.41, 7.40, 7.39, 7.38, 7.37, 7.36, 7.35, 7.34, 7.33, 7.32, 7.31, 7.30, 7.29, 7.28, 7.27, 7.26, 7.25, 7.24, 7.23, 7.22, 7.21, 7.20, 7.19, 7.18, 7.17, 7.16, 7.15, 7.14, 7.13, 7.12, 7.11, 7.10, 7.09, 7.08, 7.07, 7.06, 7.05, 7.04, 7.03, 7.02, 7.01, 7.00, 6.99, 6.98, 6.97, 6.96, 6.95, 6.94, 6.93, 6.92, 6.91, 6.90, 6.89, 6.88, 6.87, 6.86, 6.85, 6.84, 6.83, 6.82, 6.81, 6.80, 6.79, 6.78, 6.77, 6.76, 6.75, 6.74, 6.73, 6.72, 6.71, 6.70, 6.69, 6.68, 6.67, 6.66, 6.65, 6.64, 6.63, 6.62, 6.61, 6.60, 6.59, 6.58, 6.57, 6.56, 6.55, 6.54, 6.53, 6.52, 6.51, 6.50, 6.49, 6.48, 6.47, 6.46, 6.45, 6.44, 6.43, 6.42, 6.41, 6.40, 6.39, 6.38, 6.37, 6.36, 6.35, 6.34, 6.33, 6.32, 6.31, 6.30, 6.29, 6.28, 6.27, 6.26, 6.25, 6.24, 6.23, 6.22, 6.21, 6.20, 6.19, 6.18, 6.17, 6.16, 6.15, 6.14, 6.13, 6.12, 6.11, 6.10, 6.09, 6.08, 6.07, 6.06, 6.05, 6.04, 6.03, 6.02, 6.01, 6.00, 5.99, 5.98, 5.97, 5.96, 5.95, 5.94, 5.93, 5.92, 5.91, 5.90, 5.89, 5.88, 5.87, 5.86, 5.85, 5.84, 5.83, 5.82, 5.81, 5.80, 5.79, 5.78, 5.77, 5.76, 5.75, 5.74, 5.73, 5.72, 5.71, 5.70, 5.69, 5.68, 5.67, 5.66, 5.65, 5.64, 5.63, 5.62, 5.61, 5.60, 5.59, 5.58, 5.57, 5.56, 5.55, 5.54, 5.53, 5.52, 5.51, 5.50, 5.49, 5.48, 5.47, 5.46, 5.45, 5.44, 5.43, 5.42, 5.41, 5.40, 5.39, 5.38, 5.37, 5.36, 5.35, 5.34, 5.33, 5.32, 5.31, 5.30, 5.29, 5.28, 5.27, 5.26, 5.25, 5.24, 5.23, 5.22, 5.21, 5.20, 5.19, 5.18, 5.17, 5.16, 5.15, 5.14, 5.13, 5.12, 5.11, 5.10, 5.09, 5.08, 5.07, 5.06, 5.05, 5.04, 5.03, 5.02, 5.01, 5.00, 4.99, 4.98, 4.97, 4.96, 4.95, 4.94, 4.93, 4.92, 4.91, 4.90, 4.89, 4.88, 4.87, 4.86, 4.85, 4.84, 4.83, 4.82, 4.81, 4.80, 4.79, 4.78, 4.77, 4.76, 4.75, 4.74, 4.73, 4.72, 4.71, 4.70, 4.69, 4.68, 4.67, 4.66, 4.65, 4.64, 4.63, 4.62, 4.61, 4.60, 4.59, 4.58, 4.57, 4.56, 4.55, 4.54, 4.53, 4.52, 4.51, 4.50, 4.49, 4.48, 4.47, 4.46, 4.45, 4.44, 4.43, 4.42, 4.41, 4.40, 4.39, 4.38, 4.37, 4.36, 4.35, 4.34, 4.33, 4.32, 4.31, 4.30, 4.29, 4.28, 4.27, 4.26, 4.25, 4.24, 4.23, 4.22, 4.21, 4.20, 4.19, 4.18, 4.17, 4.16, 4.15, 4.14, 4.13, 4.12, 4.11, 4.10, 4.09, 4.08, 4.07, 4.06, 4.05, 4.04, 4.03, 4.02, 4.01, 4.00, 3.99, 3.98, 3.97, 3.96, 3.95, 3.94, 3.93, 3.92, 3.91, 3.90, 3.89, 3.88, 3.87, 3.86, 3.85, 3.84, 3.83, 3.82, 3.81, 3.80, 3.79, 3.78, 3.77, 3.76, 3.75, 3.74, 3.73, 3.72, 3.71, 3.70, 3.69, 3.68, 3.67, 3.66, 3.65, 3.64, 3.63, 3.62, 3.61, 3.60, 3.59, 3.58, 3.57, 3.56, 3.55, 3.54, 3.53, 3.52, 3.51, 3.50, 3.49, 3.48, 3.47, 3.46, 3.45, 3.44, 3.43, 3.42, 3.41, 3.40, 3.39, 3.38, 3.37, 3.36, 3.35, 3.34, 3.33, 3.32, 3.31, 3.30, 3.29, 3.28, 3.27, 3.26, 3.25, 3.24, 3.23, 3.22, 3.21, 3.20, 3.19, 3.18, 3.17, 3.16, 3.15, 3.14, 3.13, 3.12, 3.11, 3.10, 3.09, 3.08, 3.07, 3.06, 3.05, 3.04, 3.03, 3.02, 3.01, 3.00, 2.99, 2.98, 2.97, 2.96, 2.95, 2.94, 2.93, 2.92, 2.91, 2.90, 2.89, 2.88, 2.87, 2.86, 2.85, 2.84, 2.83, 2.82, 2.81, 2.80, 2.79, 2.78, 2.77, 2.76, 2.75, 2.74, 2.73, 2.72, 2.71, 2.70, 2.69, 2.68, 2.67, 2.66, 2.65, 2.64, 2.63, 2.62, 2.61, 2.60, 2.59, 2.58, 2.57, 2.56, 2.55, 2.54, 2.53, 2.52, 2.51, 2.50, 2.49, 2.48, 2.47, 2.46, 2.45, 2.44, 2.43, 2.42, 2.41, 2.40, 2.39, 2.38, 2.37, 2.36, 2.35, 2.34, 2.33, 2.32, 2.31, 2.30, 2.29, 2.28, 2.27, 2.26, 2.25, 2.24, 2.23, 2.22, 2.21, 2.20, 2.19, 2.18, 2.17, 2.16, 2.15, 2.14, 2.13, 2.12, 2.11, 2.10, 2.09, 2.08, 2.07, 2.06, 2.05, 2.04, 2.03, 2.02, 2.01, 2.00, 1.99, 1.98, 1.97, 1.96, 1.95, 1.94, 1.93, 1.92, 1.91, 1.90, 1.89, 1.88, 1.87, 1.86, 1.85, 1.84, 1.83, 1.82, 1.81, 1.80, 1.79, 1.78, 1.77, 1.76, 1.75, 1.74, 1.73, 1.72, 1.71, 1.70, 1.69, 1.68, 1.67, 1.66, 1.65, 1.64, 1.63, 1.62, 1.61, 1.60, 1.59, 1.58, 1.57, 1.56, 1.55, 1.54, 1.53, 1.52, 1.51, 1.50, 1.49, 1.48, 1.47, 1.46, 1.45, 1.44, 1.43, 1.42, 1.41, 1.40, 1.39, 1.38, 1.37, 1.36, 1.35, 1.34, 1.33, 1.32, 1.31, 1.30, 1.29, 1.28, 1.27, |             |

Chemical structure of **4n** is shown above the spectrum. The structure is a 2-(trifluoromethyl)benzoic acid derivative, specifically a 2-(trifluoromethyl)benzoic acid derivative, with a trifluoromethyl group (CF<sub>3</sub>) and a carboxylic acid group (COOH) on the benzene ring. The structure is labeled **4n**.

The <sup>13</sup>C NMR spectrum (CDCl<sub>3</sub>) shows the following chemical shifts (ppm):

- 165.32
- 145.50
- 138.48
- 134.54
- 132.13
- 131.43
- 130.87
- 129.89
- 129.87
- 129.27
- 127.95
- 127.95
- 126.58
- 126.53
- 126.48
- 124.73
- 122.61
- 116.68
- 85.32
- 77.32 CDCl<sub>3</sub>
- 77.06 CDCl<sub>3</sub>
- 76.68 CDCl<sub>3</sub>
- 57.68
- 37.65
- 21.43
- 21.12

The spectrum displays a series of peaks corresponding to these chemical shifts, with the solvent peaks (CDCl<sub>3</sub>) centered around 77 ppm.

**$^{19}\text{F}$  NMR (377 MHz,  $\text{CDCl}_3$ )**

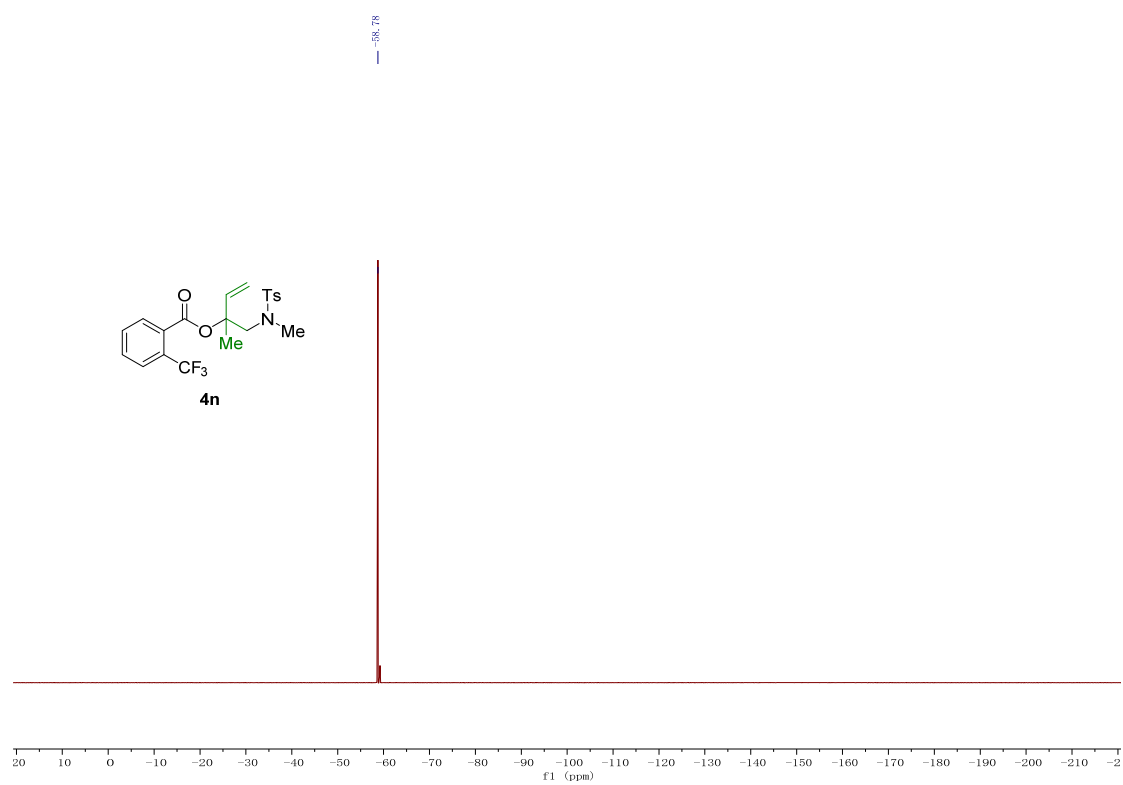

**<sup>1</sup>H NMR (400 MHz, CDCl<sub>3</sub>)**

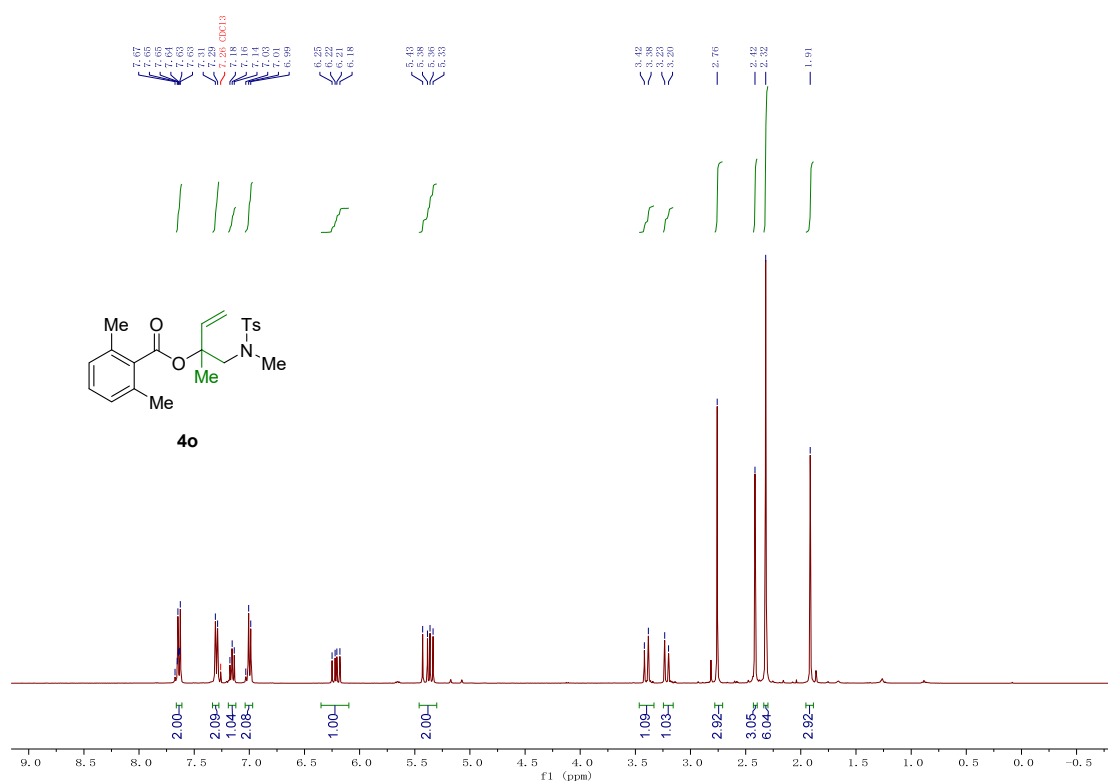

**<sup>13</sup>C NMR (101 MHz, CDCl<sub>3</sub>)**

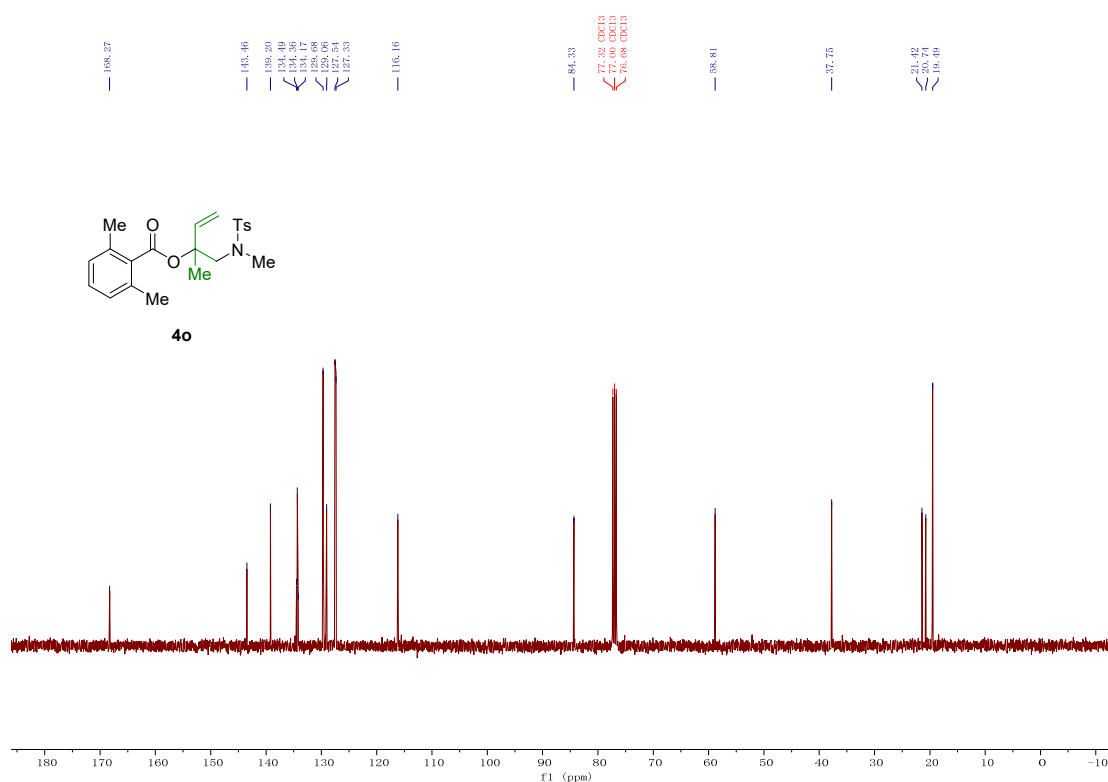

Chemical structure of **5a** is shown above the spectrum.

<sup>1</sup>H NMR spectrum (CDCl<sub>3</sub>) of **5a** is displayed below the structure. The x-axis represents the chemical shift in ppm (f1), ranging from -0.5 to 9.0. The spectrum shows several peaks, with integration values indicated below the baseline.

Integration values (from left to right): 2.08, 4.24, 3.00, 1.00, 2.03, 1.04, 1.04, 2.08, 3.06, 2.02, 3.15, 3.00.

Chemical shifts (δ) listed on the right side of the spectrum (from top to bottom): 7.64, 7.64, 7.62, 7.52, 7.50, 7.49, 7.28, 7.27, 7.26, 7.25, 7.25, 7.24, 7.20, 7.19, 7.18, 7.17, 6.01, 5.98, 5.84, 5.71, 5.17, 3.38, 3.35, 3.15, 3.15, 2.93, 2.89, 2.89, 2.72, 2.69, 2.59, 2.57, 2.43, 1.65.

**5a**

<sup>13</sup>C NMR spectrum (CDCl<sub>3</sub>) of compound **5a**. The spectrum shows peaks corresponding to the chemical structure, with the following chemical shifts (ppm) labeled:

- 171.41
- 143.39
- 142.77
- 139.20
- 134.65
- 128.67
- 128.41
- 128.26
- 127.30
- 126.25
- 115.17
- 83.25
- 77.39 CDCl<sub>3</sub>
- 77.00 CDCl<sub>3</sub>
- 76.68 CDCl<sub>3</sub>
- 57.64
- 37.44
- 36.77
- 30.77
- 21.52
- 21.43

**<sup>1</sup>H NMR (400 MHz, CDCl<sub>3</sub>)**

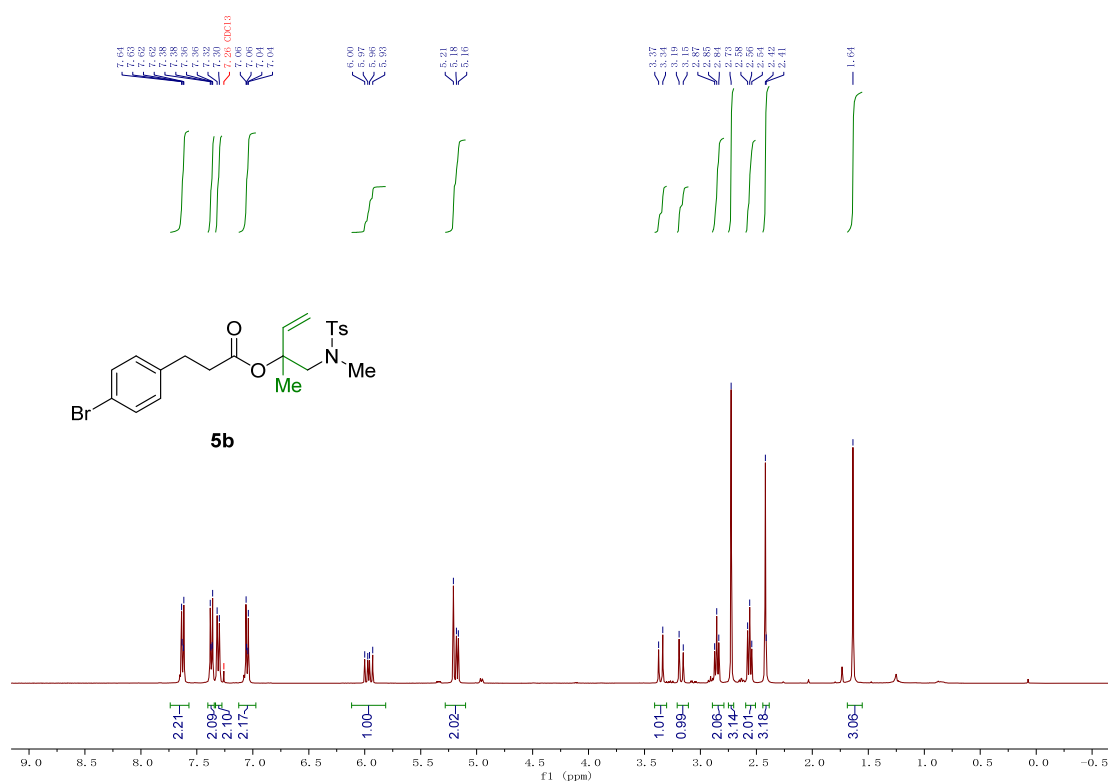

**<sup>13</sup>C NMR (101 MHz, CDCl<sub>3</sub>)**

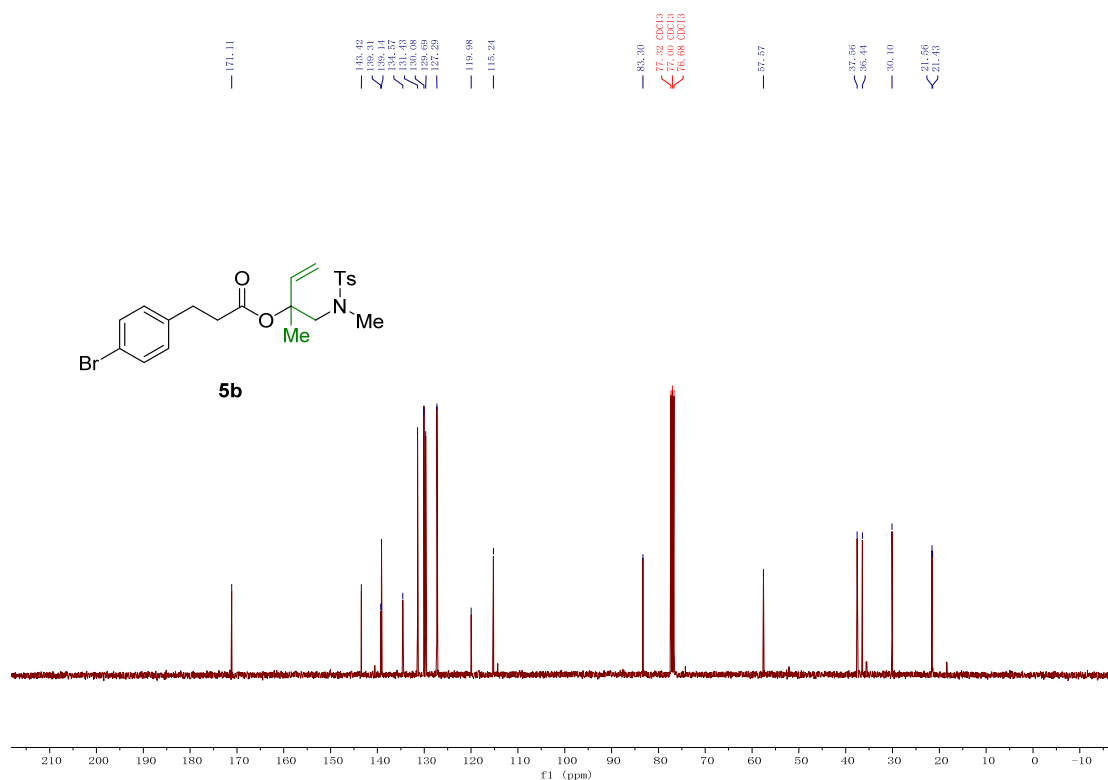

**<sup>1</sup>H NMR (400 MHz, CDCl<sub>3</sub>)**

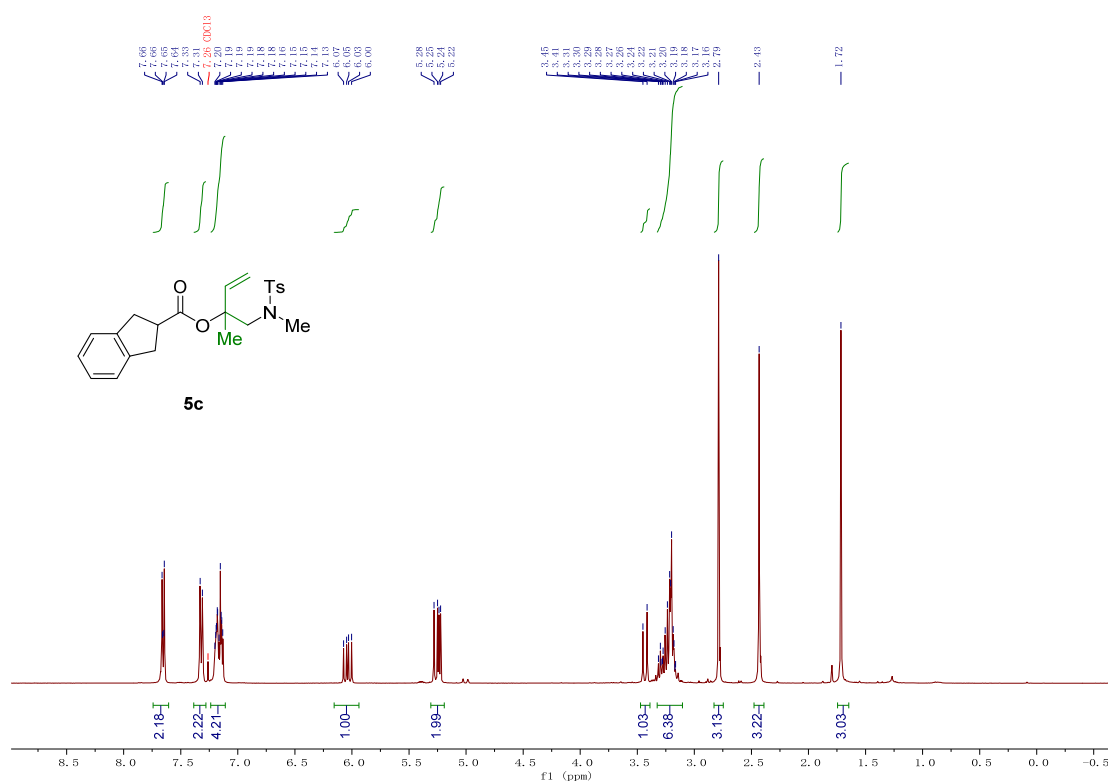

**<sup>13</sup>C NMR (101 MHz, CDCl<sub>3</sub>)**

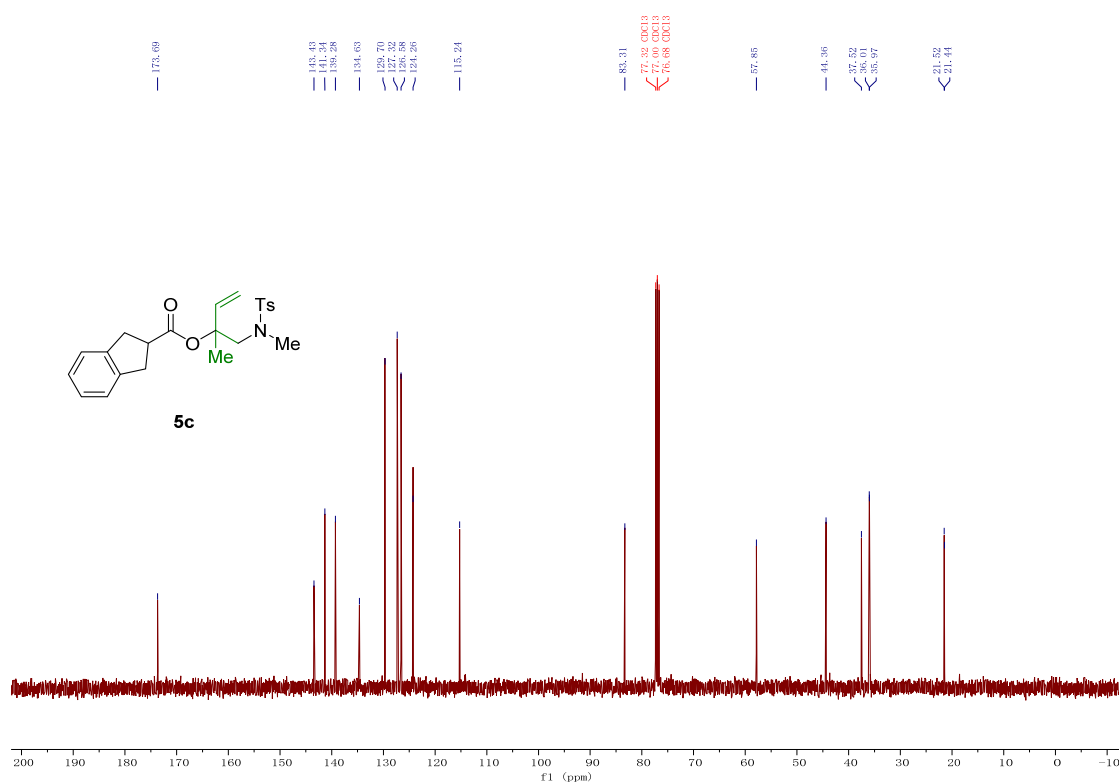

**<sup>1</sup>H NMR (400 MHz, CDCl<sub>3</sub>)**

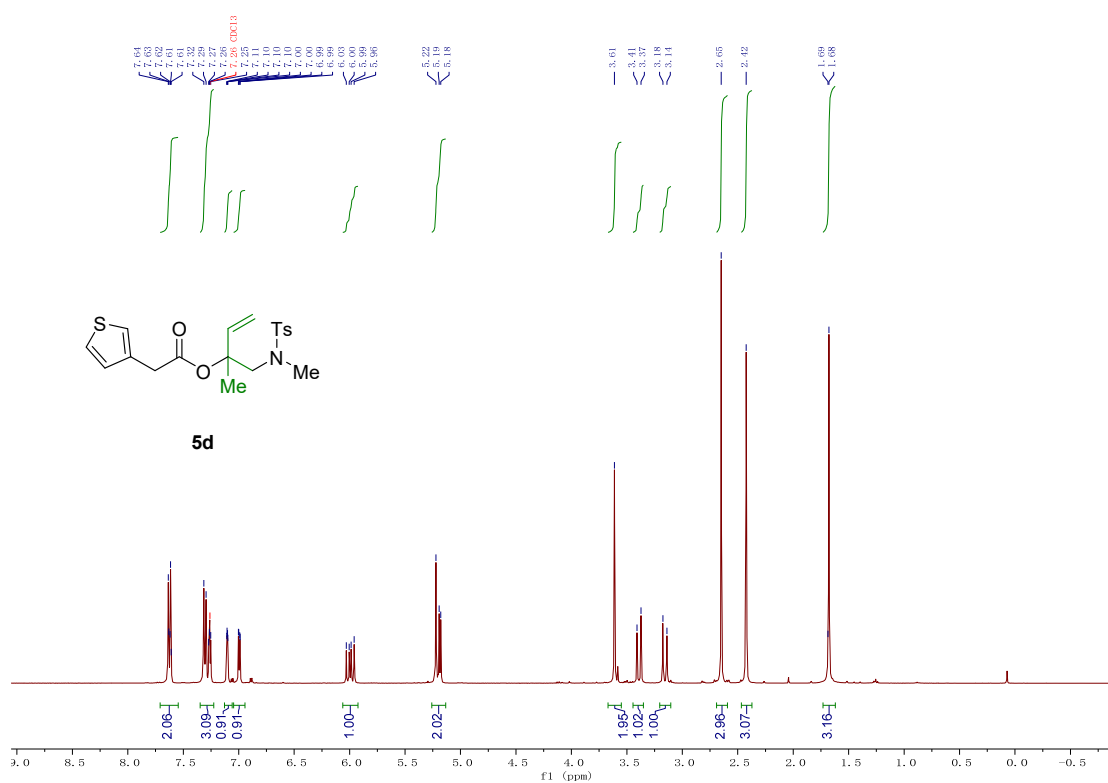

**<sup>13</sup>C NMR (101 MHz, CDCl<sub>3</sub>)**

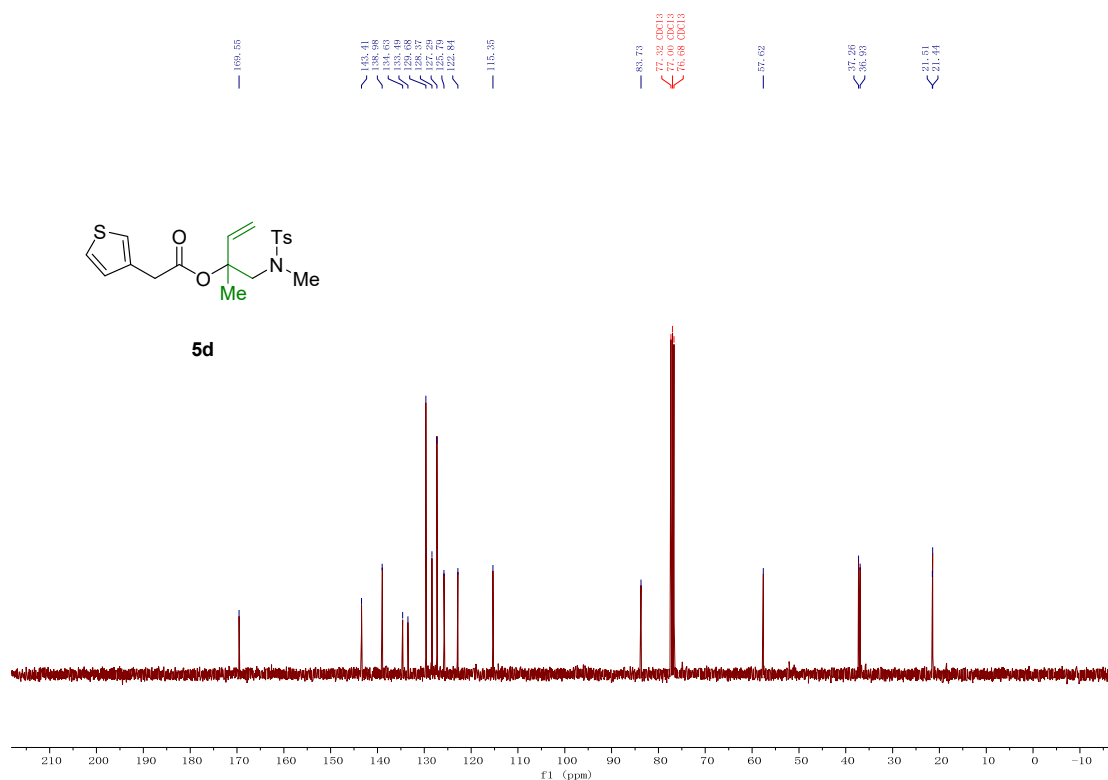

**<sup>1</sup>H NMR (400 MHz, CDCl<sub>3</sub>)**

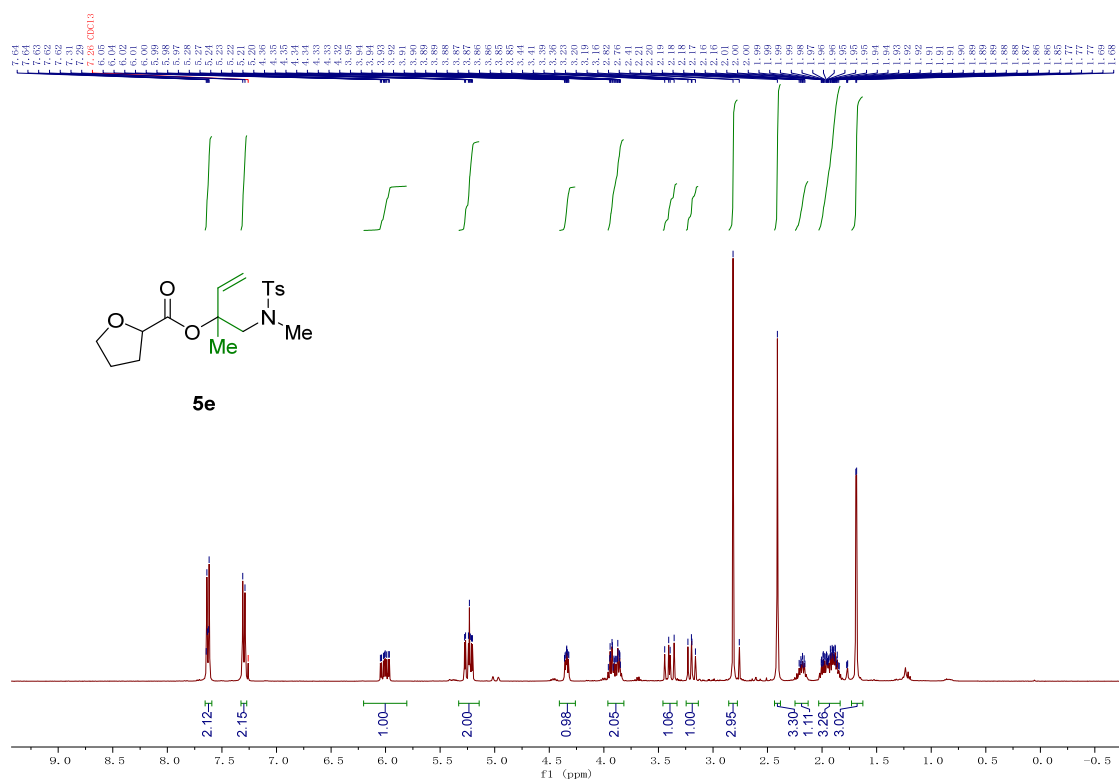

**<sup>13</sup>C NMR (101 MHz, CDCl<sub>3</sub>)**

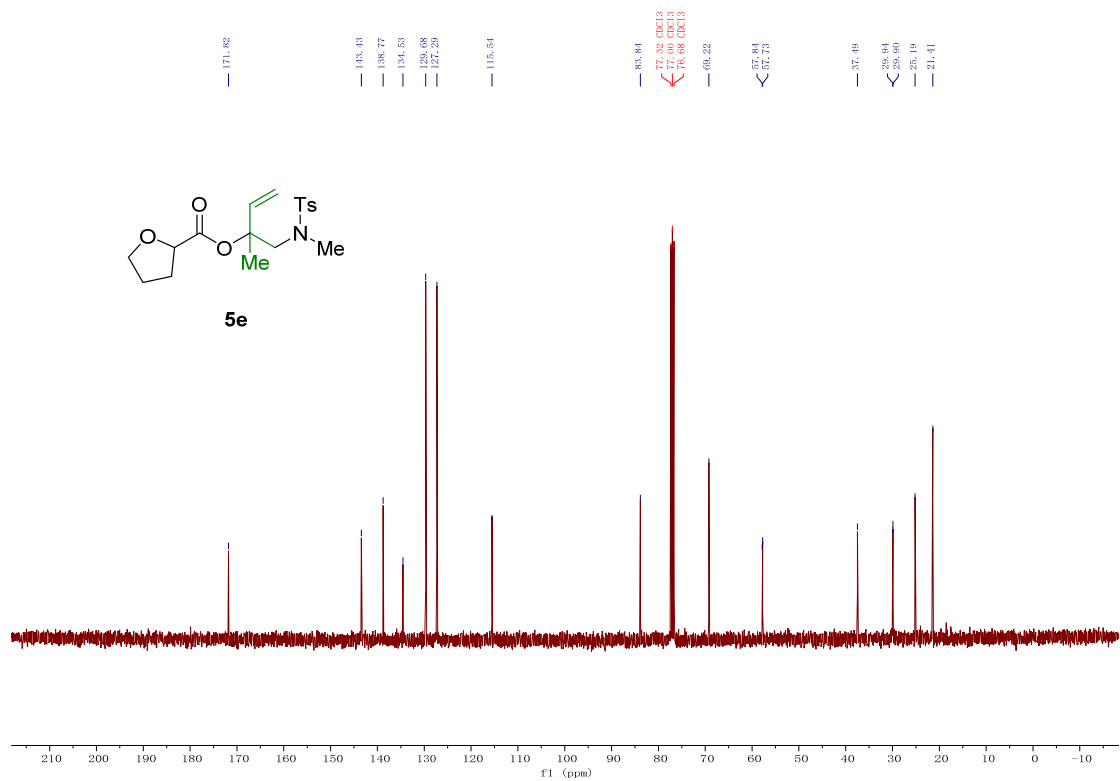

Chemical structure of **5f** is shown. The spectrum displays peaks corresponding to the structure, with integration values provided below the baseline. The x-axis is labeled f1 (ppm) and ranges from -0.5 to 9.0. The y-axis represents intensity.

Integration values (from left to right): 2.13, 7.17, 1.00, 2.00, 2.13, 2.14, 1.03, 0.99, 2.13, 2.09, 4.23, 2.14, 3.08, 1.99.

Chemical shifts (delta) listed on the right (from top to bottom): 7.65, 7.63, 7.63, 7.54, 7.54, 7.53, 7.53, 7.52, 7.52, 7.51, 7.50, 7.29, 7.29, 7.29, 6.90, 6.90, 6.90, 6.25, 6.23, 6.23, 6.20, 6.20, 6.12, 6.11, 4.12, 4.11, 4.10, 4.07, 3.89, 3.89, 3.24, 3.24, 2.92, 2.86, 2.86, 2.79, 2.79, 2.45, 2.44, 2.44, 2.40, 2.39, 2.38, 1.89, 1.86, 1.64, 1.62, 1.61, 1.59, 1.58, 1.56.

Chemical structure of **5f** is shown above the spectrum.

<sup>13</sup>C NMR spectrum (CDCl<sub>3</sub>) peaks (ppm):

- 172.81
- 155.04
- 143.44
- 139.20
- 138.05
- 134.49
- 129.67
- 128.85
- 127.89
- 127.77
- 127.27
- 115.22
- 83.14
- 77.36 (CDCl<sub>3</sub>)
- 76.88 (CDCl<sub>3</sub>)
- 67.01
- 57.55
- 43.12
- 41.66
- 37.74
- 27.76
- 21.64
- 21.40

**$^1\text{H}$  NMR (400 MHz,  $\text{CDCl}_3$ )**

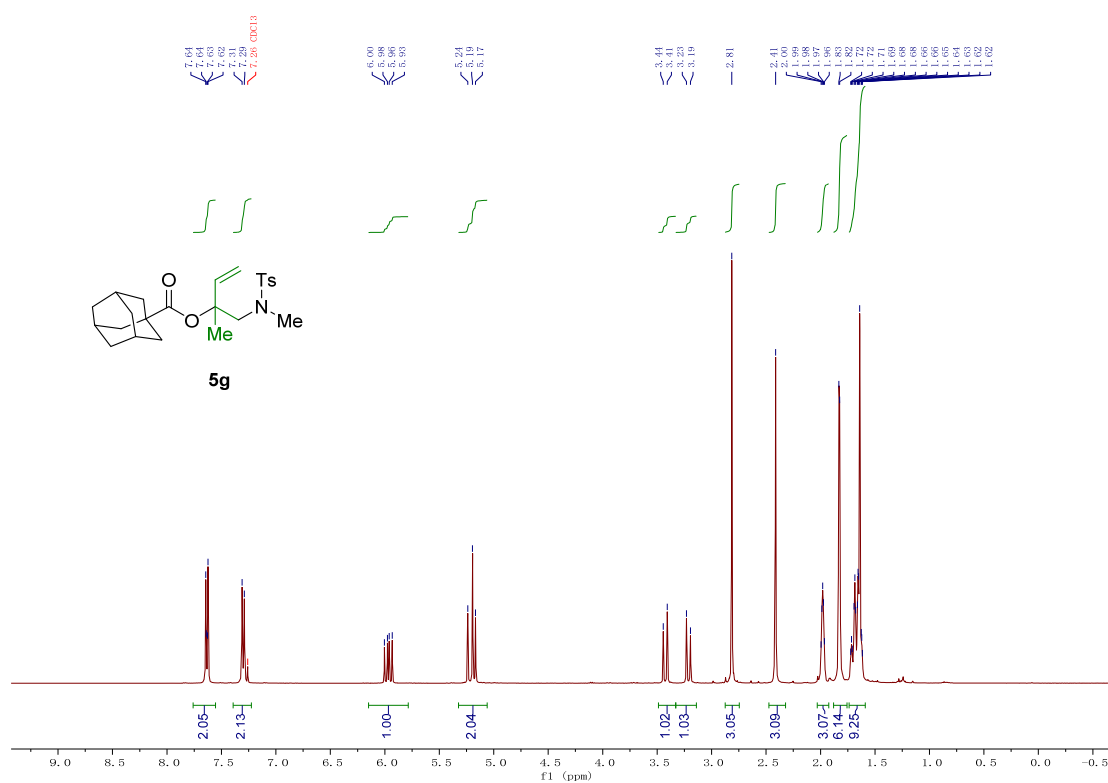

**$^{13}\text{C}$  NMR (101 MHz,  $\text{CDCl}_3$ )**

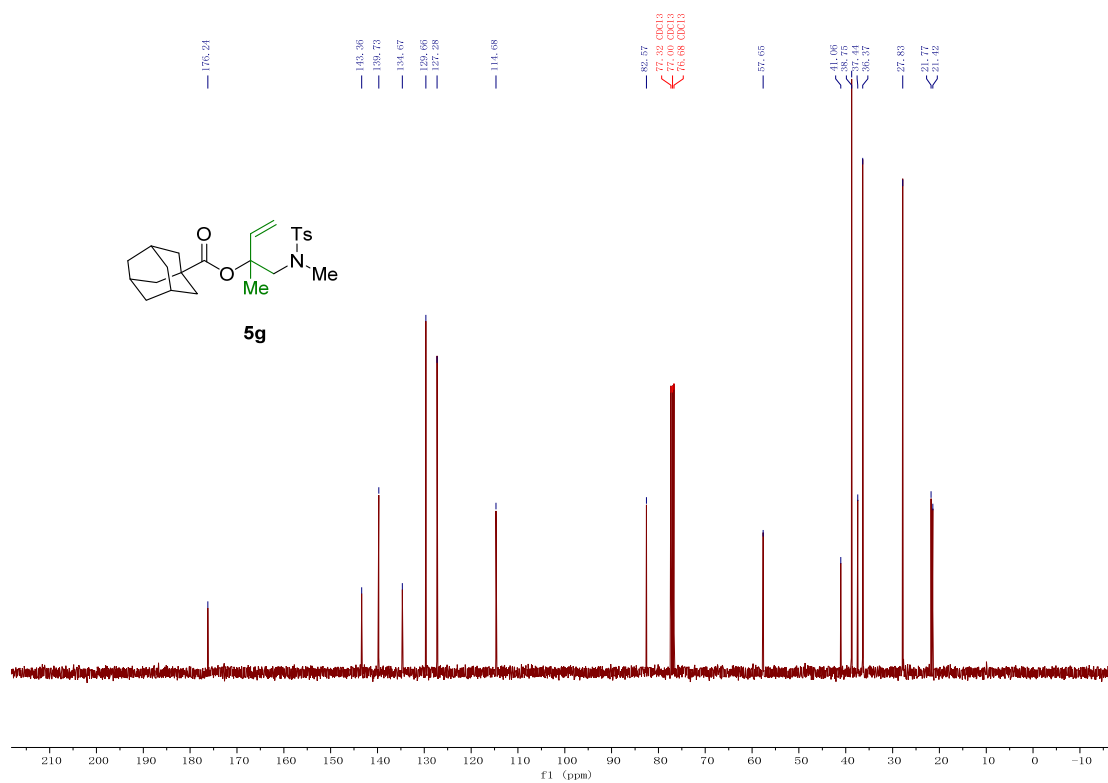

**<sup>1</sup>H NMR (400 MHz, CDCl<sub>3</sub>)**

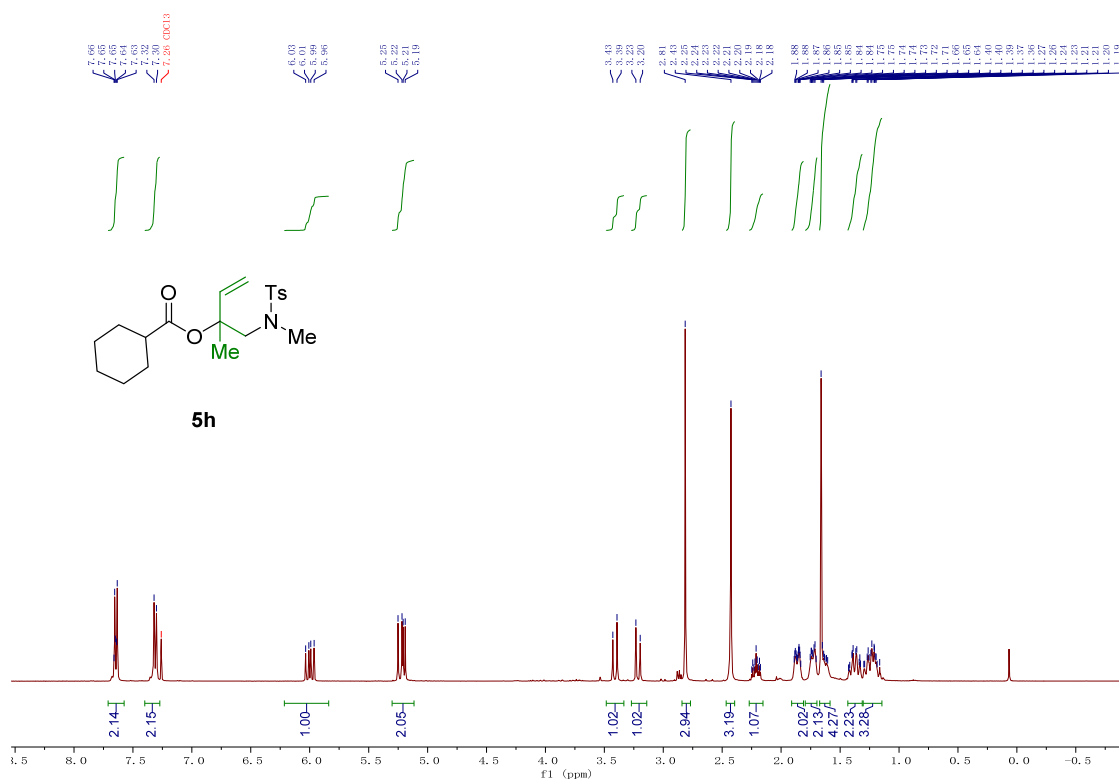

**<sup>13</sup>C NMR (101 MHz, CDCl<sub>3</sub>)**

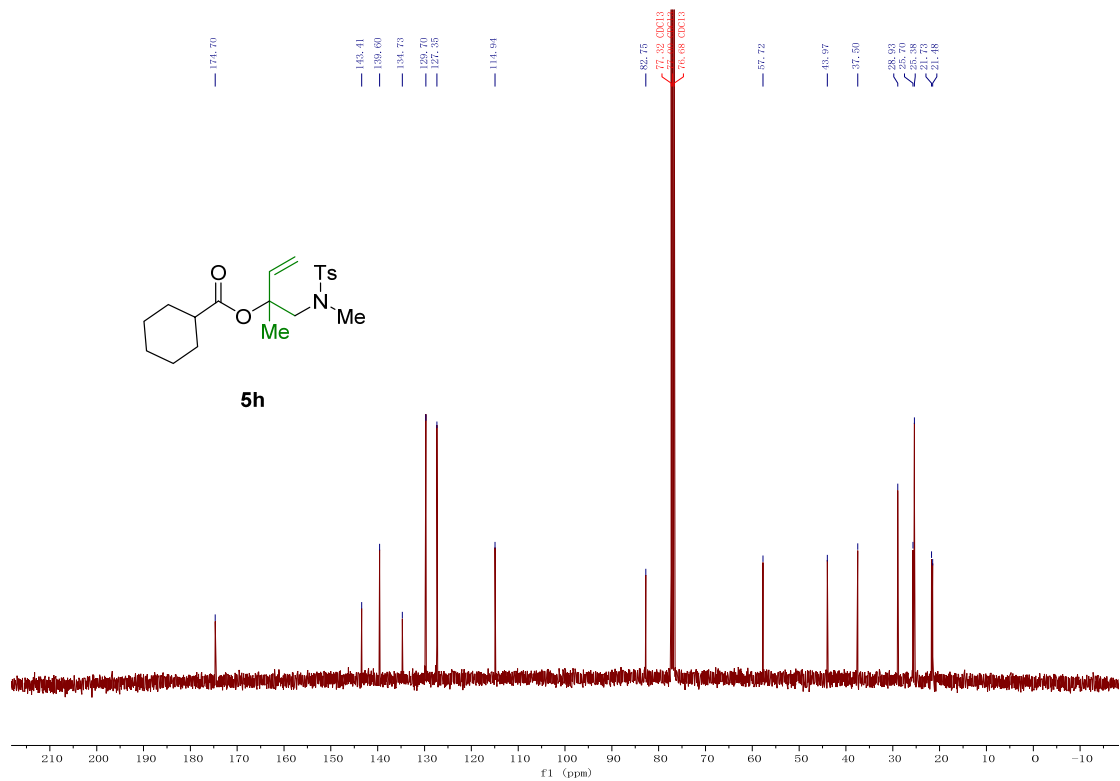

**5i**

CC(C)(C)C(=O)OC(C=C)CN(C)C1=CC=C(C=C1)S(=O)(=O)C

<sup>1</sup>H NMR spectrum (CDCl<sub>3</sub>) of compound **5i**. The x-axis represents the chemical shift in ppm (f1), ranging from -0.5 to 9.0. The spectrum shows several peaks corresponding to the protons in the molecule. Integration values are provided below the peaks, and chemical shift values (δ) are listed above the spectrum.

Chemical shift values (δ) in ppm:

- 7.66, 7.65, 7.64, 7.32, 7.30, 7.29
- 5.09, 5.08, 5.05
- 3.29, 3.28, 3.27, 3.21, 3.19
- 2.82
- 2.42
- 1.66
- 1.00

Integration values:

- 2.10, 2.11, 1.00, 2.08, 1.02, 1.02, 3.03, 3.20, 3.01, 9.11

**5i**

<sup>13</sup>C NMR spectrum (CDCl<sub>3</sub>) of compound **5i**. The spectrum shows peaks corresponding to the chemical structure, with the following chemical shifts (ppm) labeled:

- 177.05
- 143.42
- 139.64
- 134.70
- 129.70
- 127.53
- 114.83
- 82.79
- 77.32 (CDCl<sub>3</sub>)
- 77.05 (CDCl<sub>3</sub>)
- 76.98 (CDCl<sub>3</sub>)
- 57.88
- 39.15
- 37.45
- 27.08
- 21.55
- 21.46

**<sup>1</sup>H NMR (400 MHz, CDCl<sub>3</sub>)**

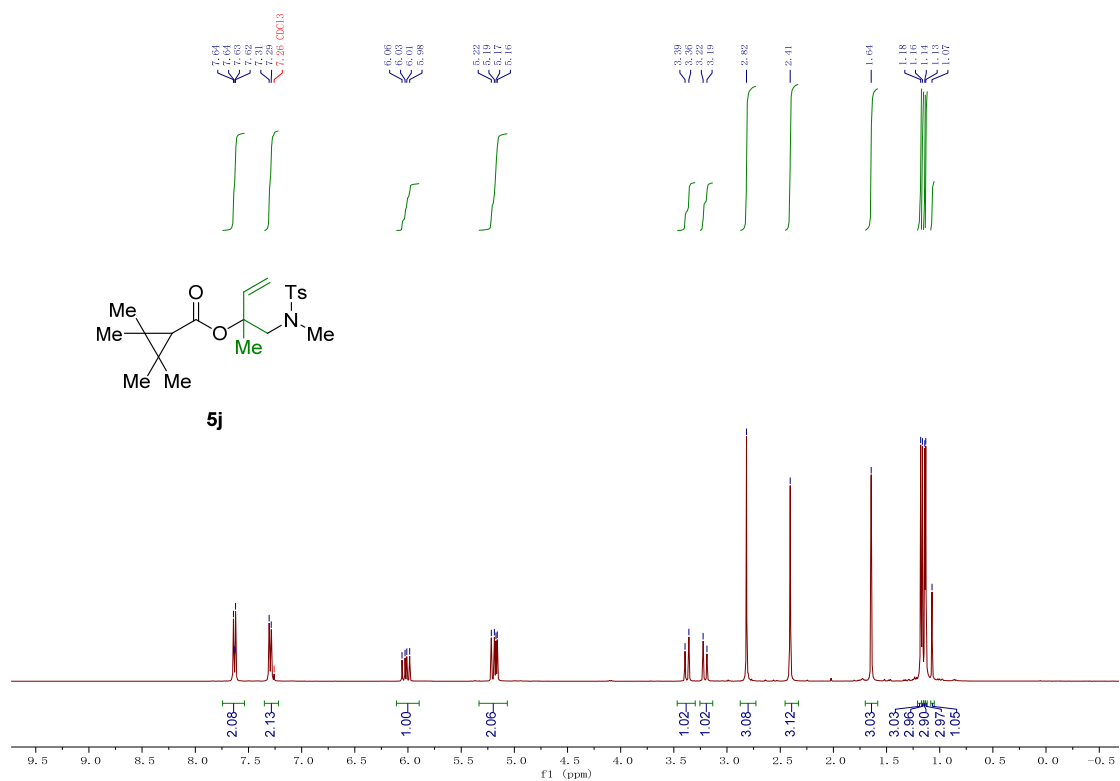

**<sup>13</sup>C NMR (101 MHz, CDCl<sub>3</sub>)**

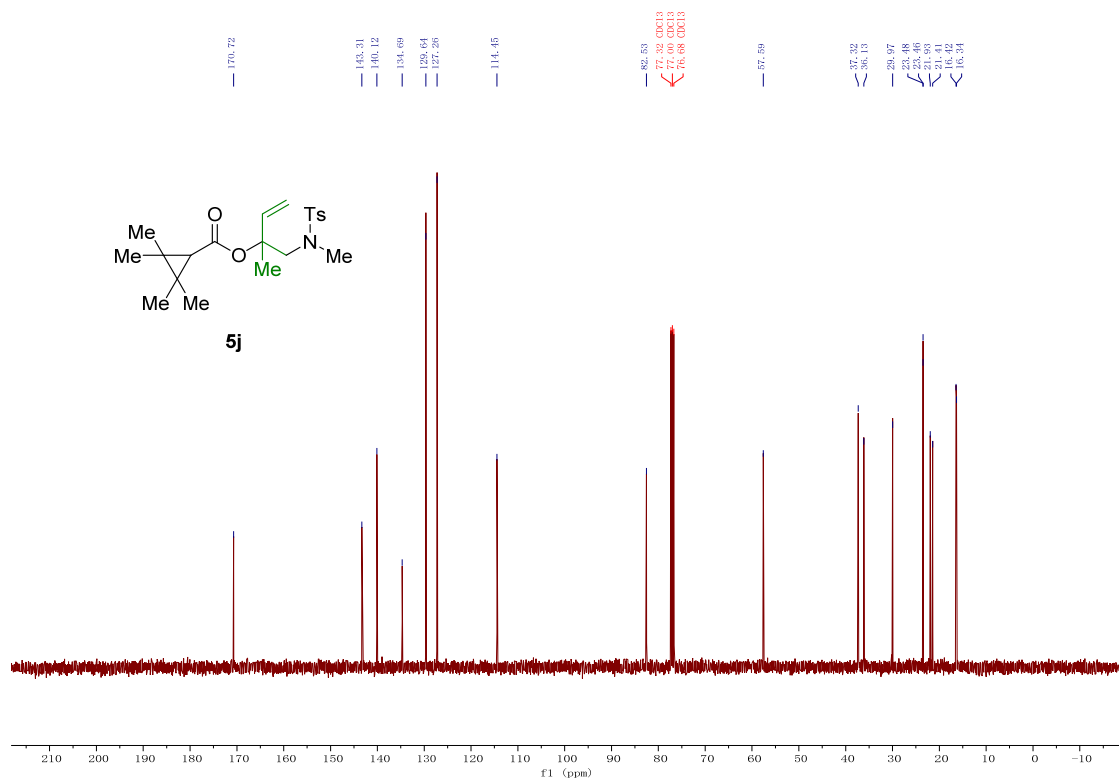

**<sup>1</sup>H NMR (400 MHz, CDCl<sub>3</sub>)**

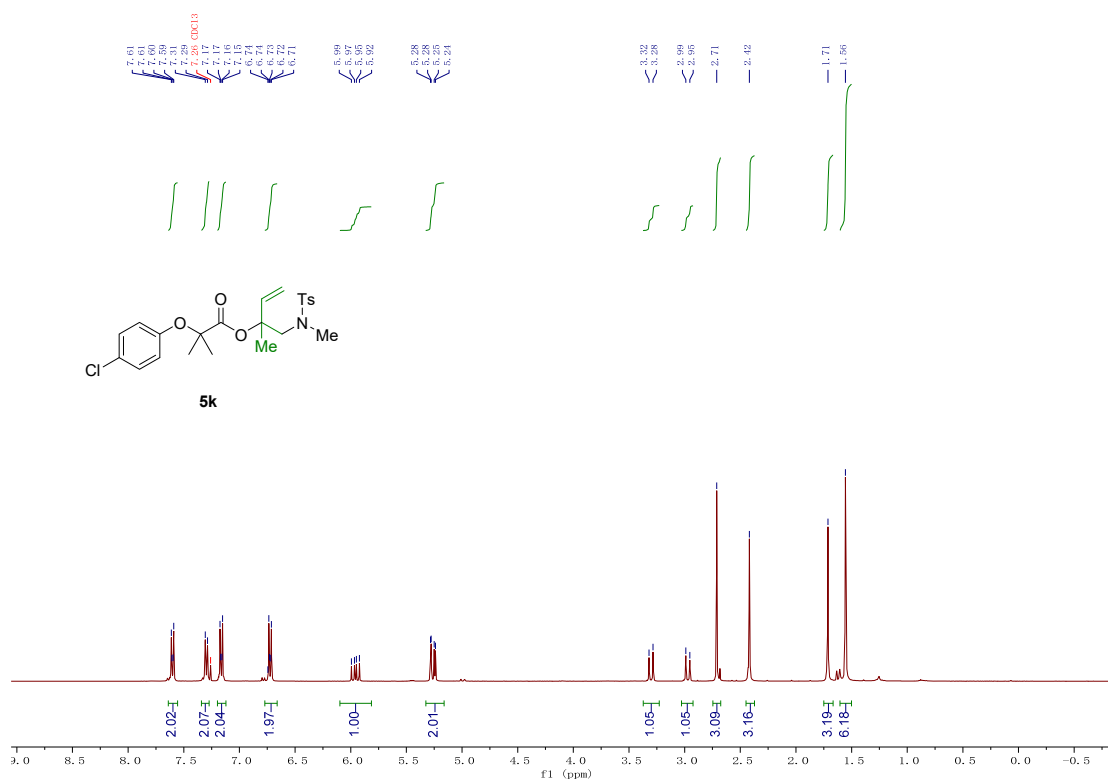

**<sup>13</sup>C NMR (101 MHz, CDCl<sub>3</sub>)**

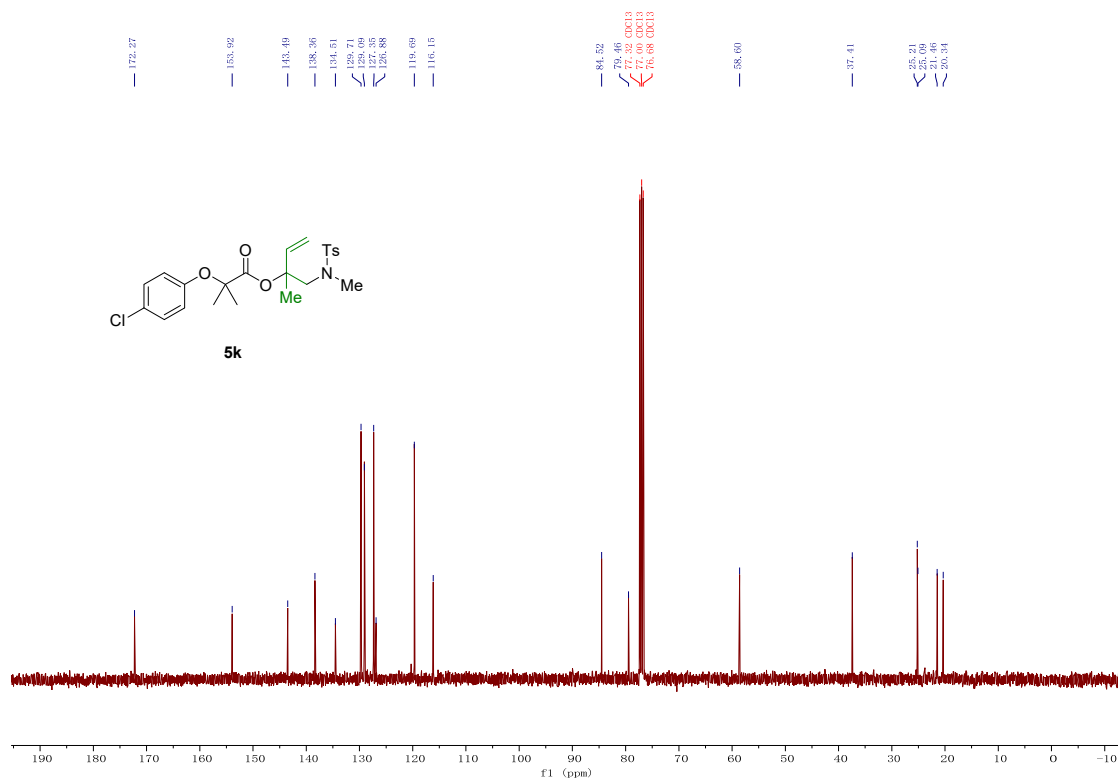

**<sup>1</sup>H NMR (400 MHz, CDCl<sub>3</sub>)**

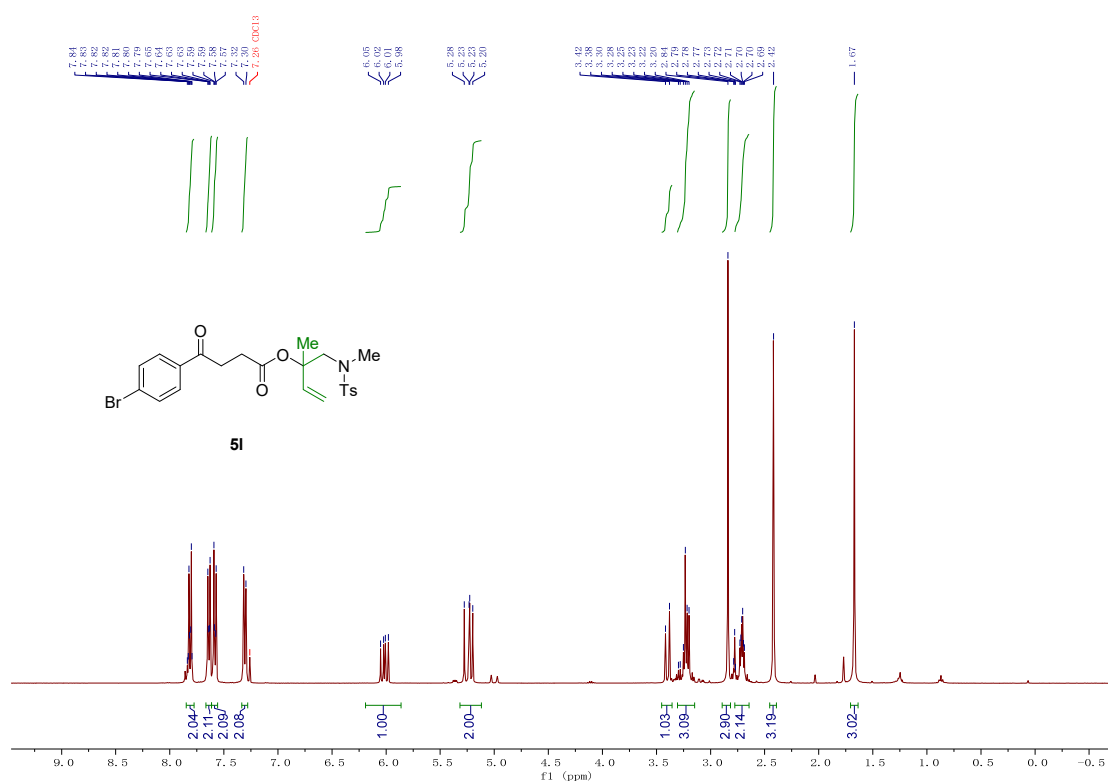

**<sup>13</sup>C NMR (101 MHz, CDCl<sub>3</sub>)**

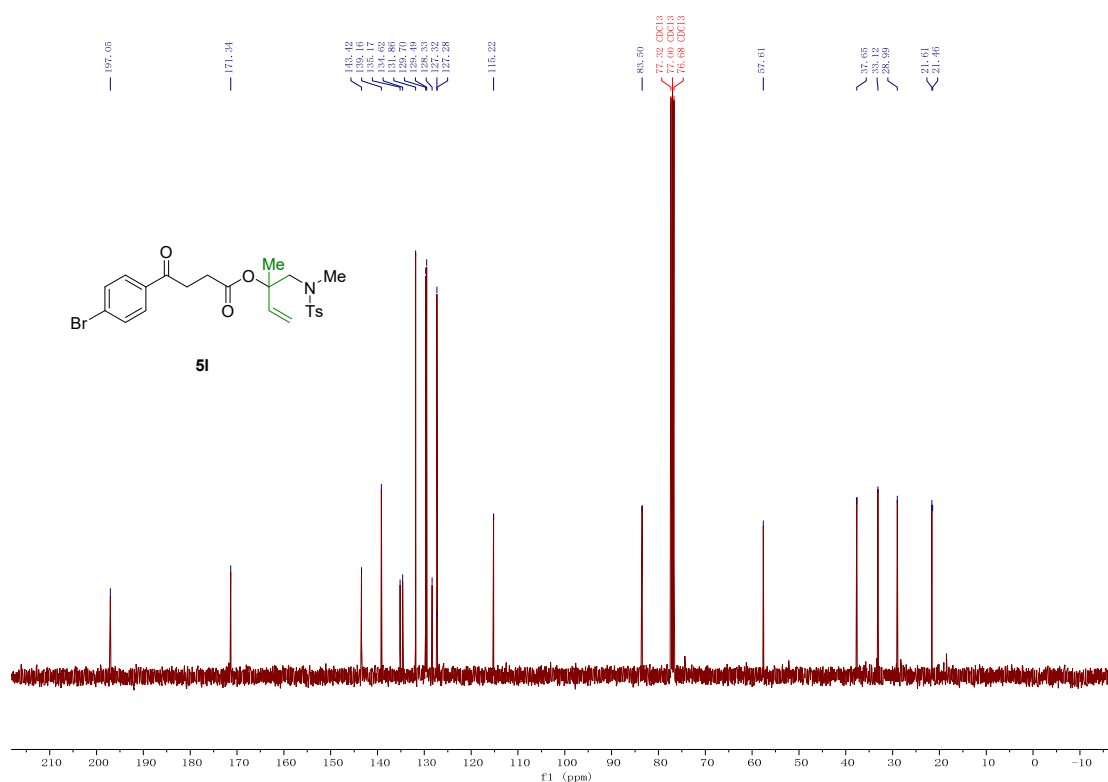

**<sup>1</sup>H NMR (400 MHz, CDCl<sub>3</sub>)**

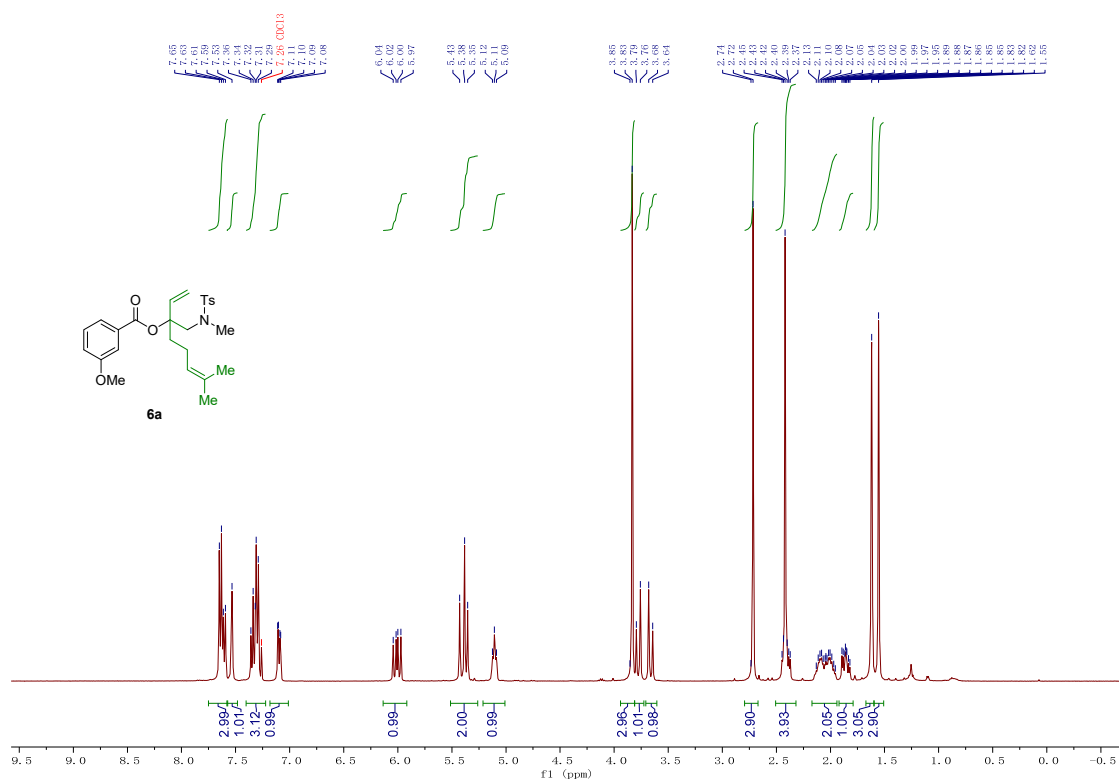

**<sup>13</sup>C NMR (101 MHz, CDCl<sub>3</sub>)**

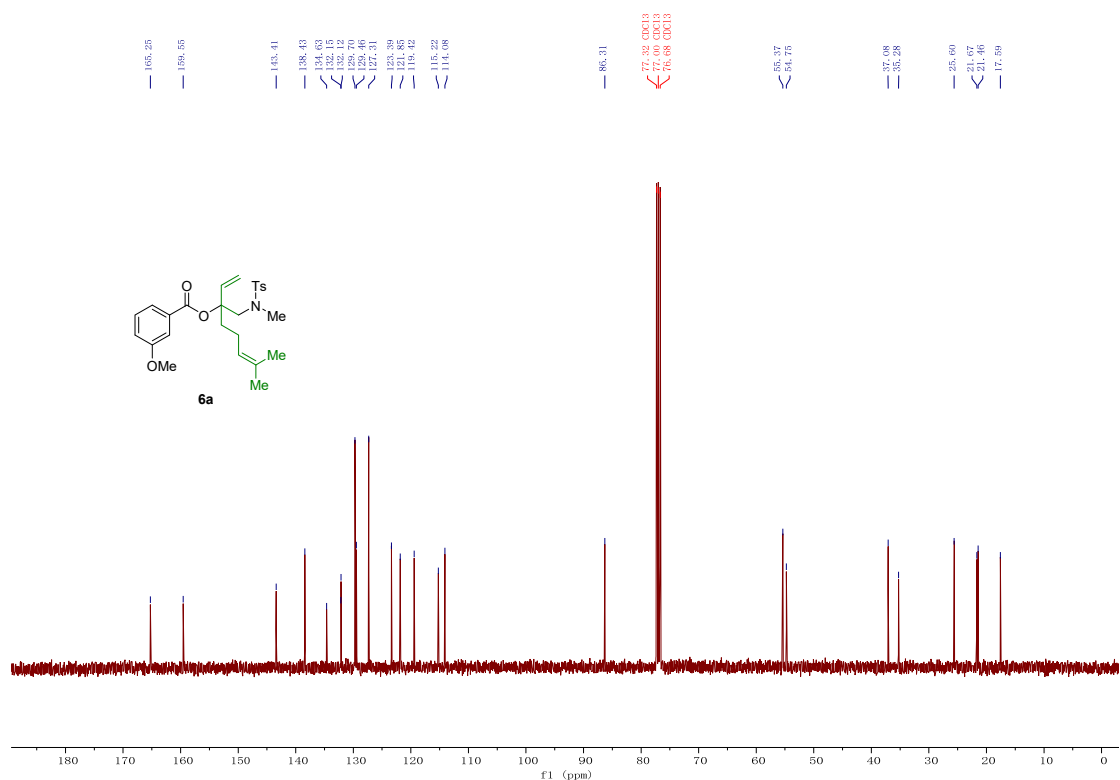

**<sup>1</sup>H NMR (400 MHz, CDCl<sub>3</sub>)**

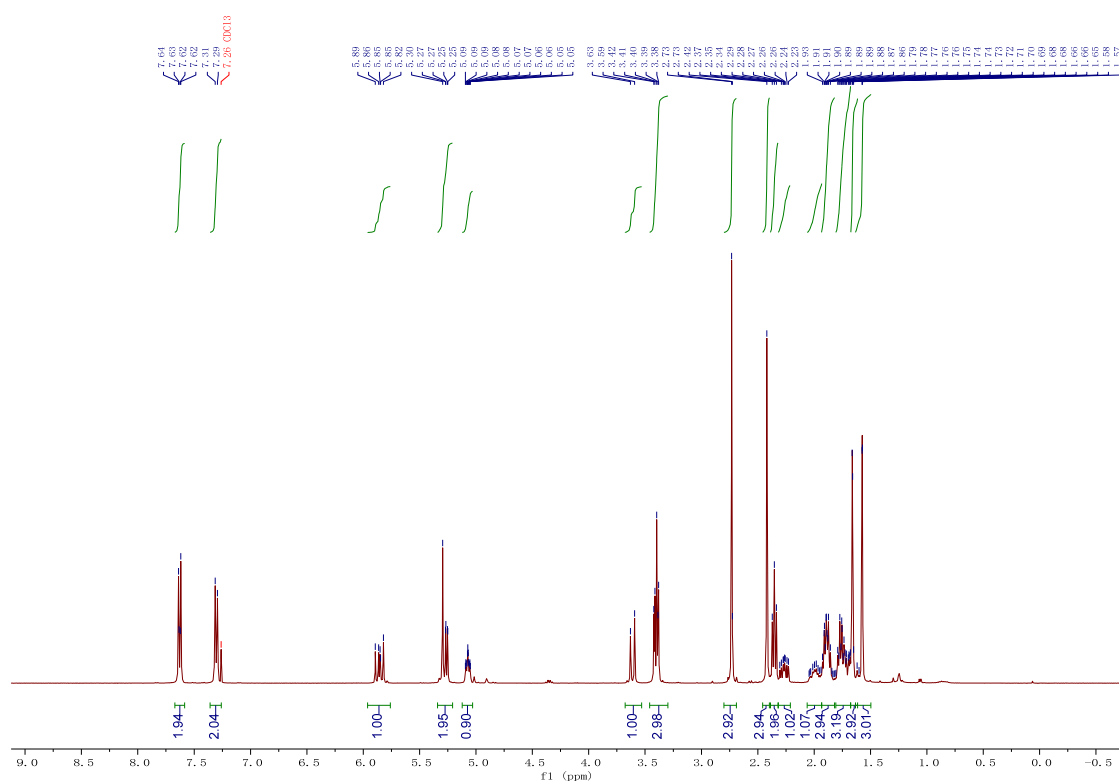

**<sup>13</sup>C NMR (101 MHz, CDCl<sub>3</sub>)**

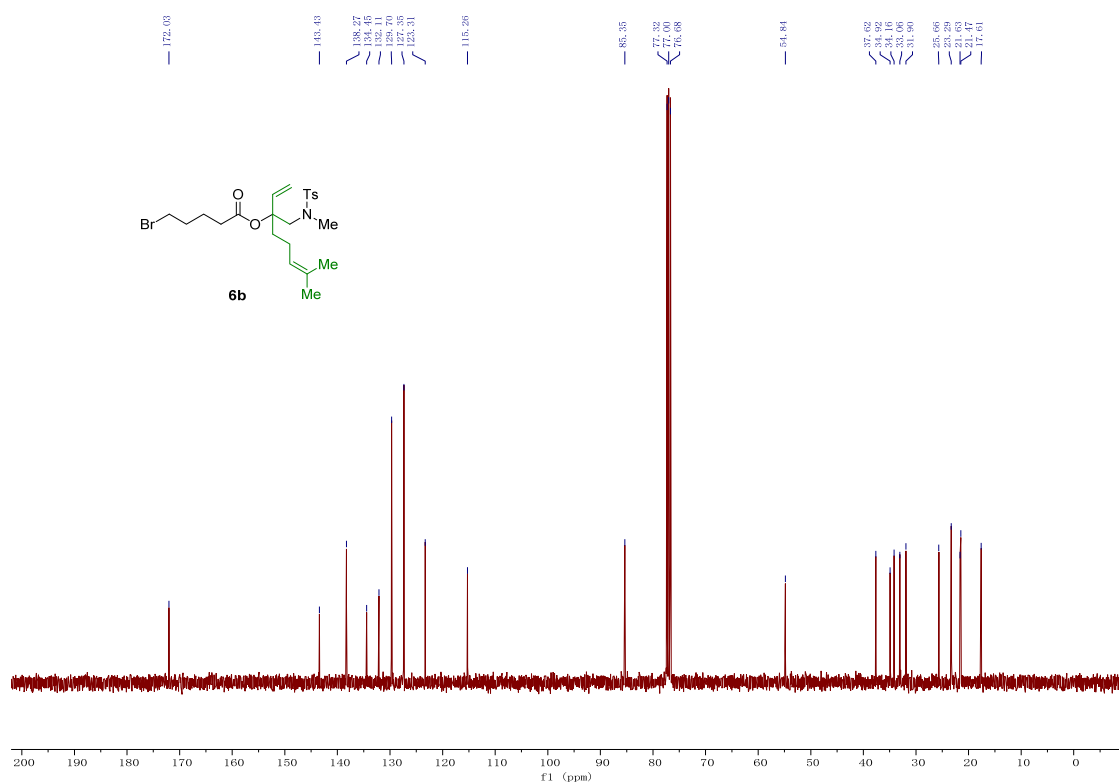

**6c**

CC(C)=C[C@H](OC(=O)CCc1ccc(Br)cc1)N(C)C(=O)c2ccc(C)cc2

<sup>1</sup>H NMR spectrum (CDCl<sub>3</sub>) of compound **6c**. The spectrum shows peaks in the aromatic region (7.0-7.7 ppm), a methine proton (5.0 ppm), a methoxy singlet (3.8 ppm), and aliphatic protons (2.3-2.7 ppm). Integration values are provided below the peaks.

| Chemical Shift (ppm)                                                                                                                                                                                                                                                                                                                                                                                                                                                                                                                                                                                                                                                                                                                                                                                                                                                                                                                                                                                                                                                                                                                                                                                                                                                                                                                                                                                                                                                                                                                                                                                                                                                                                                                                                                                                                                                                                                                                                                                                                                                                                                                                                                                                                                                                                                         | Integration                                    |
|------------------------------------------------------------------------------------------------------------------------------------------------------------------------------------------------------------------------------------------------------------------------------------------------------------------------------------------------------------------------------------------------------------------------------------------------------------------------------------------------------------------------------------------------------------------------------------------------------------------------------------------------------------------------------------------------------------------------------------------------------------------------------------------------------------------------------------------------------------------------------------------------------------------------------------------------------------------------------------------------------------------------------------------------------------------------------------------------------------------------------------------------------------------------------------------------------------------------------------------------------------------------------------------------------------------------------------------------------------------------------------------------------------------------------------------------------------------------------------------------------------------------------------------------------------------------------------------------------------------------------------------------------------------------------------------------------------------------------------------------------------------------------------------------------------------------------------------------------------------------------------------------------------------------------------------------------------------------------------------------------------------------------------------------------------------------------------------------------------------------------------------------------------------------------------------------------------------------------------------------------------------------------------------------------------------------------|------------------------------------------------|
| 7.65, 7.64, 7.63, 7.62, 7.59, 7.58, 7.57, 7.56, 7.55, 7.54, 7.53, 7.52, 7.51, 7.06, 7.05                                                                                                                                                                                                                                                                                                                                                                                                                                                                                                                                                                                                                                                                                                                                                                                                                                                                                                                                                                                                                                                                                                                                                                                                                                                                                                                                                                                                                                                                                                                                                                                                                                                                                                                                                                                                                                                                                                                                                                                                                                                                                                                                                                                                                                     | 2.08, 2.06, 2.05, 2.01                         |
| 5.05, 5.00                                                                                                                                                                                                                                                                                                                                                                                                                                                                                                                                                                                                                                                                                                                                                                                                                                                                                                                                                                                                                                                                                                                                                                                                                                                                                                                                                                                                                                                                                                                                                                                                                                                                                                                                                                                                                                                                                                                                                                                                                                                                                                                                                                                                                                                                                                                   | 1.00, 1.01                                     |
| 3.83, 3.80, 3.79, 3.69, 3.68, 3.67, 3.66, 3.65, 3.64, 3.63, 3.62, 3.61, 3.60, 3.59, 3.58, 3.57, 3.56, 3.55, 3.54, 3.53, 3.52, 3.51, 3.50, 3.49, 3.48, 3.47, 3.46, 3.45, 3.44, 3.43, 3.42, 3.41, 3.40, 3.39, 3.38, 3.37, 3.36, 3.35, 3.34, 3.33, 3.32, 3.31, 3.30, 3.29, 3.28, 3.27, 3.26, 3.25, 3.24, 3.23, 3.22, 3.21, 3.20, 3.19, 3.18, 3.17, 3.16, 3.15, 3.14, 3.13, 3.12, 3.11, 3.10, 3.09, 3.08, 3.07, 3.06, 3.05, 3.04, 3.03, 3.02, 3.01, 3.00, 2.99, 2.98, 2.97, 2.96, 2.95, 2.94, 2.93, 2.92, 2.91, 2.90, 2.89, 2.88, 2.87, 2.86, 2.85, 2.84, 2.83, 2.82, 2.81, 2.80, 2.79, 2.78, 2.77, 2.76, 2.75, 2.74, 2.73, 2.72, 2.71, 2.70, 2.69, 2.68, 2.67, 2.66, 2.65, 2.64, 2.63, 2.62, 2.61, 2.60, 2.59, 2.58, 2.57, 2.56, 2.55, 2.54, 2.53, 2.52, 2.51, 2.50, 2.49, 2.48, 2.47, 2.46, 2.45, 2.44, 2.43, 2.42, 2.41, 2.40, 2.39, 2.38, 2.37, 2.36, 2.35, 2.34, 2.33, 2.32, 2.31, 2.30, 2.29, 2.28, 2.27, 2.26, 2.25, 2.24, 2.23, 2.22, 2.21, 2.20, 2.19, 2.18, 2.17, 2.16, 2.15, 2.14, 2.13, 2.12, 2.11, 2.10, 2.09, 2.08, 2.07, 2.06, 2.05, 2.04, 2.03, 2.02, 2.01, 2.00, 1.99, 1.98, 1.97, 1.96, 1.95, 1.94, 1.93, 1.92, 1.91, 1.90, 1.89, 1.88, 1.87, 1.86, 1.85, 1.84, 1.83, 1.82, 1.81, 1.80, 1.79, 1.78, 1.77, 1.76, 1.75, 1.74, 1.73, 1.72, 1.71, 1.70, 1.69, 1.68, 1.67, 1.66, 1.65, 1.64, 1.63, 1.62, 1.61, 1.60, 1.59, 1.58, 1.57, 1.56, 1.55, 1.54, 1.53, 1.52, 1.51, 1.50, 1.49, 1.48, 1.47, 1.46, 1.45, 1.44, 1.43, 1.42, 1.41, 1.40, 1.39, 1.38, 1.37, 1.36, 1.35, 1.34, 1.33, 1.32, 1.31, 1.30, 1.29, 1.28, 1.27, 1.26, 1.25, 1.24, 1.23, 1.22, 1.21, 1.20, 1.19, 1.18, 1.17, 1.16, 1.15, 1.14, 1.13, 1.12, 1.11, 1.10, 1.09, 1.08, 1.07, 1.06, 1.05, 1.04, 1.03, 1.02, 1.01, 1.00, 0.99, 0.98, 0.97, 0.96, 0.95, 0.94, 0.93, 0.92, 0.91, 0.90, 0.89, 0.88, 0.87, 0.86, 0.85, 0.84, 0.83, 0.82, 0.81, 0.80, 0.79, 0.78, 0.77, 0.76, 0.75, 0.74, 0.73, 0.72, 0.71, 0.70, 0.69, 0.68, 0.67, 0.66, 0.65, 0.64, 0.63, 0.62, 0.61, 0.60, 0.59, 0.58, 0.57, 0.56, 0.55, 0.54, 0.53, 0.52, 0.51, 0.50, 0.49, 0.48, 0.47, 0.46, 0.45, 0.44, 0.43, 0.42, 0.41, 0.40, 0.39, 0.38, 0.37, 0.36, 0.35, 0.34, 0.33, 0.32, 0.31, 0.30, 0.29, 0.28, 0.27, 0.26, 0.25, 0.24, 0.23, 0.22, 0.21, 0.20, 0.19, 0.18, 0.17, 0.16, 0.15, 0.14, 0.13, 0.12, 0.11, 0.10, 0.09, 0.08, 0.07, 0.06, 0.05, 0.04, 0.03, 0.02, 0.01, 0.00 | 1.02, 1.02, 2.05, 3.06, 2.10, 3.10, 2.90, 3.05 |

**6c**

Chemical structure of **6c** is shown as an inset. The structure is a 4-bromophenyl group connected via a two-carbon chain to a carbonyl group, which is further connected to a chiral center. This chiral center is bonded to a methyl group, a vinyl group, a tosyl (Ts) group, and a dimethylamino (NMe<sub>2</sub>) group.

<sup>13</sup>C NMR spectrum (CDCl<sub>3</sub>) showing peaks at the following chemical shifts (ppm):

- 170.75
- 145.07
- 143.47
- 139.31
- 134.57
- 133.45
- 130.10
- 129.73
- 127.54
- 120.04
- 112.65
- 85.36
- 77.32 CDCl<sub>3</sub>
- 76.68 CDCl<sub>3</sub>
- 57.77
- 38.48
- 36.35
- 30.09
- 21.49
- 19.26

**<sup>1</sup>H NMR (400 MHz, CDCl<sub>3</sub>)**

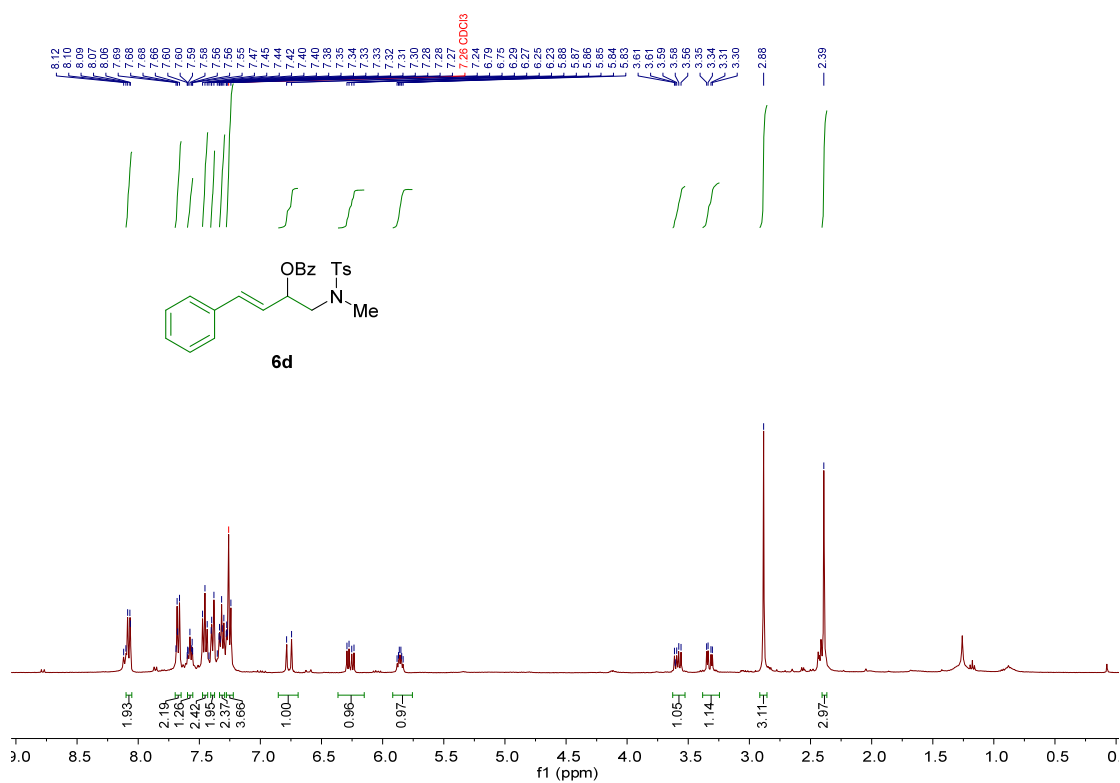

**<sup>13</sup>C NMR (101 MHz, CDCl<sub>3</sub>)**

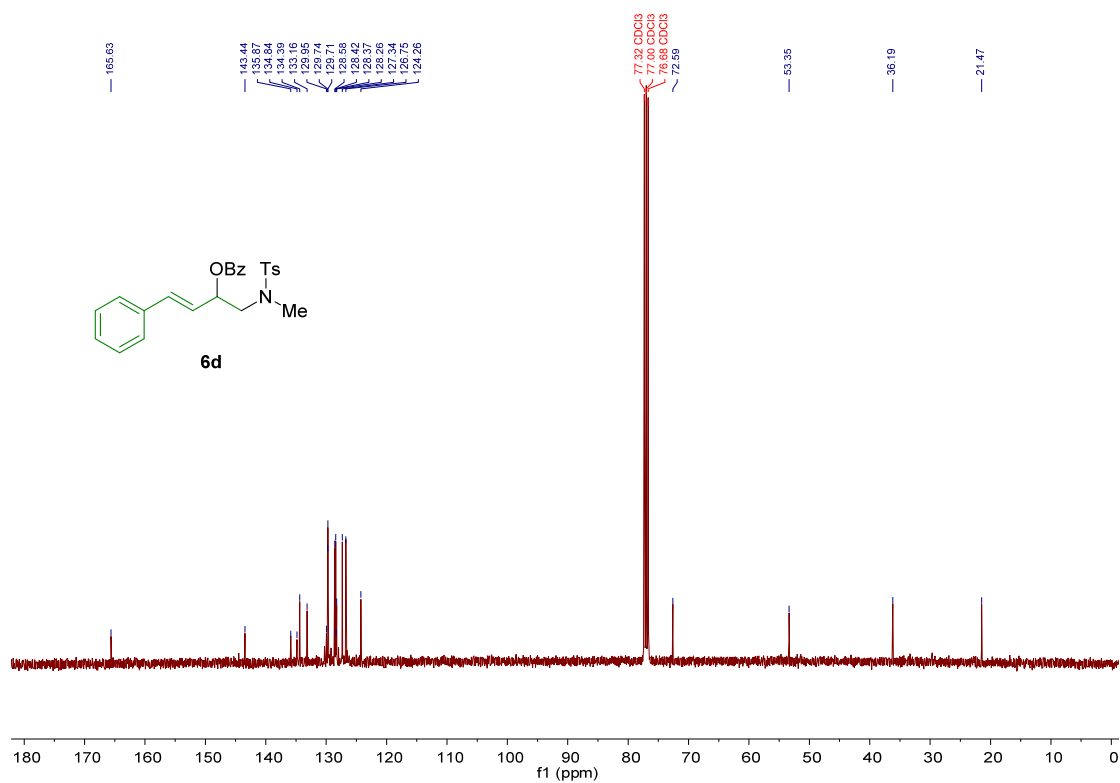

<sup>1</sup>H NMR (400 MHz, CDCl<sub>3</sub>)

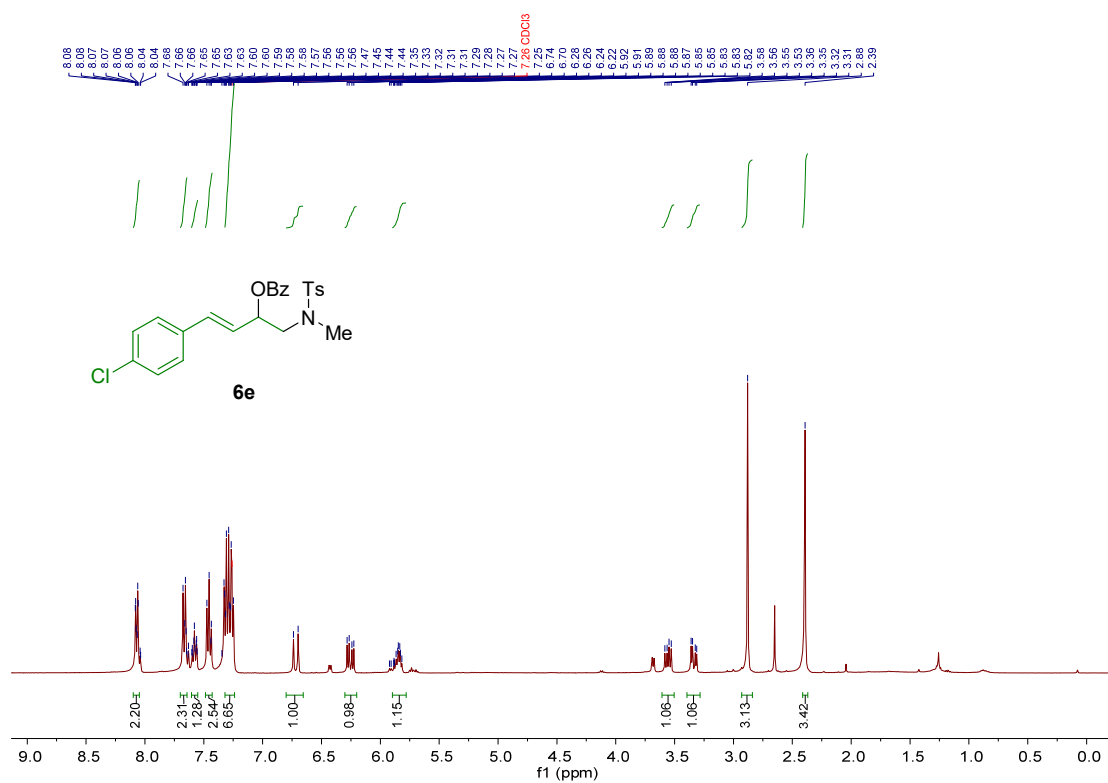

<sup>13</sup>C NMR (101 MHz, CDCl<sub>3</sub>)

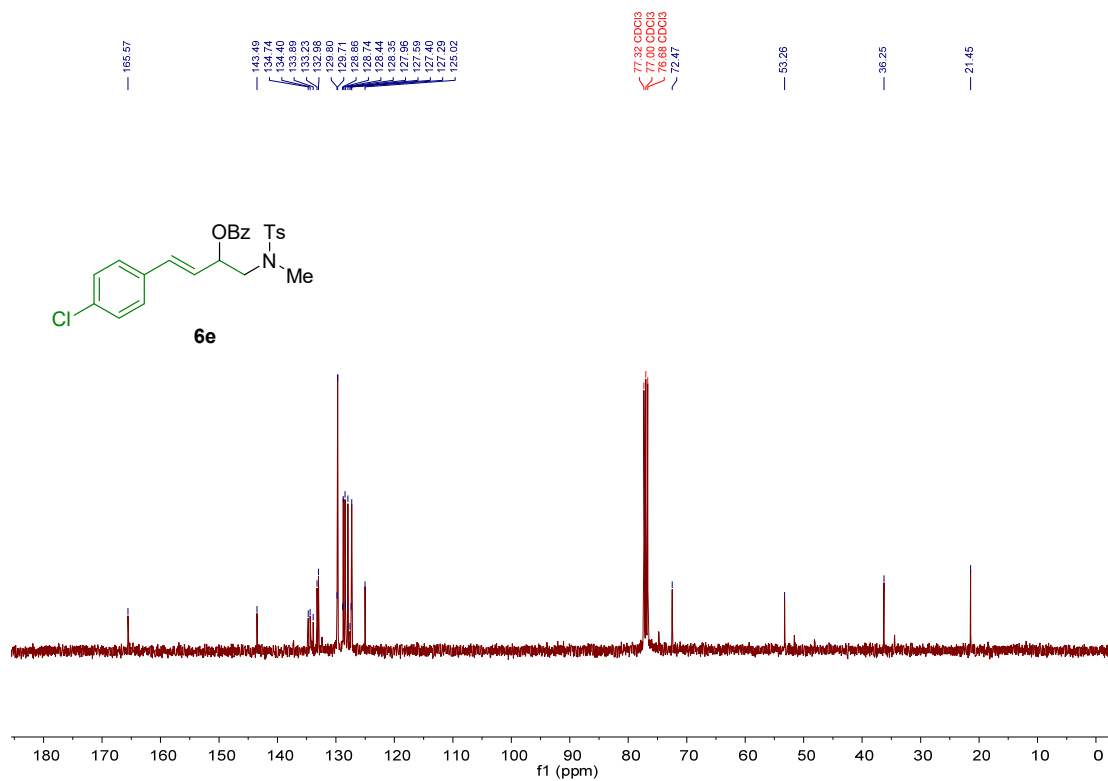

**<sup>1</sup>H NMR (400 MHz, CDCl<sub>3</sub>)**

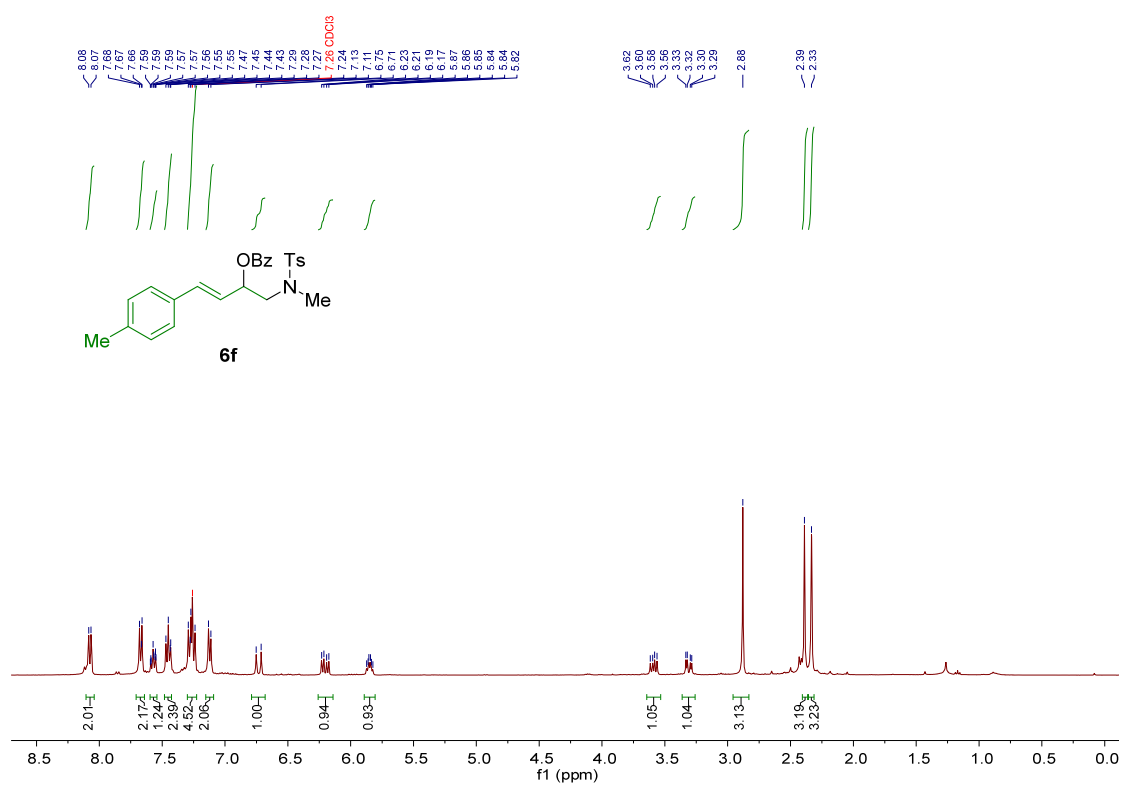

**<sup>13</sup>C NMR (101 MHz, CDCl<sub>3</sub>)**

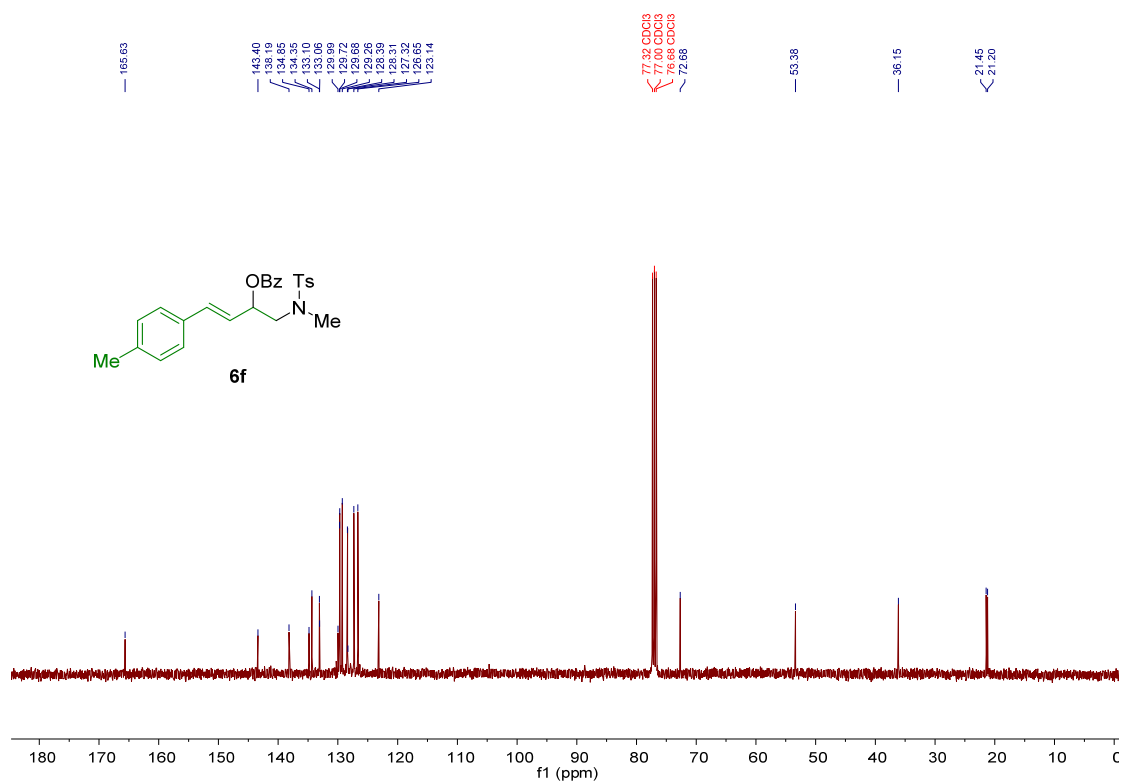

**<sup>1</sup>H NMR (400 MHz, CDCl<sub>3</sub>)**

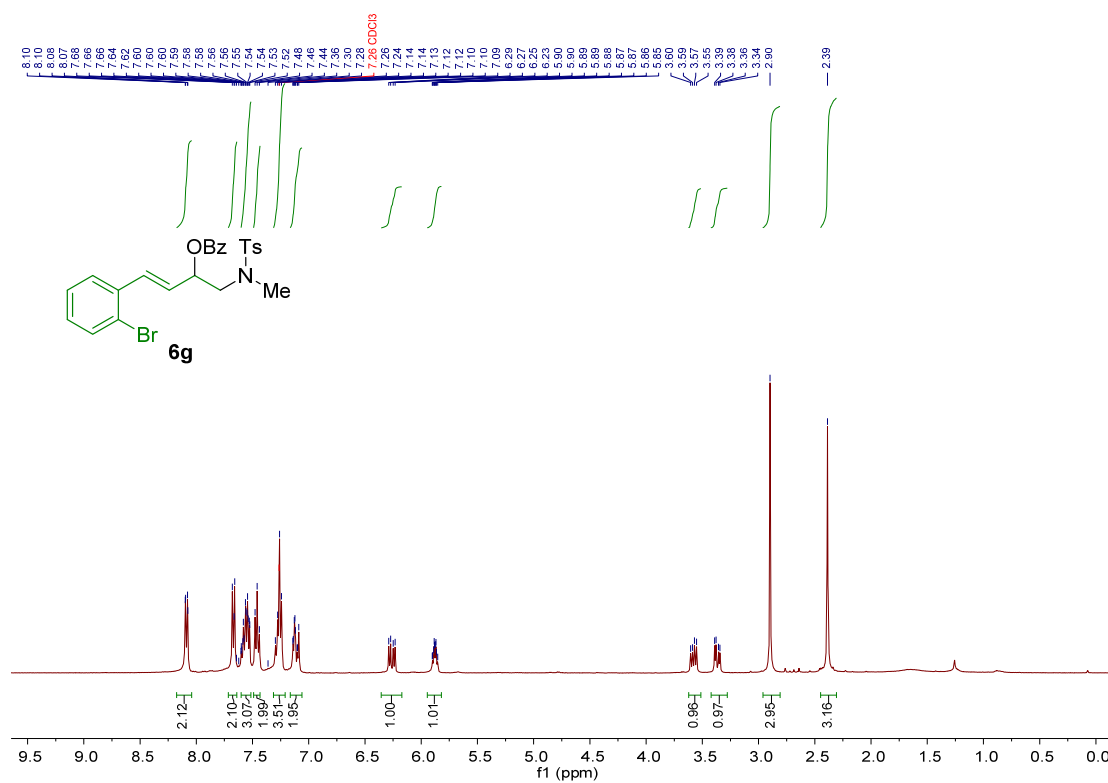

**<sup>13</sup>C NMR (101 MHz, CDCl<sub>3</sub>)**

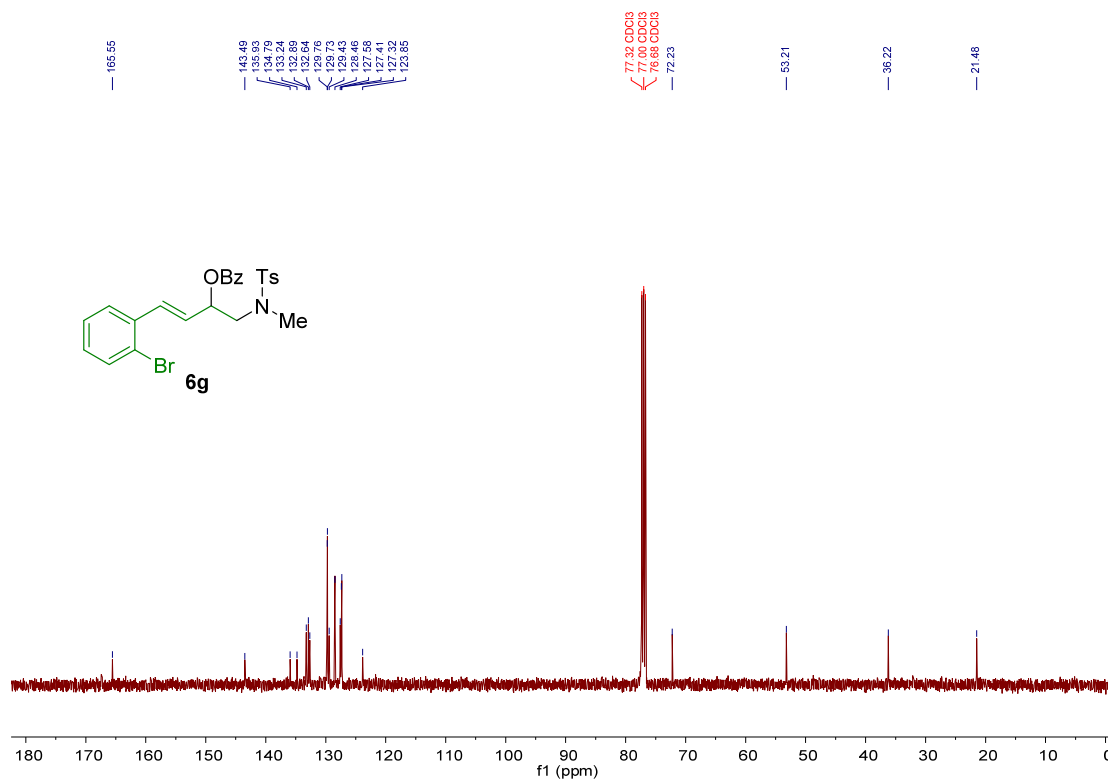

**<sup>1</sup>H NMR (400 MHz, CDCl<sub>3</sub>)**

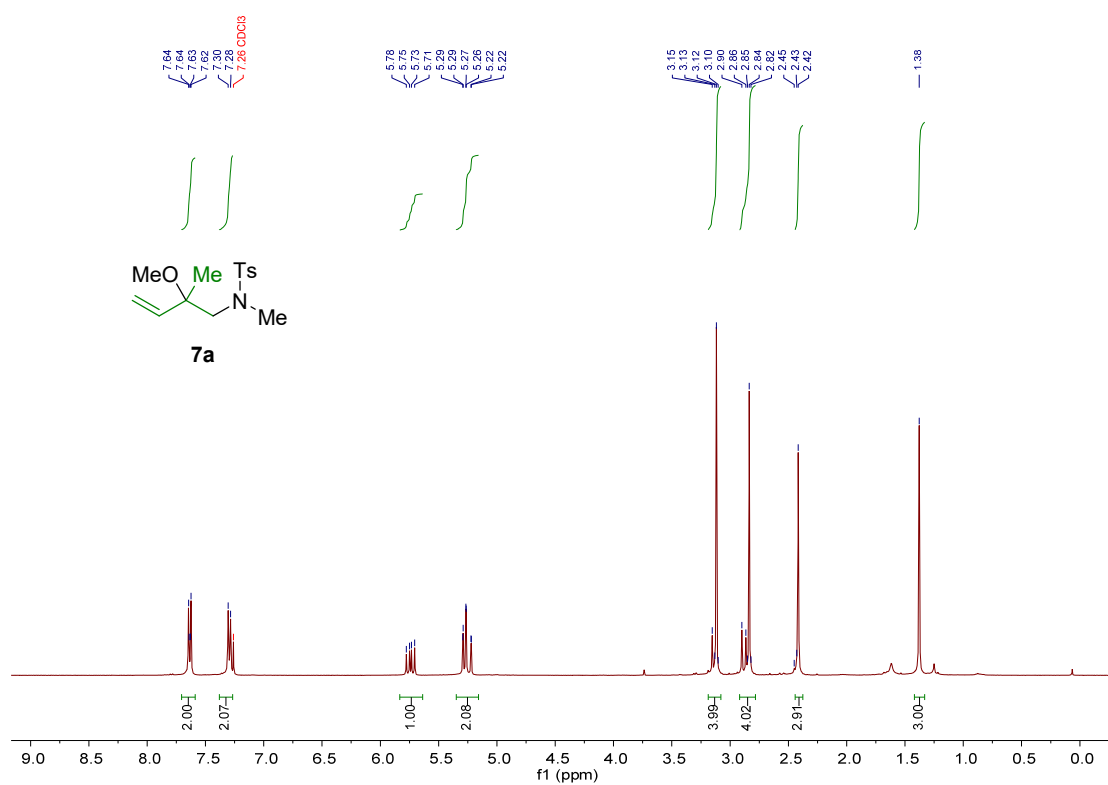

**<sup>13</sup>C NMR (101 MHz, CDCl<sub>3</sub>)**

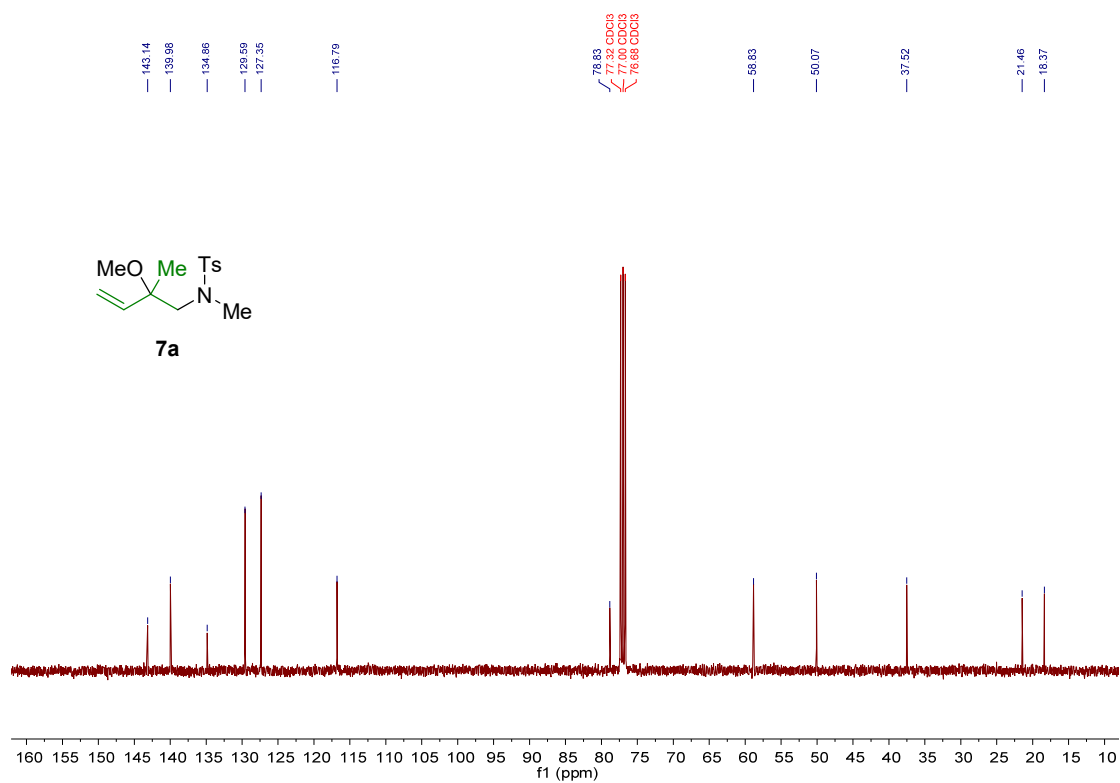

<sup>1</sup>H NMR (400 MHz, CDCl<sub>3</sub>)

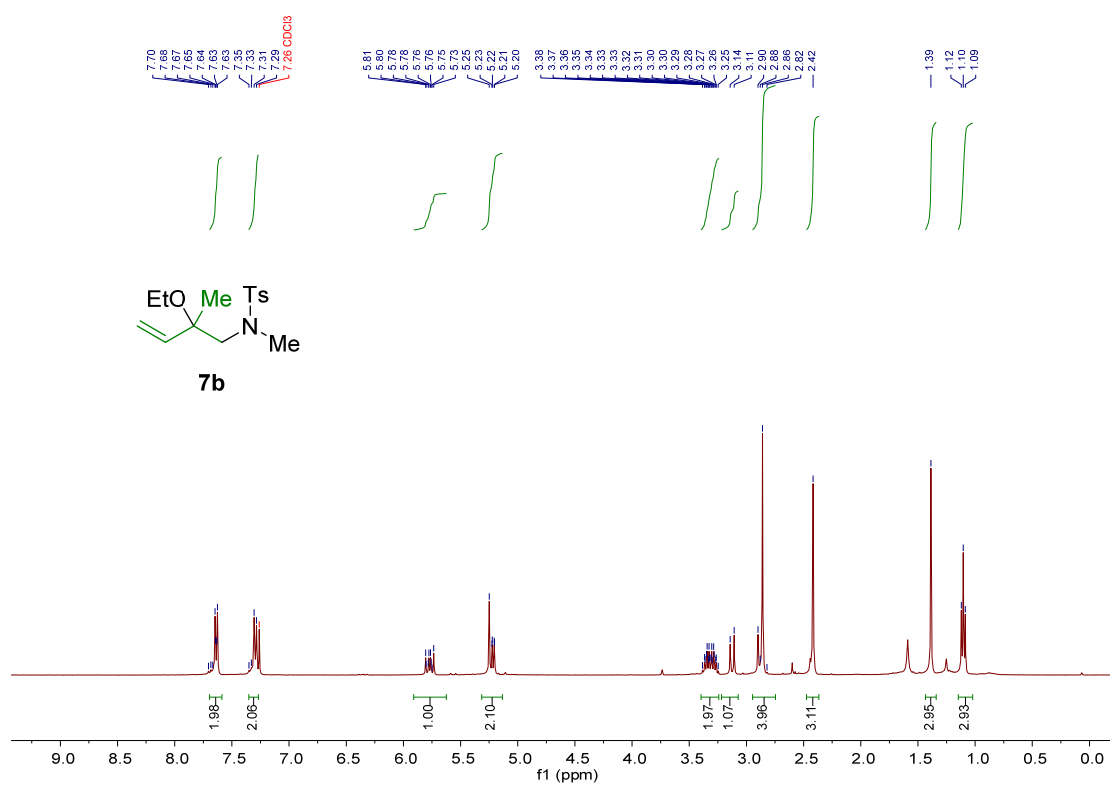

<sup>13</sup>C NMR (101 MHz, CDCl<sub>3</sub>)

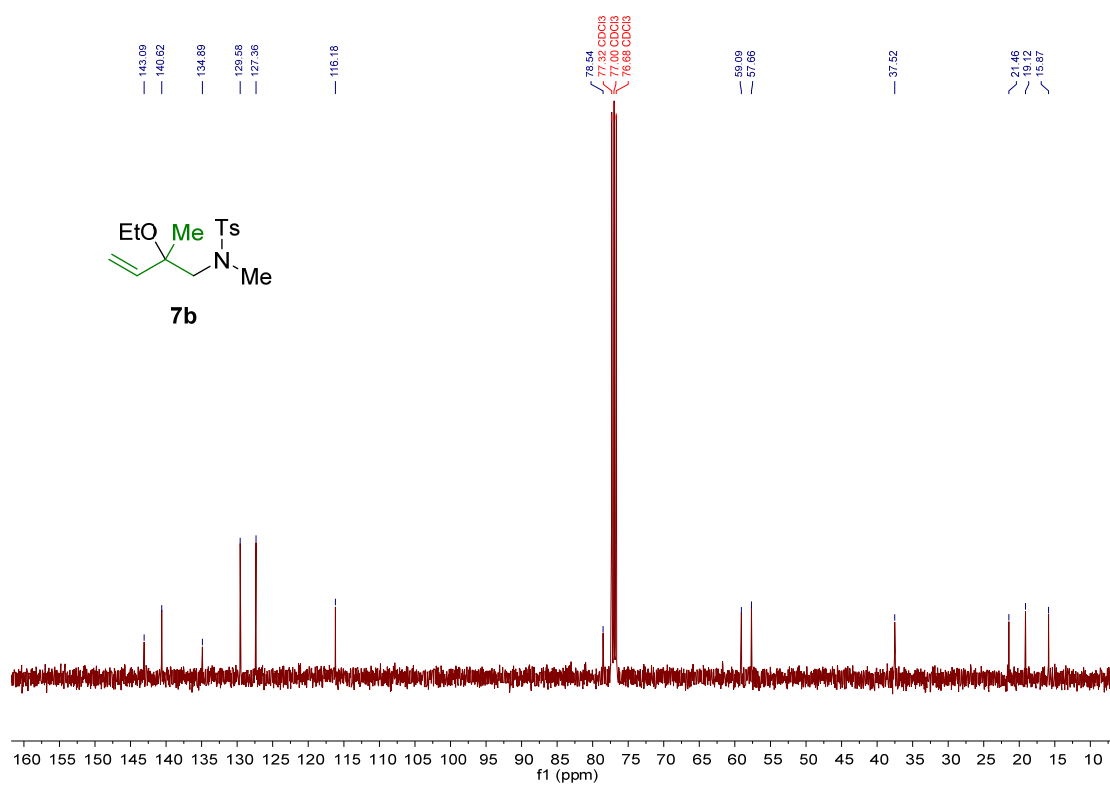

**$^1\text{H}$  NMR (400 MHz,  $\text{CDCl}_3$ )**

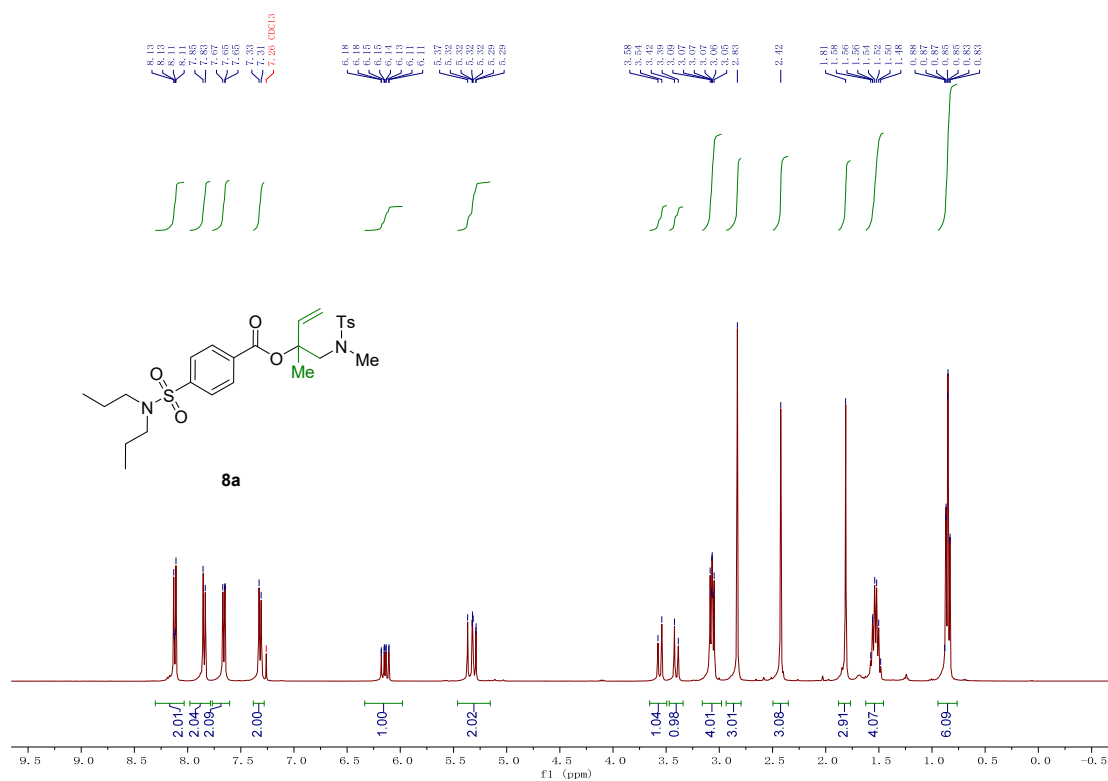

**$^{13}\text{C}$  NMR (101 MHz,  $\text{CDCl}_3$ )**

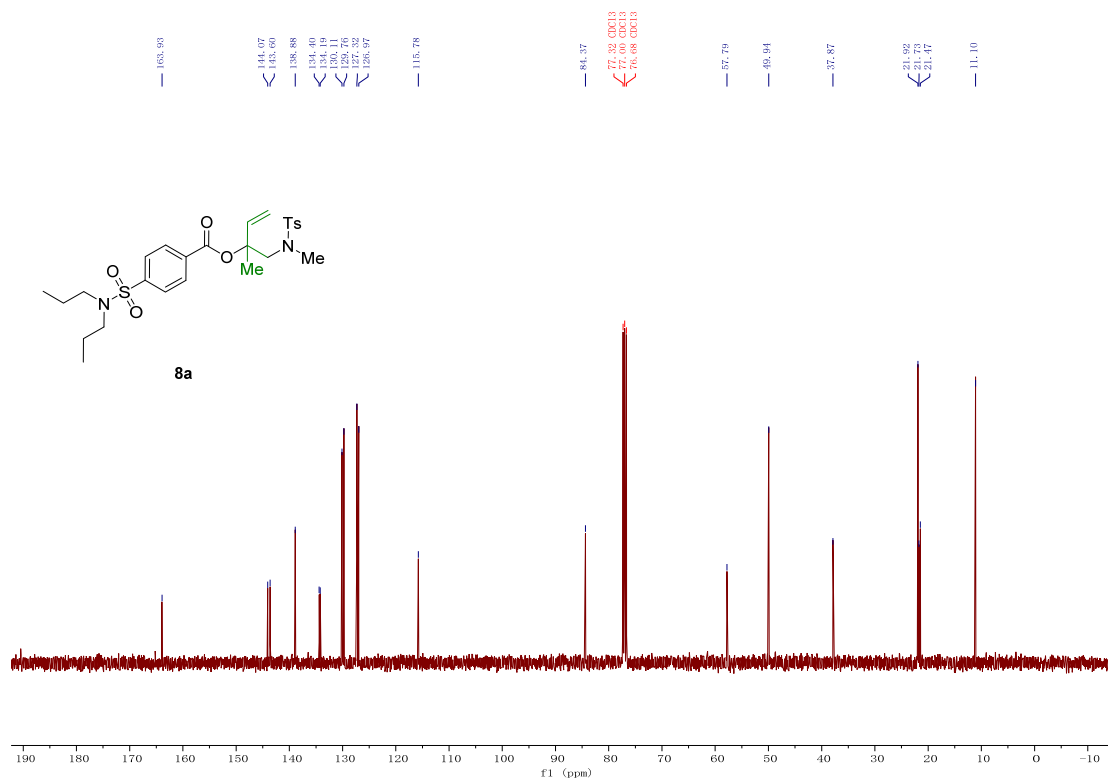

**<sup>1</sup>H NMR (400 MHz, CDCl<sub>3</sub>)**

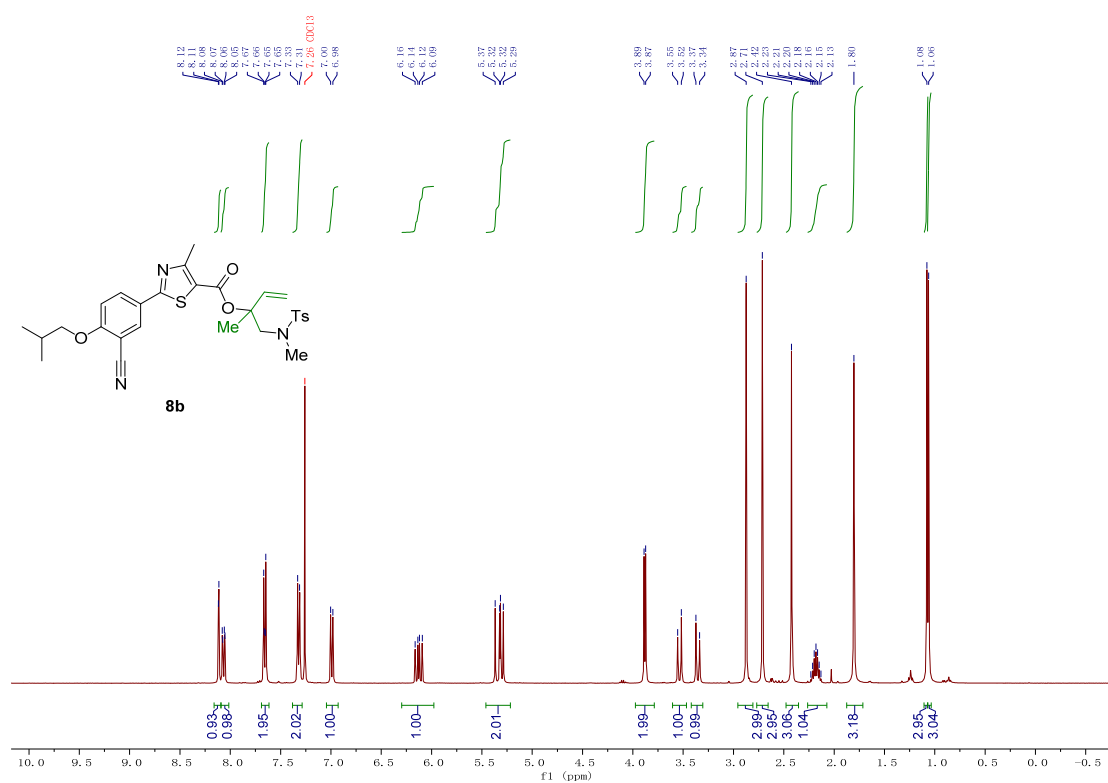

**<sup>13</sup>C NMR (101 MHz, CDCl<sub>3</sub>)**

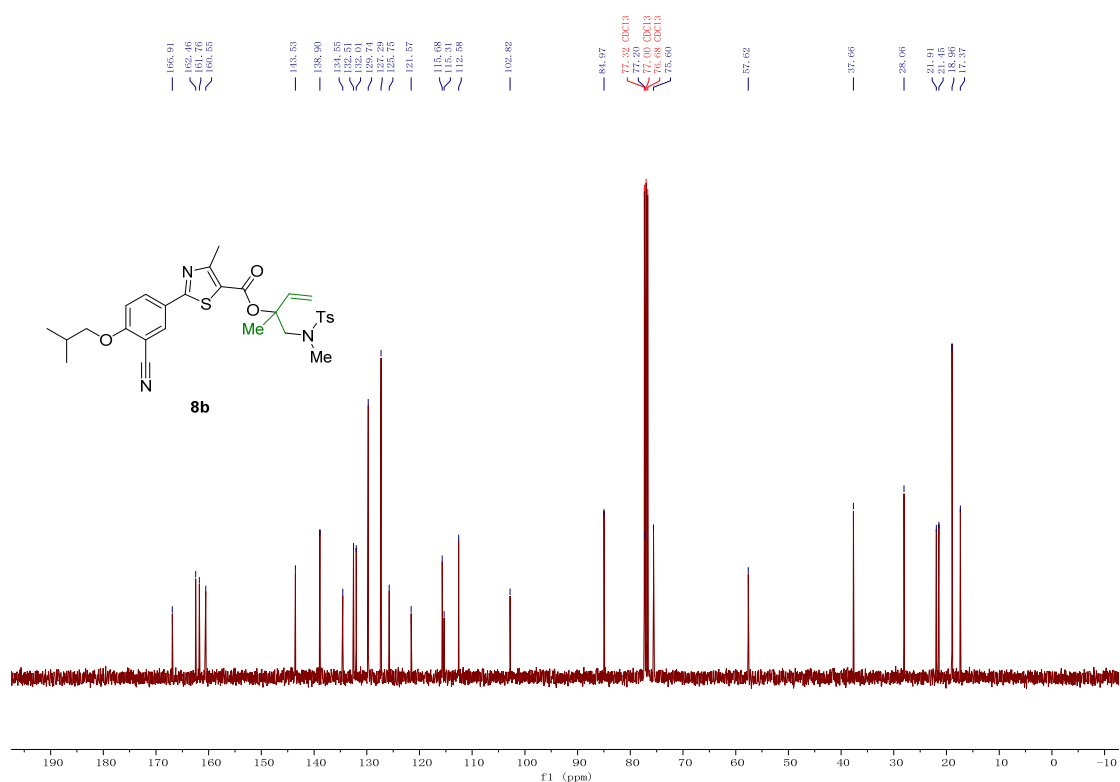

**<sup>1</sup>H NMR (400 MHz, CDCl<sub>3</sub>)**

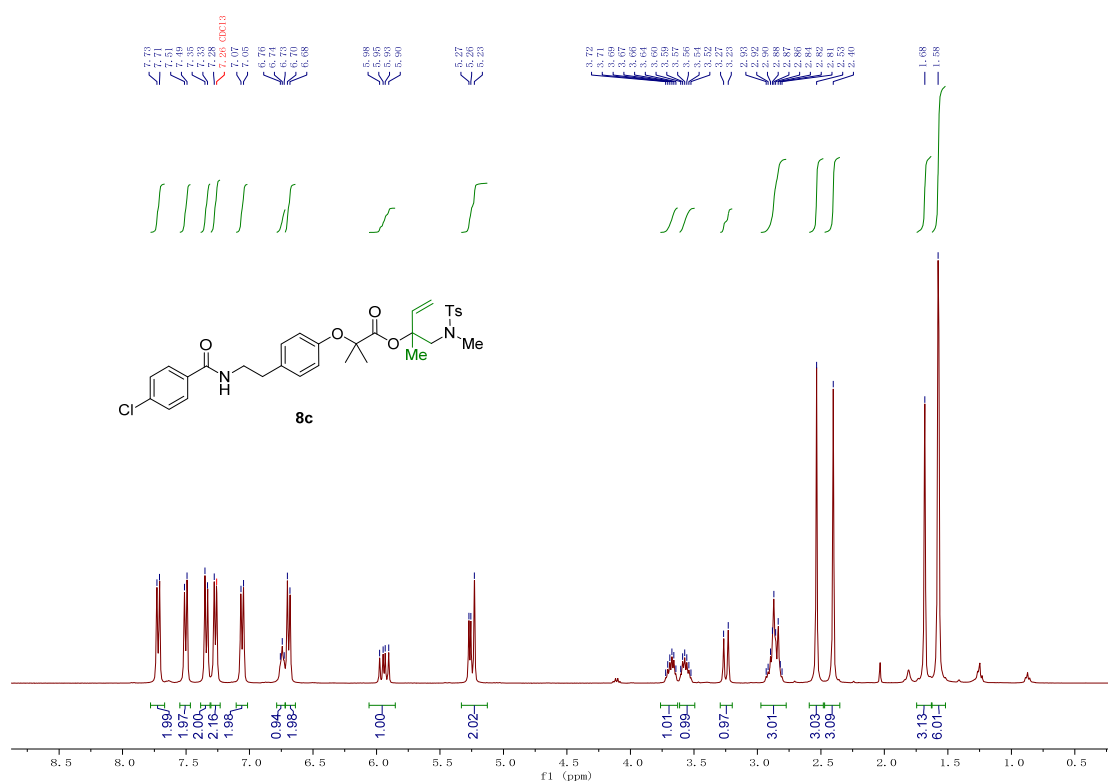

**<sup>13</sup>C NMR (101 MHz, CDCl<sub>3</sub>)**

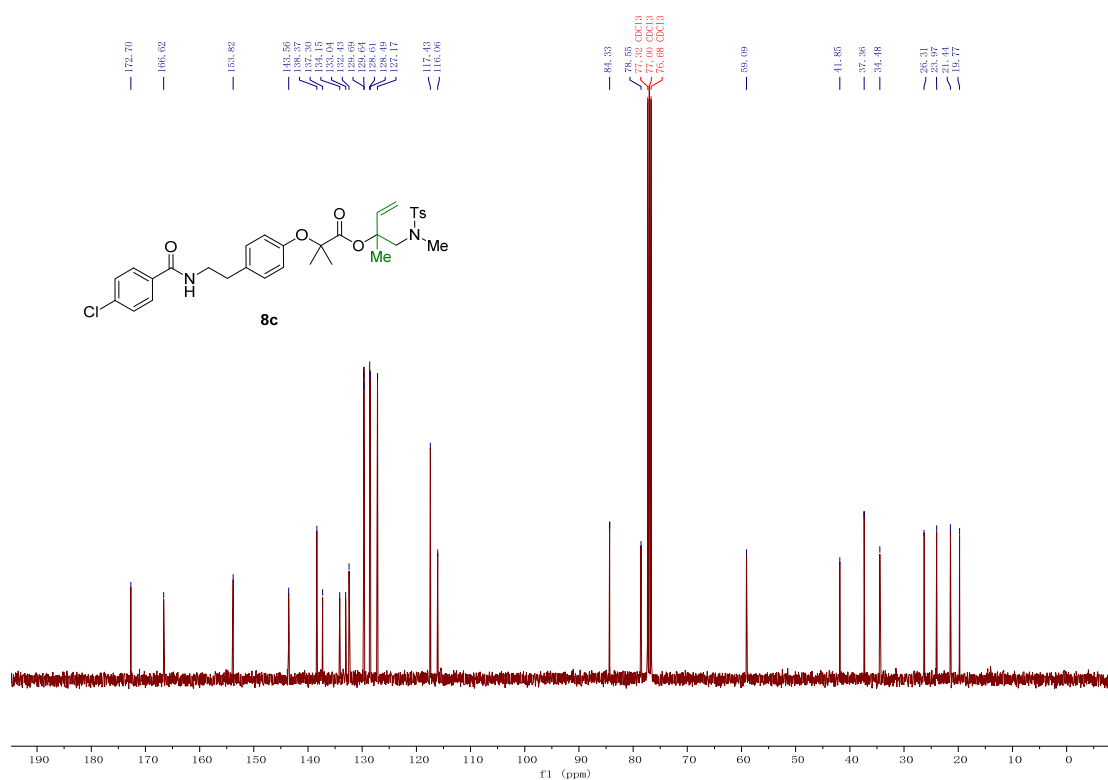

**8d**

Chemical structure of **8d** is shown above the spectrum.

<sup>1</sup>H NMR spectrum (CDCl<sub>3</sub>) of **8d** is shown below the structure. The x-axis represents the chemical shift in ppm (f1), ranging from 0.5 to 8.5. The spectrum displays several peaks, with integration values provided for each major signal.

Integration values (from left to right): 4.13, 1.98, 8.25, 1.00, 2.01, 1.00, 1.12, 2.00, 1.94, 3.17, 3.18, 2.91.

Chemical shifts (ppm) listed on the right side of the spectrum: 7.67, 7.65, 7.65, 7.64, 7.62, 7.62, 7.61, 7.61, 7.59, 7.59, 7.58, 7.58, 7.56, 7.55, 7.55, 7.54, 7.53, 7.53, 7.52, 7.52, 7.51, 7.50, 7.49, 7.49, 7.48, 7.48, 7.47, 7.47, 7.46, 7.46, 7.45, 7.45, 7.44, 7.44, 7.43, 7.43, 7.42, 7.42, 7.41, 7.41, 7.40, 7.39, 7.39, 7.38, 7.38, 7.37, 7.37, 7.36, 7.36, 7.35, 7.35, 7.34, 7.34, 7.33, 7.33, 7.32, 7.32, 7.31, 7.31, 7.30, 7.30, 7.29, 7.29, 7.28, 7.28, 7.27, 7.27, 7.26, 7.26, 7.25, 7.25, 7.24, 7.24, 7.23, 7.23, 7.22, 7.22, 7.21, 7.21, 7.20, 7.20, 7.19, 7.19, 7.18, 7.18, 7.17, 7.17, 7.16, 7.16, 7.15, 7.15, 7.14, 7.14, 7.13, 7.13, 7.12, 7.12, 7.11, 7.11, 7.10, 7.10, 7.09, 7.09, 7.08, 7.08, 7.07, 7.07, 7.06, 7.06, 7.05, 7.05, 7.04, 7.04, 7.03, 7.03, 7.02, 7.02, 7.01, 7.01, 7.00, 7.00, 6.99, 6.99, 6.98, 6.98, 6.97, 6.97, 6.96, 6.96, 6.95, 6.95, 6.94, 6.94, 6.93, 6.93, 6.92, 6.92, 6.91, 6.91, 6.90, 6.90, 6.89, 6.89, 6.88, 6.88, 6.87, 6.87, 6.86, 6.86, 6.85, 6.85, 6.84, 6.84, 6.83, 6.83, 6.82, 6.82, 6.81, 6.81, 6.80, 6.80, 6.79, 6.79, 6.78, 6.78, 6.77, 6.77, 6.76, 6.76, 6.75, 6.75, 6.74, 6.74, 6.73, 6.73, 6.72, 6.72, 6.71, 6.71, 6.70, 6.70, 6.69, 6.69, 6.68, 6.68, 6.67, 6.67, 6.66, 6.66, 6.65, 6.65, 6.64, 6.64, 6.63, 6.63, 6.62, 6.62, 6.61, 6.61, 6.60, 6.60, 6.59, 6.59, 6.58, 6.58, 6.57, 6.57, 6.56, 6.56, 6.55, 6.55, 6.54, 6.54, 6.53, 6.53, 6.52, 6.52, 6.51, 6.51, 6.50, 6.50, 6.49, 6.49, 6.48, 6.48, 6.47, 6.47, 6.46, 6.46, 6.45, 6.45, 6.44, 6.44, 6.43, 6.43, 6.42, 6.42, 6.41, 6.41, 6.40, 6.40, 6.39, 6.39, 6.38, 6.38, 6.37, 6.37, 6.36, 6.36, 6.35, 6.35, 6.34, 6.34, 6.33, 6.33, 6.32, 6.32, 6.31, 6.31, 6.30, 6.30, 6.29, 6.29, 6.28, 6.28, 6.27, 6.27, 6.26, 6.26, 6.25, 6.25, 6.24, 6.24, 6.23, 6.23, 6.22, 6.22, 6.21, 6.21, 6.20, 6.20, 6.19, 6.19, 6.18, 6.18, 6.17, 6.17, 6.16, 6.16, 6.15, 6.15, 6.14, 6.14, 6.13, 6.13, 6.12, 6.12, 6.11, 6.11, 6.10, 6.10, 6.09, 6.09, 6.08, 6.08, 6.07, 6.07, 6.06, 6.06, 6.05, 6.05, 6.04, 6.04, 6.03, 6.03, 6.02, 6.02, 6.01, 6.01, 6.00, 6.00, 5.99, 5.99, 5.98, 5.98, 5.97, 5.97, 5.96, 5.96, 5.95, 5.95, 5.94, 5.94, 5.93, 5.93, 5.92, 5.92, 5.91, 5.91, 5.90, 5.90, 5.89, 5.89, 5.88, 5.88, 5.87, 5.87, 5.86, 5.86, 5.85, 5.85, 5.84, 5.84, 5.83, 5.83, 5.82, 5.82, 5.81, 5.81, 5.80, 5.80, 5.79, 5.79, 5.78, 5.78, 5.77, 5.77, 5.76, 5.76, 5.75, 5.75, 5.74, 5.74, 5.73, 5.73, 5.72, 5.72, 5.71, 5.71, 5.70, 5.70, 5.69, 5.69, 5.68, 5.68, 5.67, 5.67, 5.66, 5.66, 5.65, 5.65, 5.64, 5.64, 5.63, 5.63, 5.62, 5.62, 5.61, 5.61, 5.60, 5.60, 5.59, 5.59, 5.58, 5.58, 5.57, 5.57, 5.56, 5.56, 5.55, 5.55, 5.54, 5.54, 5.53, 5.53, 5.52, 5.52, 5.51, 5.51, 5.50, 5.50, 5.49, 5.49, 5.48, 5.48, 5.47, 5.47, 5.46, 5.46, 5.45, 5.45, 5.44, 5.44, 5.43, 5.43, 5.42, 5.42, 5.41, 5.41, 5.40, 5.40, 5.39, 5.39, 5.38, 5.38, 5.37, 5.37, 5.36, 5.36, 5.35, 5.35, 5.34, 5.34, 5.33, 5.33, 5.32, 5.32, 5.31, 5.31, 5.30, 5.30, 5.29, 5.29, 5.28, 5.28, 5.27, 5.27, 5.26, 5.26, 5.25, 5.25, 5.24, 5.24, 5.23, 5.23, 5.22, 5.22, 5.21, 5.21, 5.20, 5.20, 5.19, 5.19, 5.18, 5.18, 5.17, 5.17, 5.16, 5.16, 5.15, 5.15, 5.14, 5.14, 5.13, 5.13, 5.12, 5.12, 5.11, 5.11, 5.10, 5.10, 5.09, 5.09, 5.08, 5.08, 5.07, 5.07, 5.06, 5.06, 5.05, 5.05, 5.04, 5.04, 5.03, 5.03, 5.02, 5.02, 5.01, 5.01, 5.00, 5.00, 4.99, 4.99, 4.98, 4.98, 4.97, 4.97, 4.96, 4.96, 4.95, 4.95, 4.94, 4.94, 4.93, 4.93, 4.92, 4.92, 4.91, 4.91, 4.90, 4.90, 4.89, 4.89, 4.88, 4.88, 4.87, 4.87, 4.86, 4.86, 4.85, 4.85, 4.84, 4.84, 4.83, 4.83, 4.82, 4.82, 4.81, 4.81, 4.80, 4.80, 4.79, 4.79, 4.78, 4.78, 4.77, 4.77, 4.76, 4.76, 4.75, 4.75, 4.74, 4.74, 4.73, 4.73, 4.72, 4.72, 4.71, 4.71, 4.70, 4.70, 4.69, 4.69, 4.68, 4.68, 4.67, 4.67, 4.66, 4.66, 4.65, 4.65, 4.64, 4.64, 4.63, 4.63, 4.62, 4.62, 4.61, 4.61, 4.60, 4.60, 4.59, 4.59, 4.58, 4.58, 4.57, 4.57, 4.56, 4.56, 4.55, 4.55, 4.54, 4.54, 4.53, 4.53, 4.52, 4.52, 4.51, 4.51, 4.50, 4.50, 4.49, 4.49, 4.48, 4.48, 4.47, 4.47, 4.46, 4.46,

**8d**

<sup>13</sup>C NMR spectrum (CDCl<sub>3</sub>) of compound **8d**. The spectrum shows peaks corresponding to the chemical structure, with the following chemical shifts (ppm) labeled: 170.56, 161.65, 143.96, 143.37, 139.04, 134.54, 134.54, 132.28, 129.66, 129.66, 128.56, 128.47, 127.99, 127.70, 126.40, 115.35, 83.69, 77.32 (CDCl<sub>3</sub>), 77.00 (CDCl<sub>3</sub>), 76.68 (CDCl<sub>3</sub>), 57.52, 37.61, 31.87, 23.27, 23.12, 22.91, 22.40.

**<sup>1</sup>H NMR (400 MHz, CDCl<sub>3</sub>)**

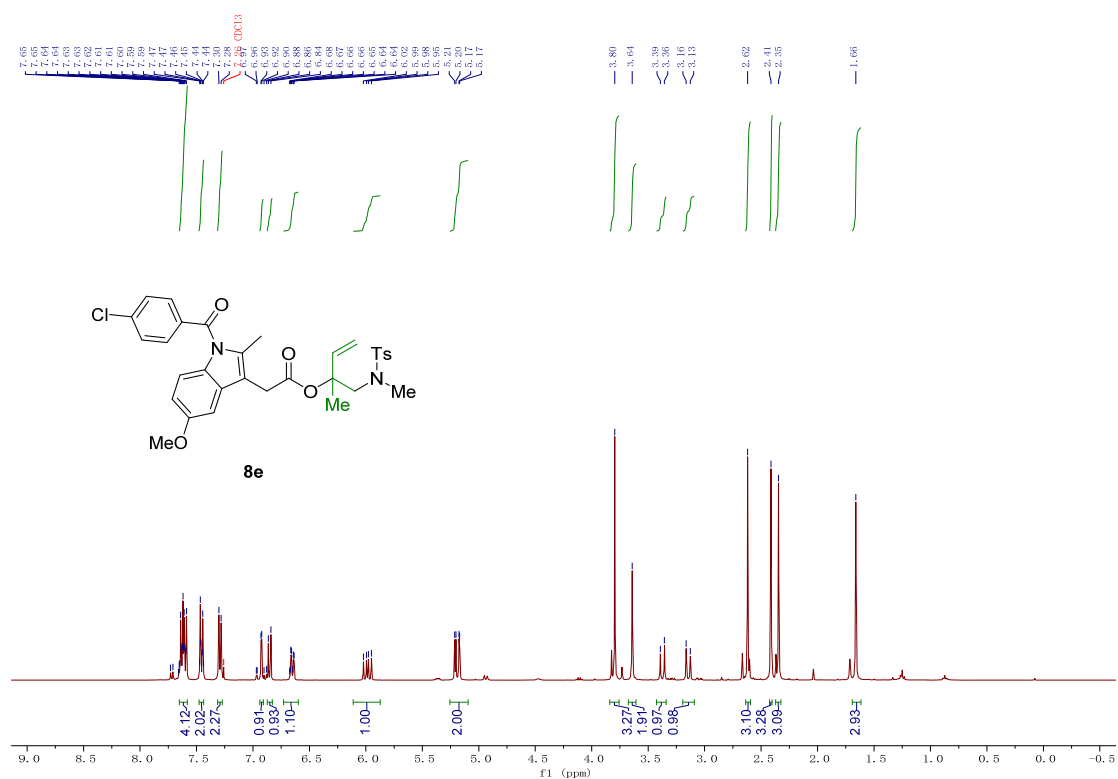

**<sup>13</sup>C NMR (101 MHz, CDCl<sub>3</sub>)**

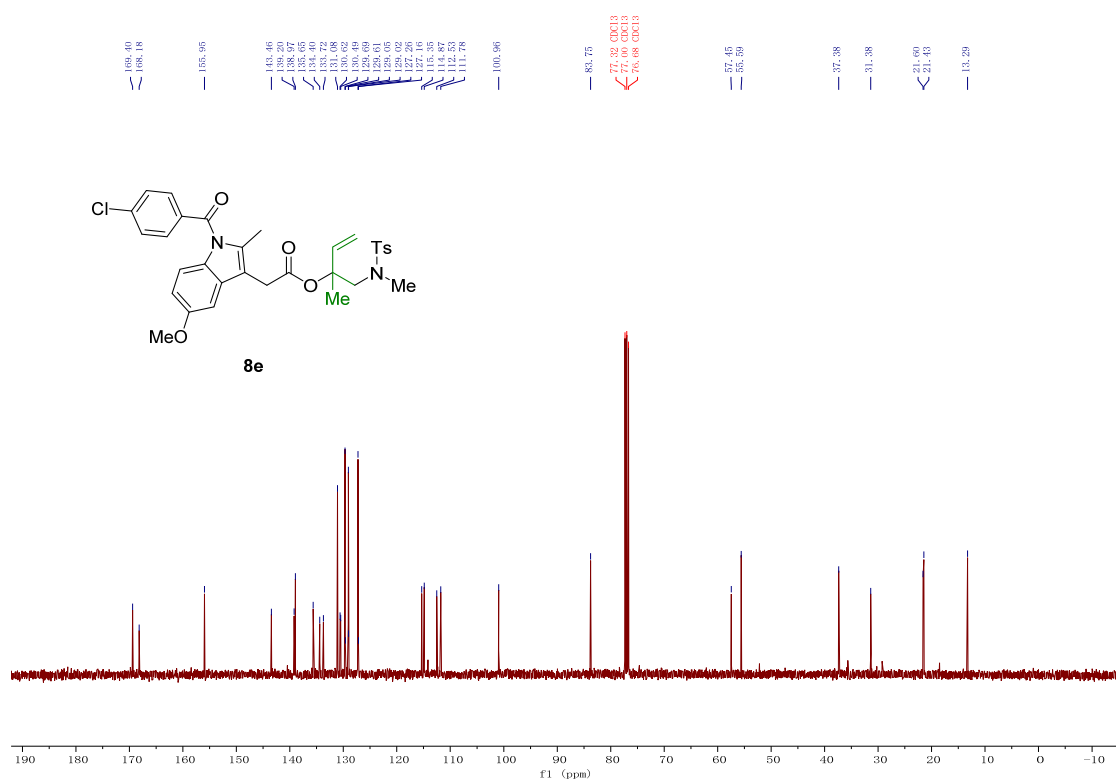

**<sup>1</sup>H NMR (400 MHz, CDCl<sub>3</sub>)**

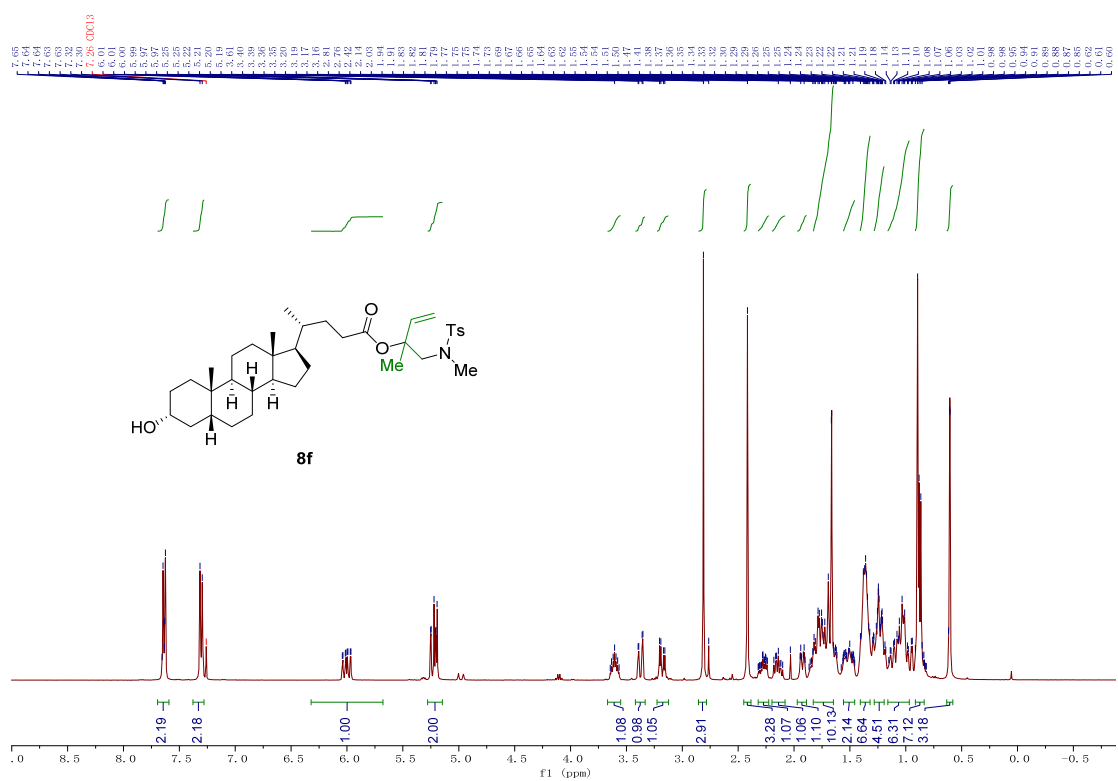

**<sup>13</sup>C NMR (101 MHz, CDCl<sub>3</sub>)**

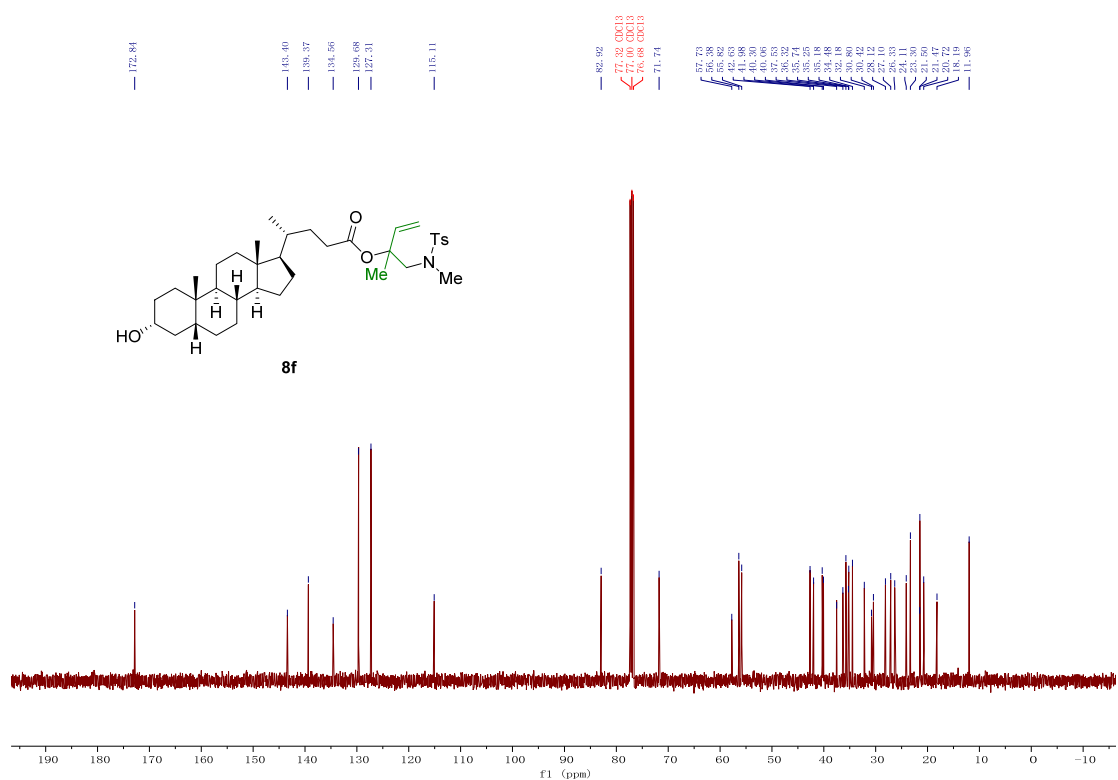

**<sup>1</sup>H NMR (400 MHz, CDCl<sub>3</sub>)**

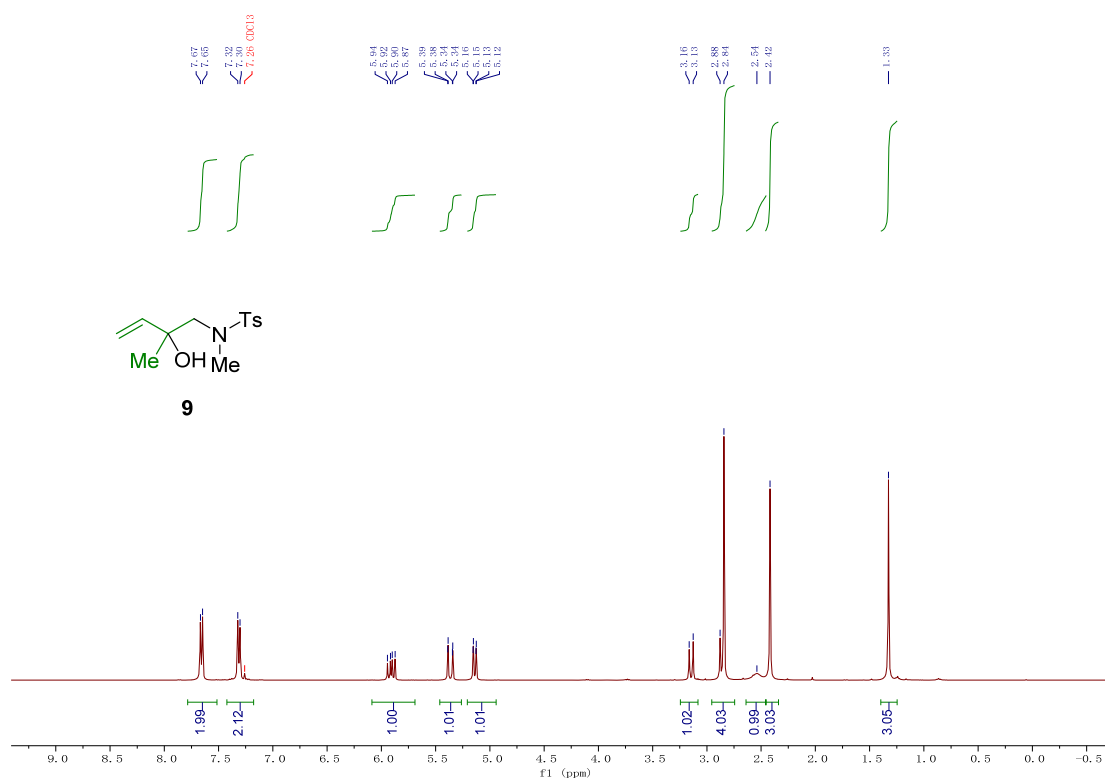

**<sup>13</sup>C NMR (101 MHz, CDCl<sub>3</sub>)**

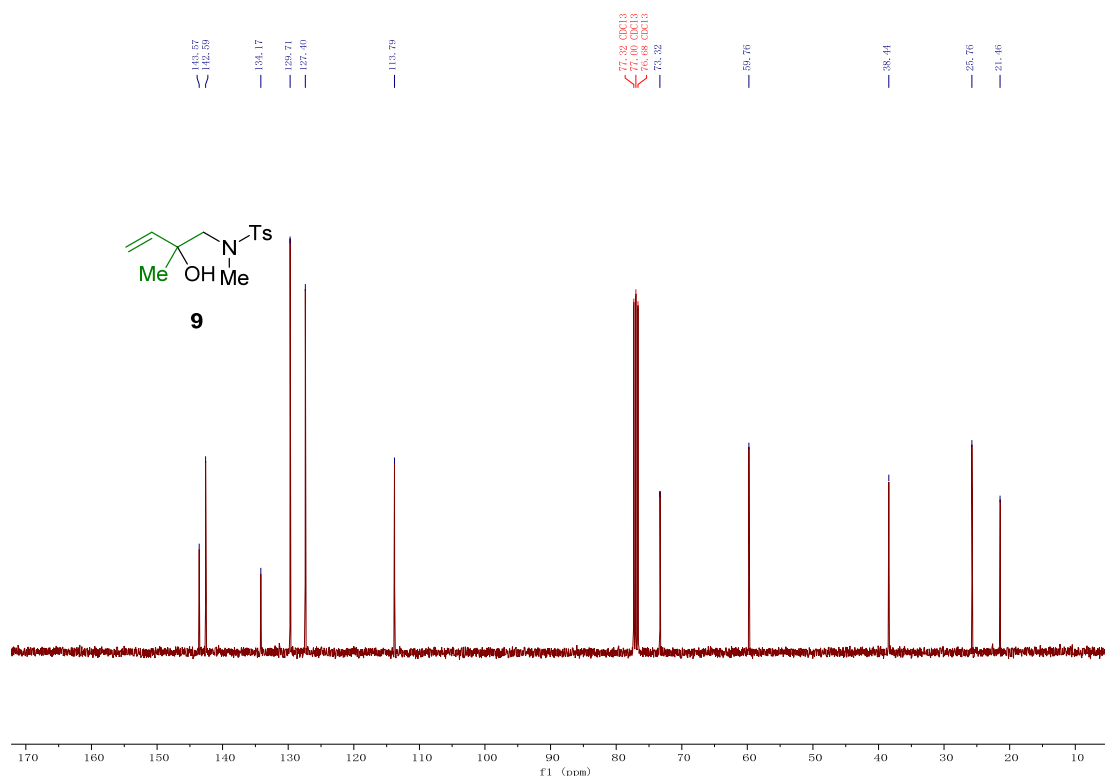

**10**

C[C@H](O)[C@@H]1CO1CN(C)C2=CC=CC=C2

Chemical structure of compound 10: (S)-1-(2-methyl-2-(tosylamino)ethoxy)propan-2-ol. The structure shows a central carbon atom bonded to a methyl group (Me), a hydroxyl group (OH), and a 2-methyl-2-(tosylamino)ethoxy group. The tosyl group (Ts) is represented as a benzene ring attached to a sulfonyl group (SO<sub>2</sub>).

<sup>1</sup>H NMR spectrum (CDCl<sub>3</sub>) of compound 10. The spectrum shows peaks in the aromatic region (7.2-7.8 ppm), a multiplet for the methine proton (3.2-3.4 ppm), a multiplet for the methoxy protons (2.3-2.7 ppm), and a singlet for the methyl protons (1.2 ppm). Integration values are provided for each peak.

| Chemical Shift (ppm) | Integration |
|----------------------|-------------|
| 7.75                 | 1.98        |
| 7.65                 | 2.00        |
| 3.35                 | 1.07        |
| 3.25                 | 3.21        |
| 3.15                 | 1.07        |
| 2.65                 | 2.93        |
| 2.55                 | 1.02        |
| 1.25                 | 2.99        |

Chemical structure of **10**: (S)-2-methyl-2-(tosyloxymethyl)oxirane.

<sup>1</sup>H NMR (CDCl<sub>3</sub>) peaks (ppm): 7.75, 7.70, 7.68, 7.66 (aromatic), 4.46, 4.3, 4.2, 4.1 (CH<sub>2</sub>), 3.8, 3.7, 3.6 (CH), 2.4, 2.3, 2.2 (Me), 2.1, 2.0 (Me).

<sup>13</sup>C NMR (CDCl<sub>3</sub>) peaks (ppm): 145.55, 143.52, 134.28, 134.12, 129.71, 127.42, 127.25 (aromatic), 77.55, 77.00, 76.68, 76.13 (CDCl<sub>3</sub>), 70.78, 70.14 (CH<sub>2</sub>), 58.68, 58.5, 58.15, 56.07 (CH), 44.46, 43.14, 38.28, 37.91 (Me), 24.22, 23.91, 23.14 (Me).
